# Supplementary material for: Highly atom-economical, catalyst-free, and solvent-free phosphorylation of chalcogenides
Source: Royal Society of Chemistry journal article supplement (doi:10.1039/c9ob01921a), 2019-01-01
Supplement: c9ob01921a1.pdf [file c9ob01921a1.pdf]

## **Highly Atom-Economic, Catalyst-free, and Solvent-free Phosphorylation of Chalcogenides**

Rakhee Choudhary†, Pratibha Singh†, Rekha Bai† Mahesh C. Sharma and Satpal Singh Badsara\*

*MFOS Laboratory, Department of Chemistry (Centre of Advanced Study), University of Rajasthan, JLN Marg, Jaipur, Rajasthan, India-302004*

**$^1\text{H}$ ,  $^{13}\text{C}$ ,  $^{31}\text{P}$  NMR spectra and mass spectra of products 3, 5, 7 & 8**

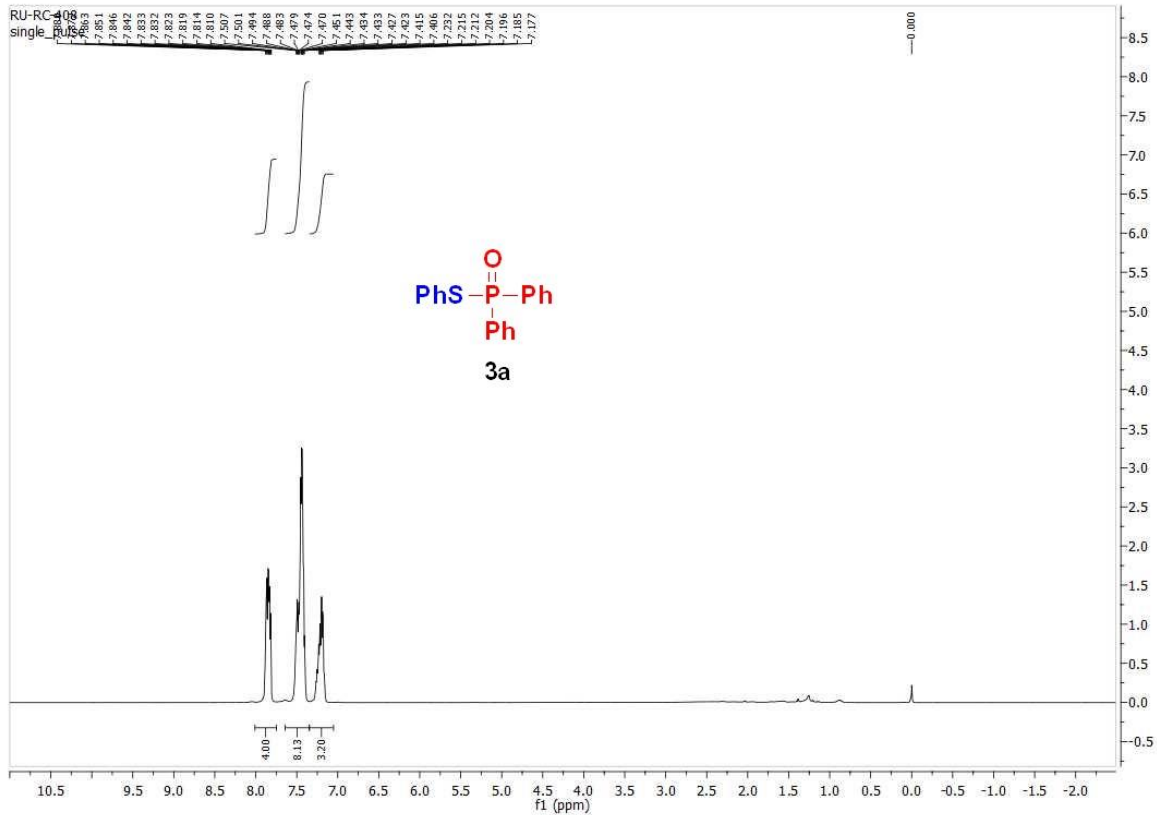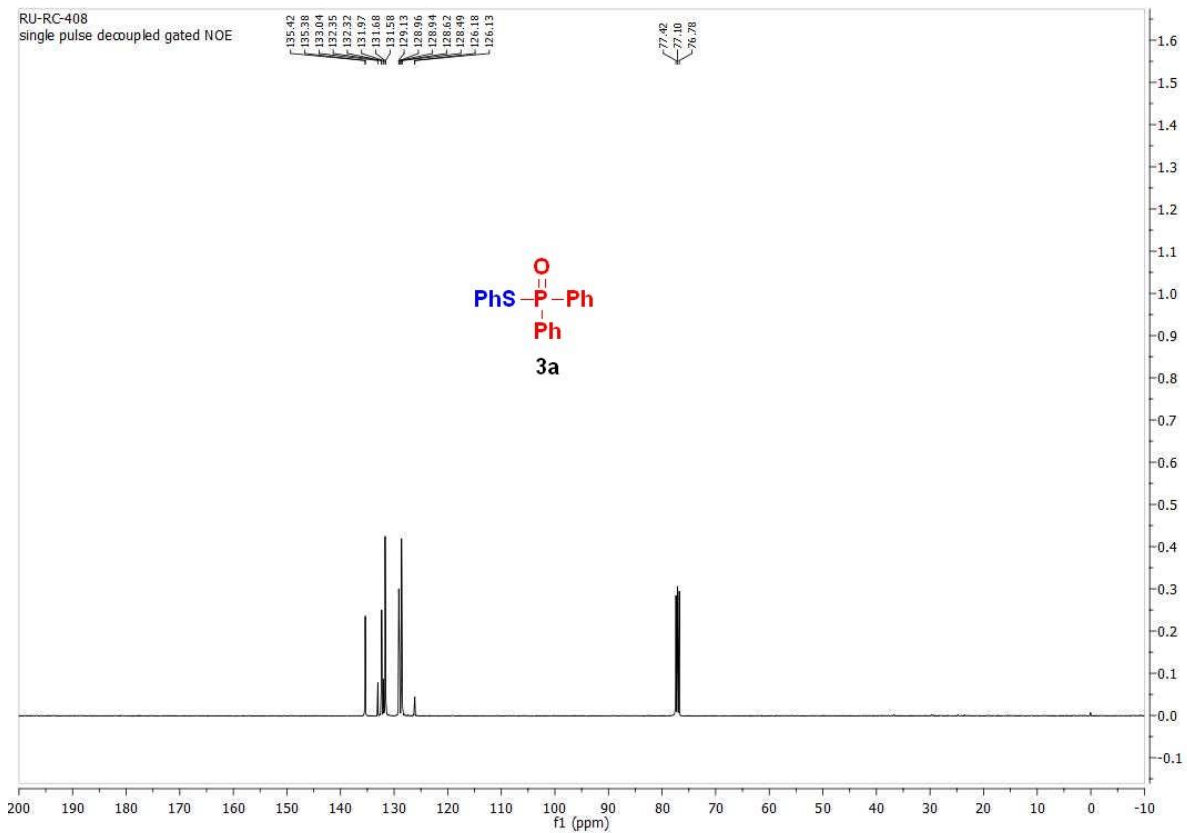

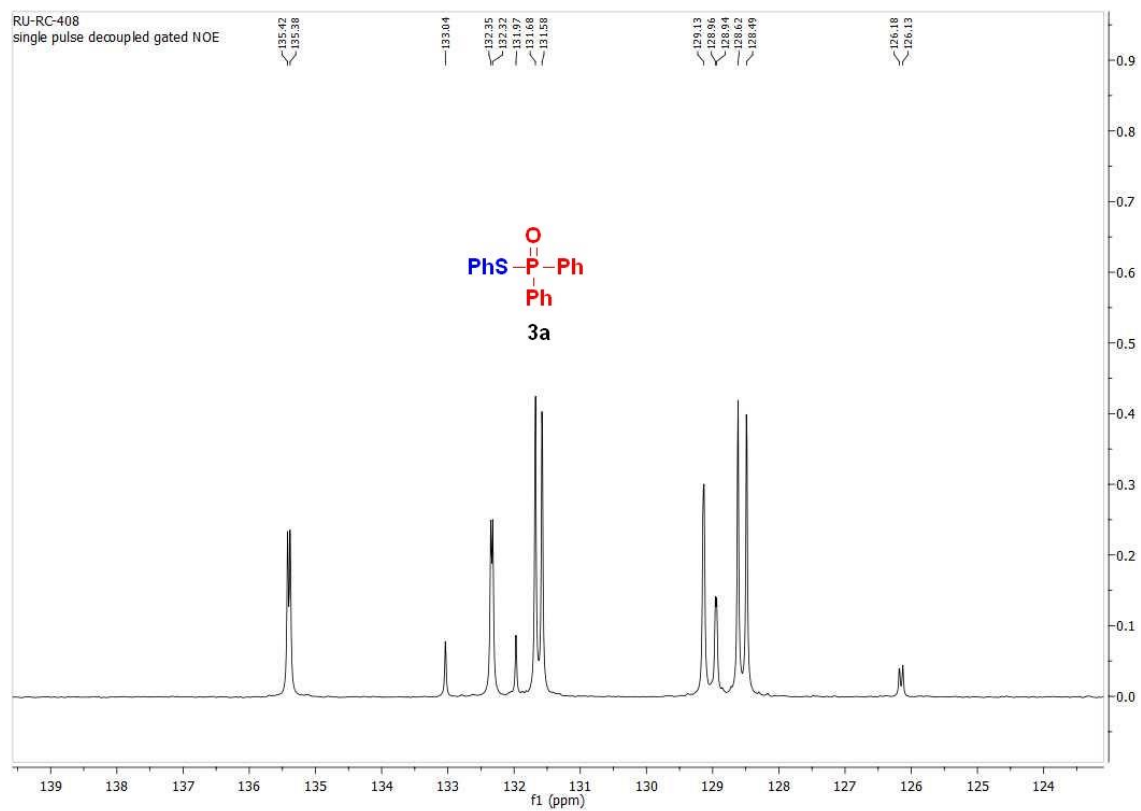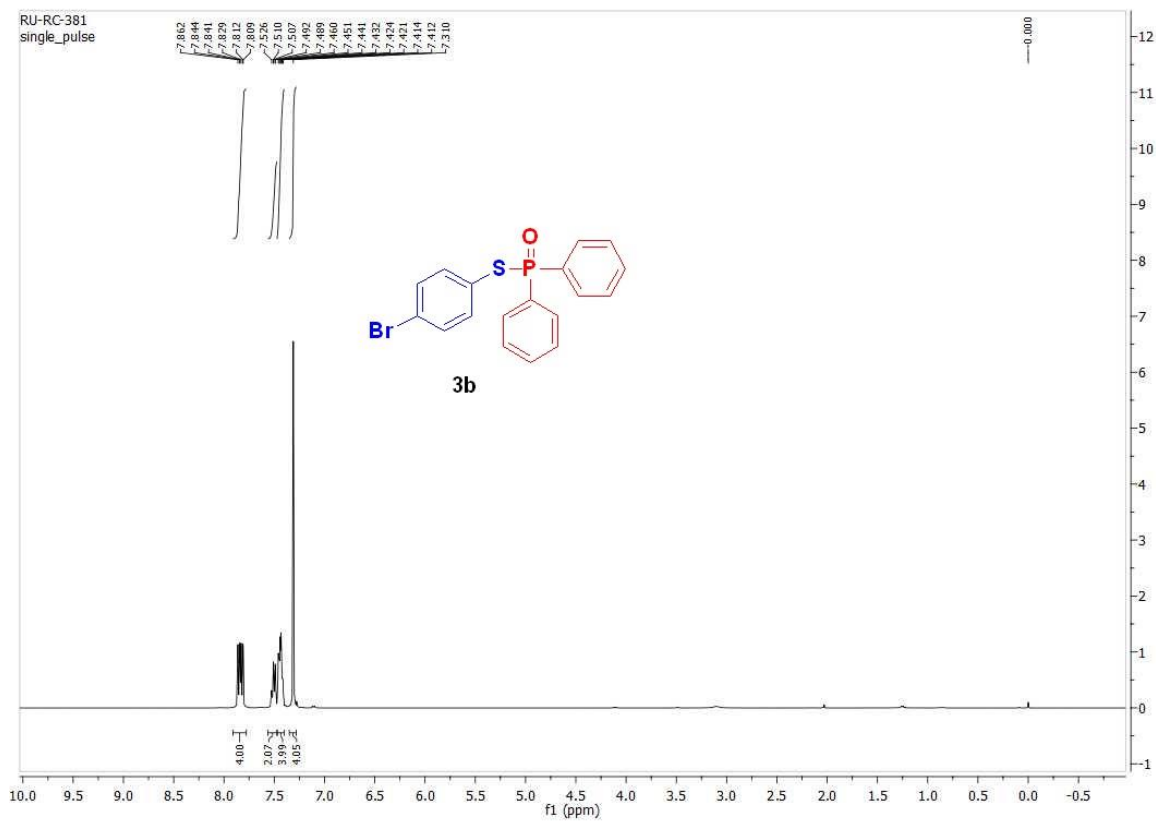

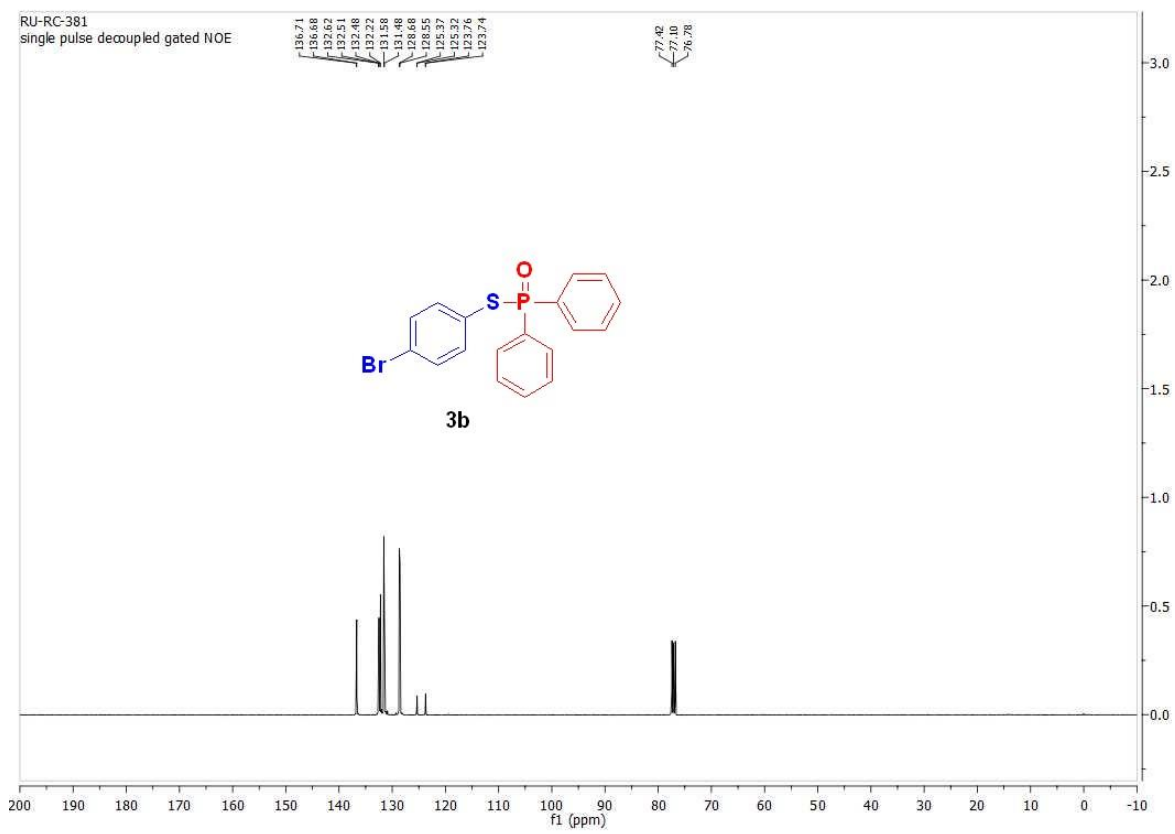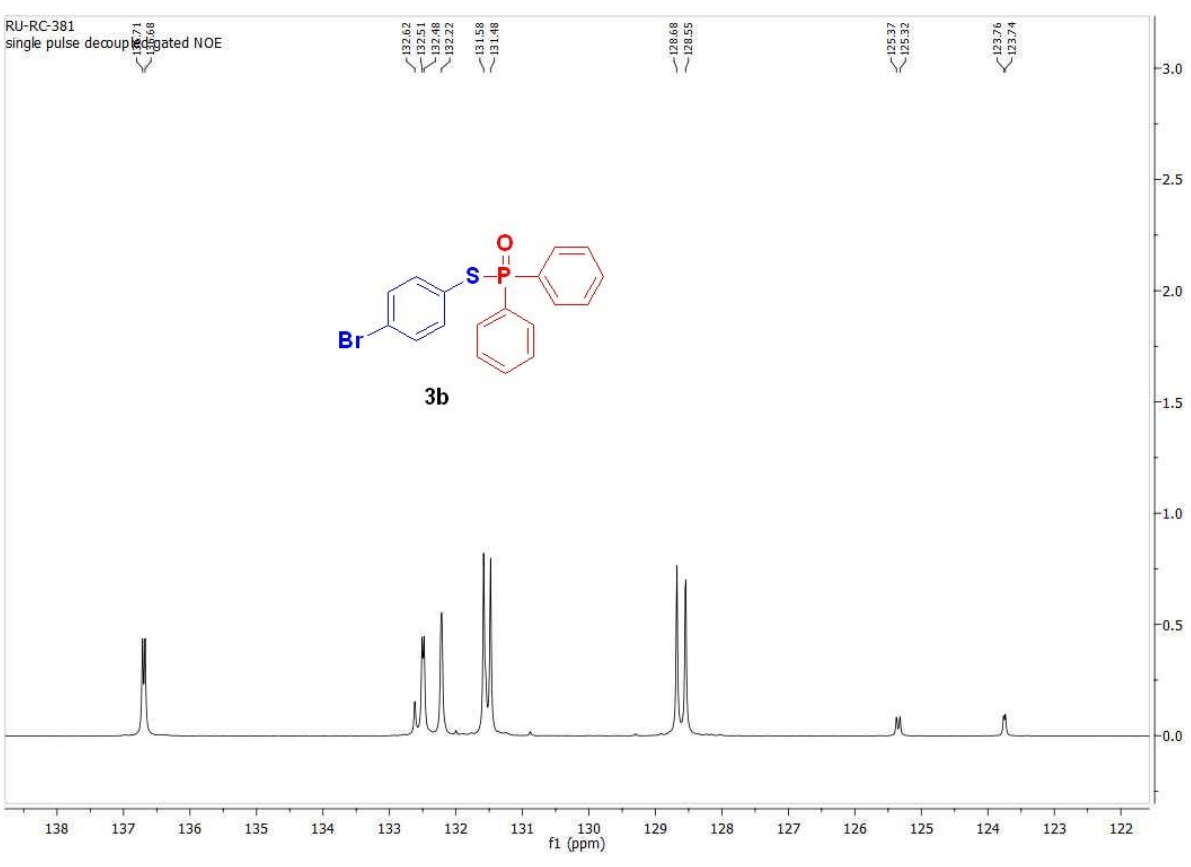

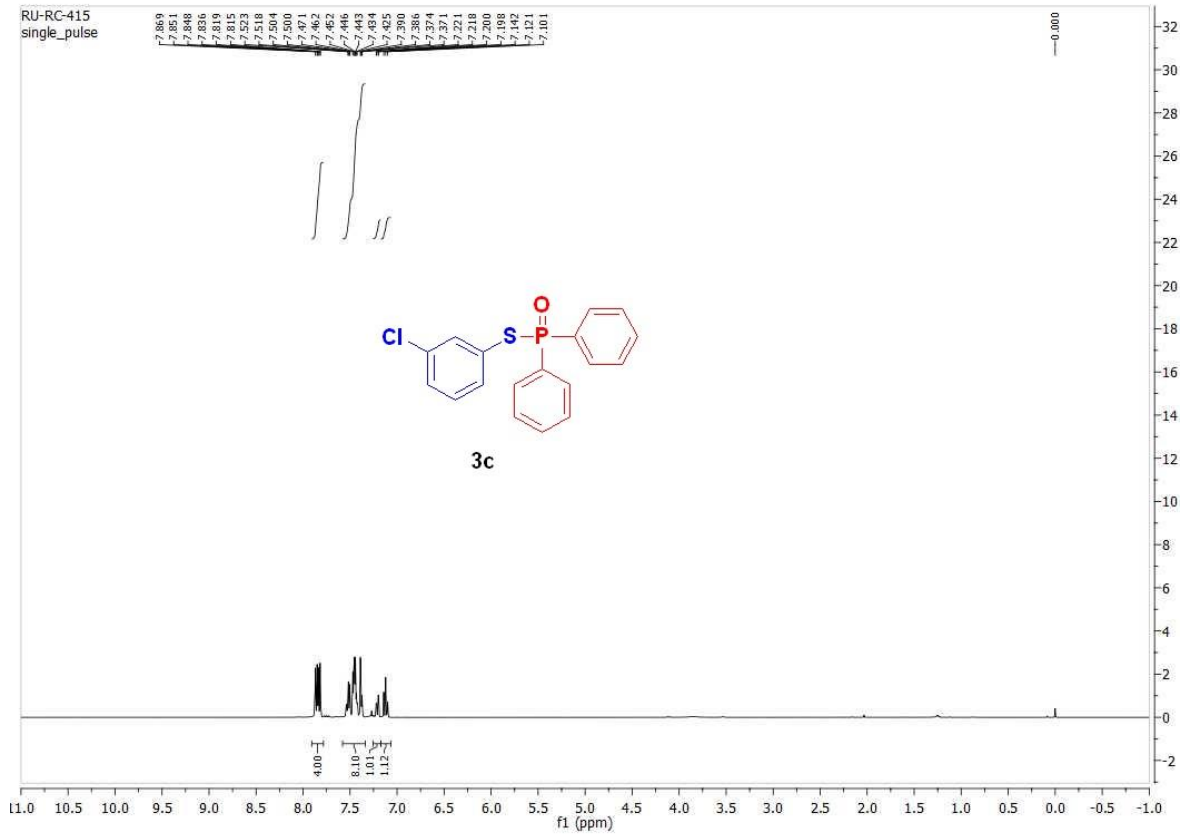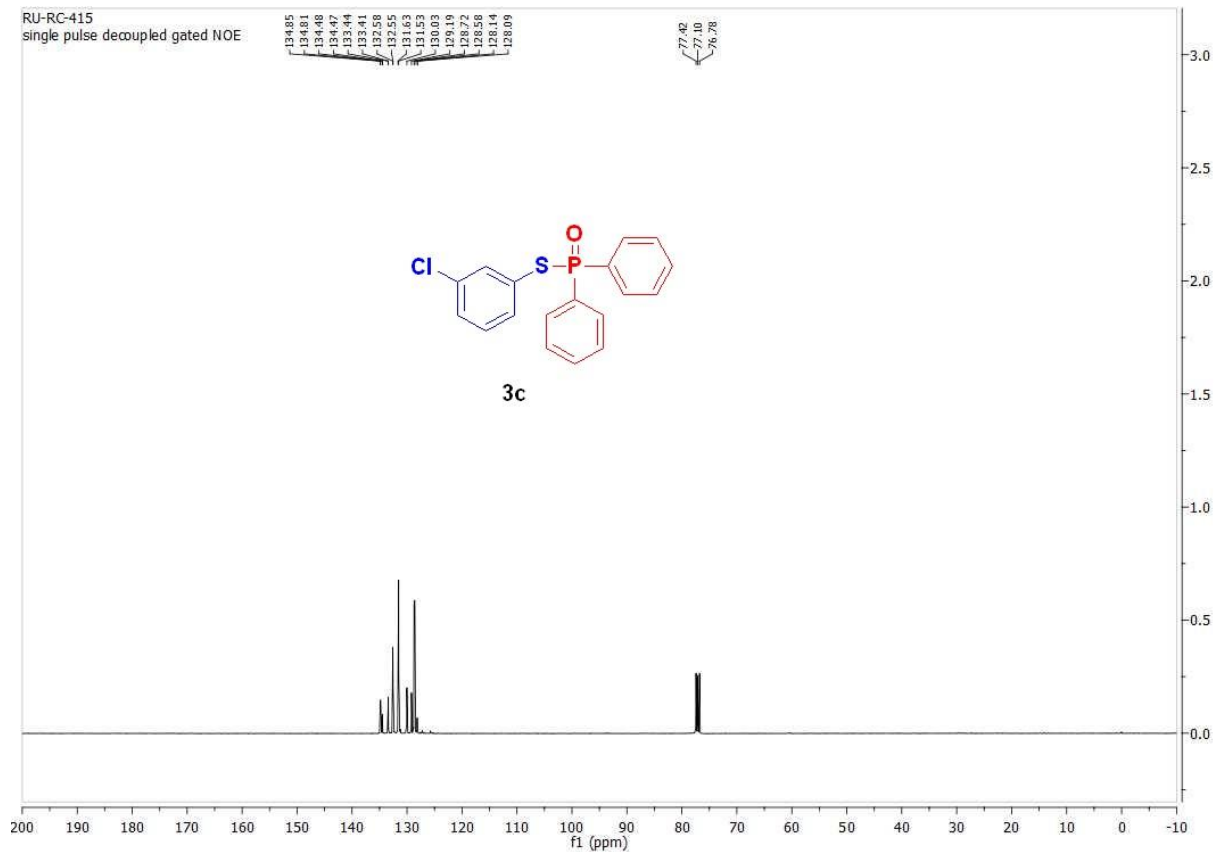

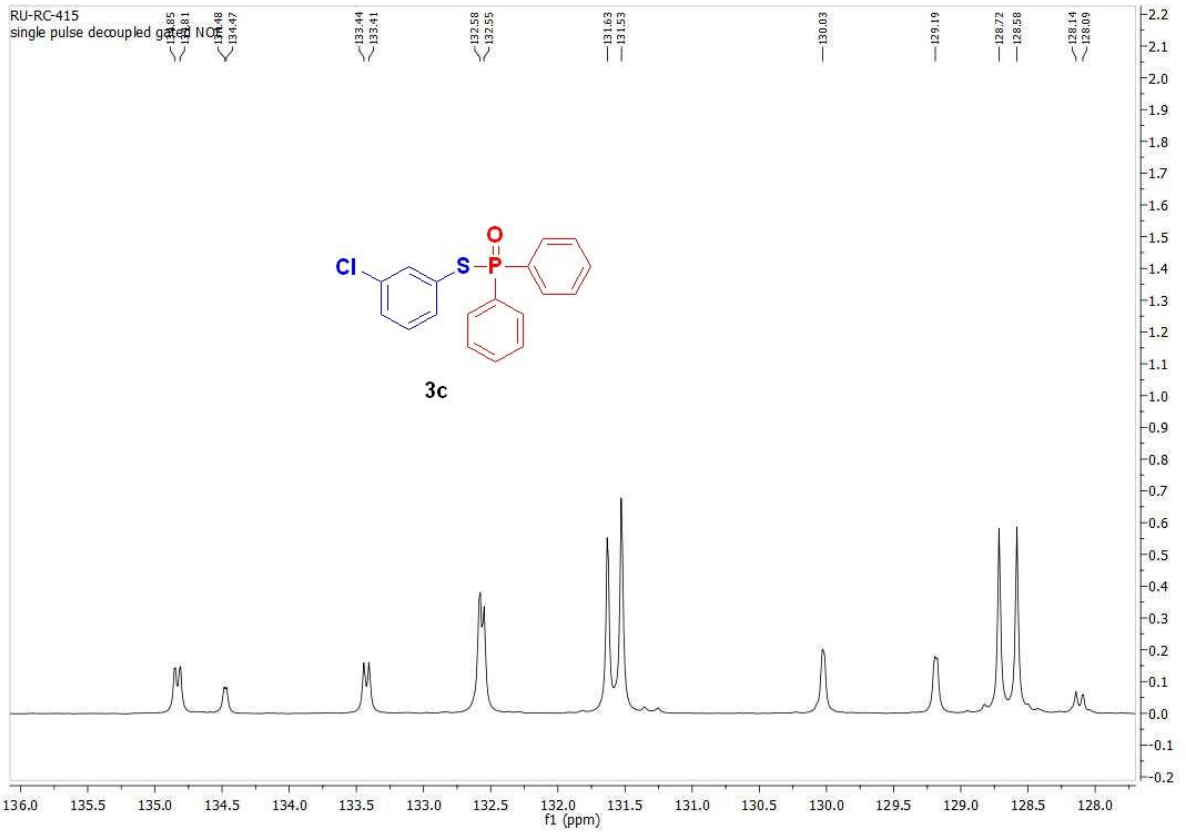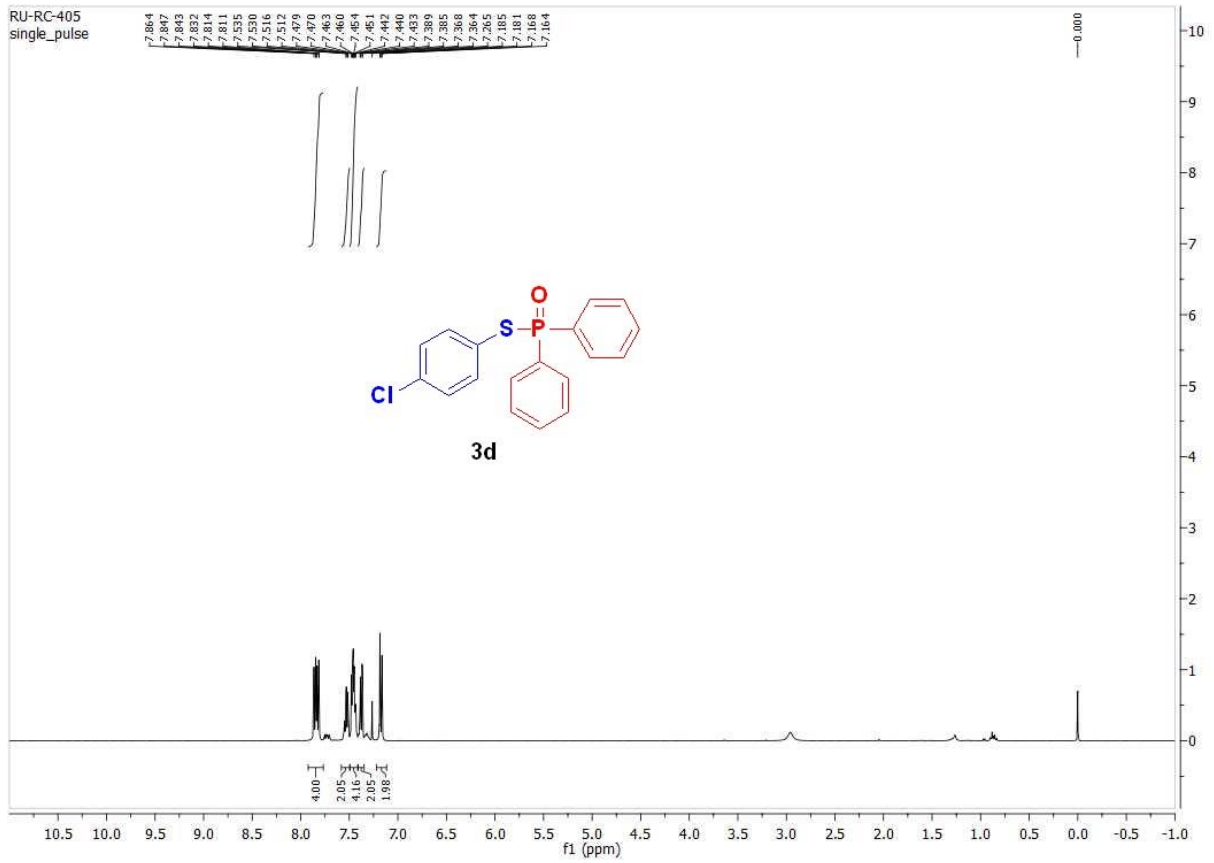

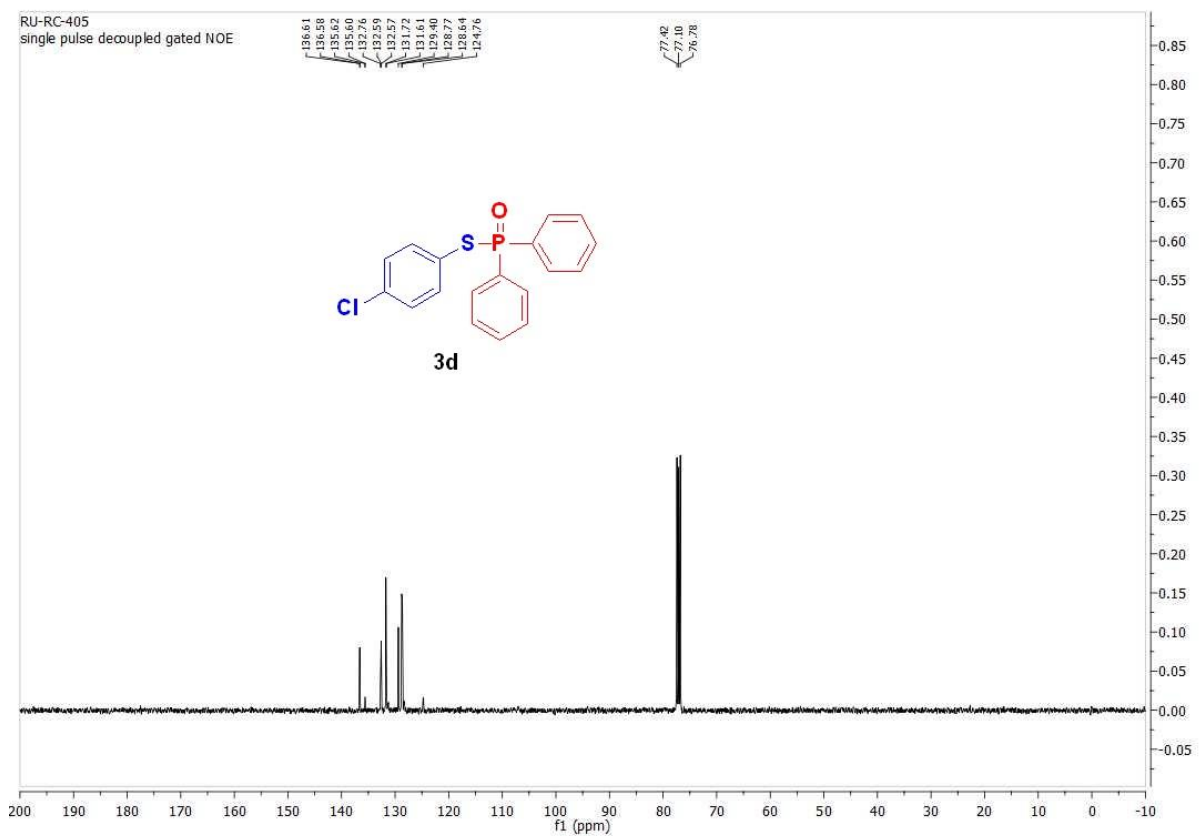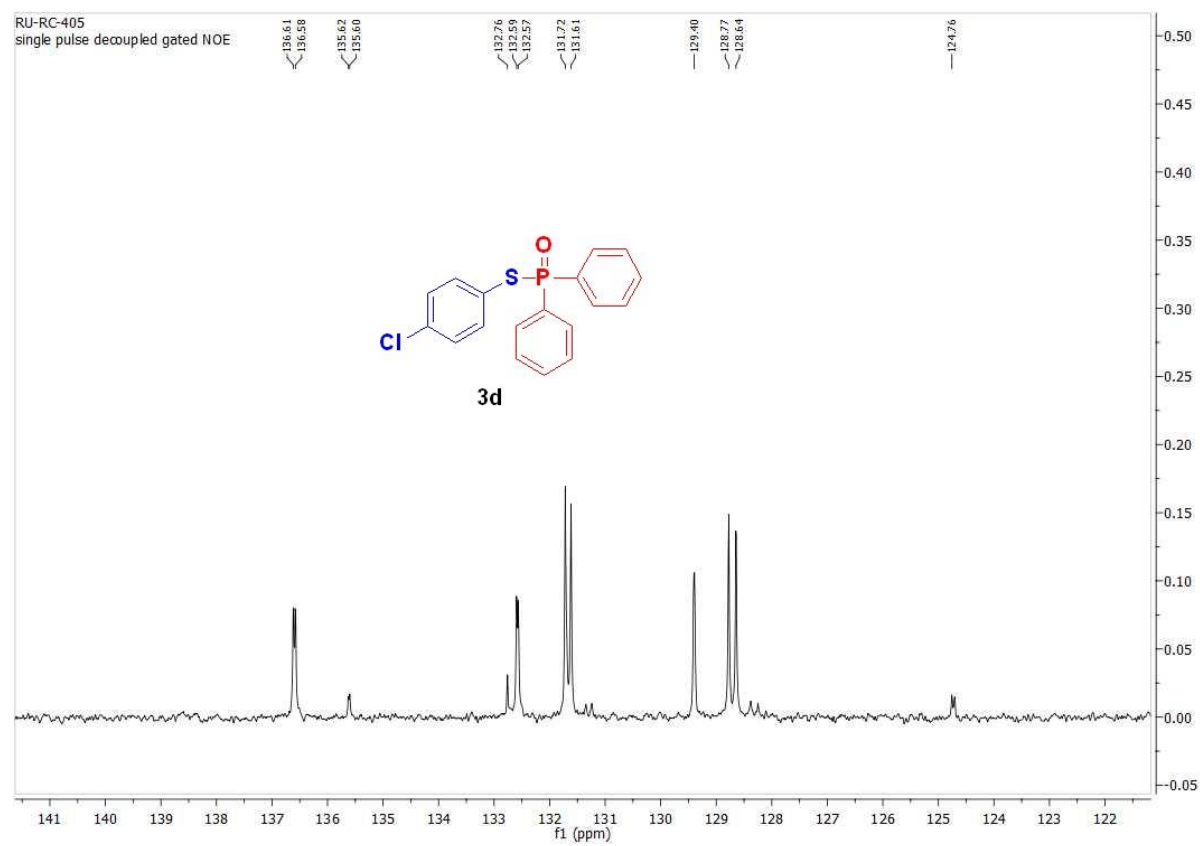

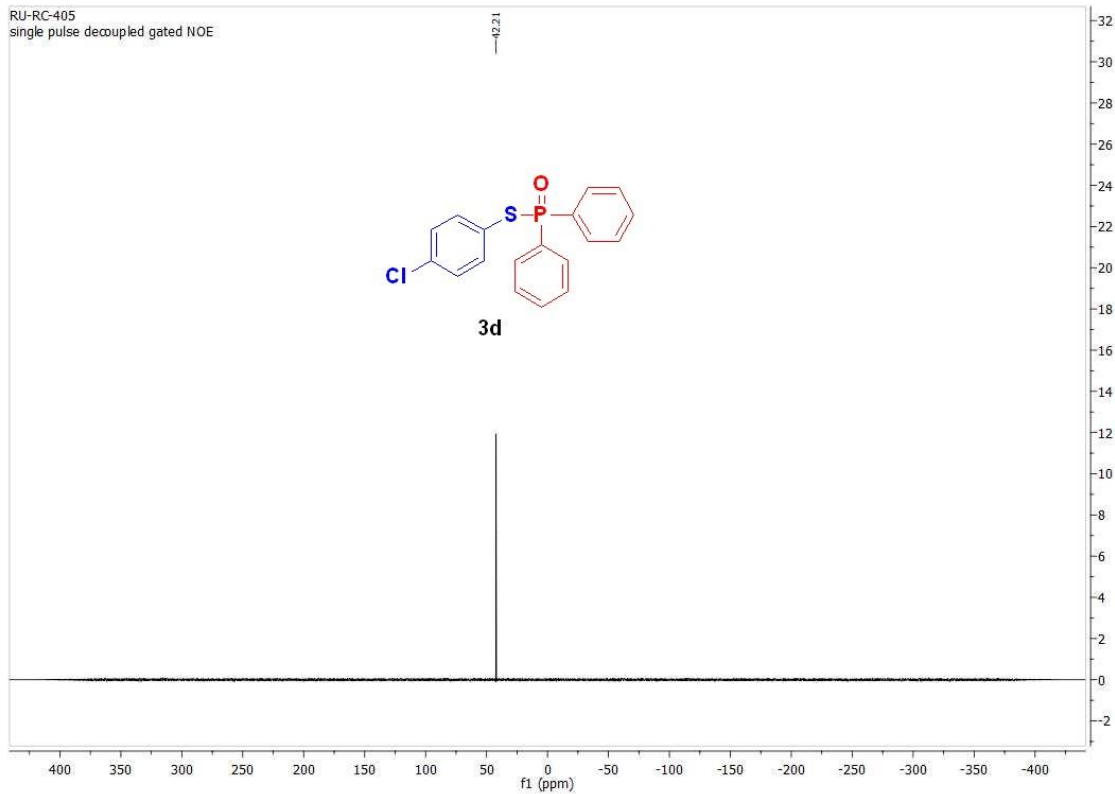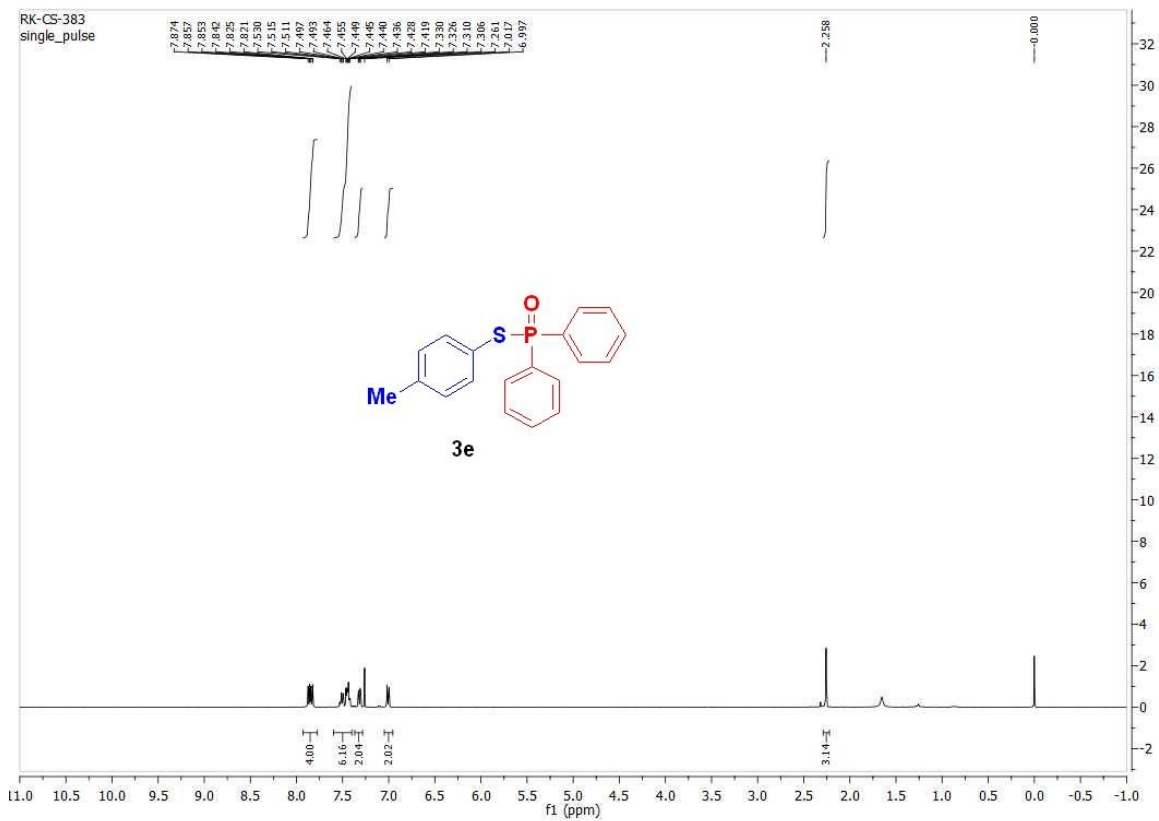



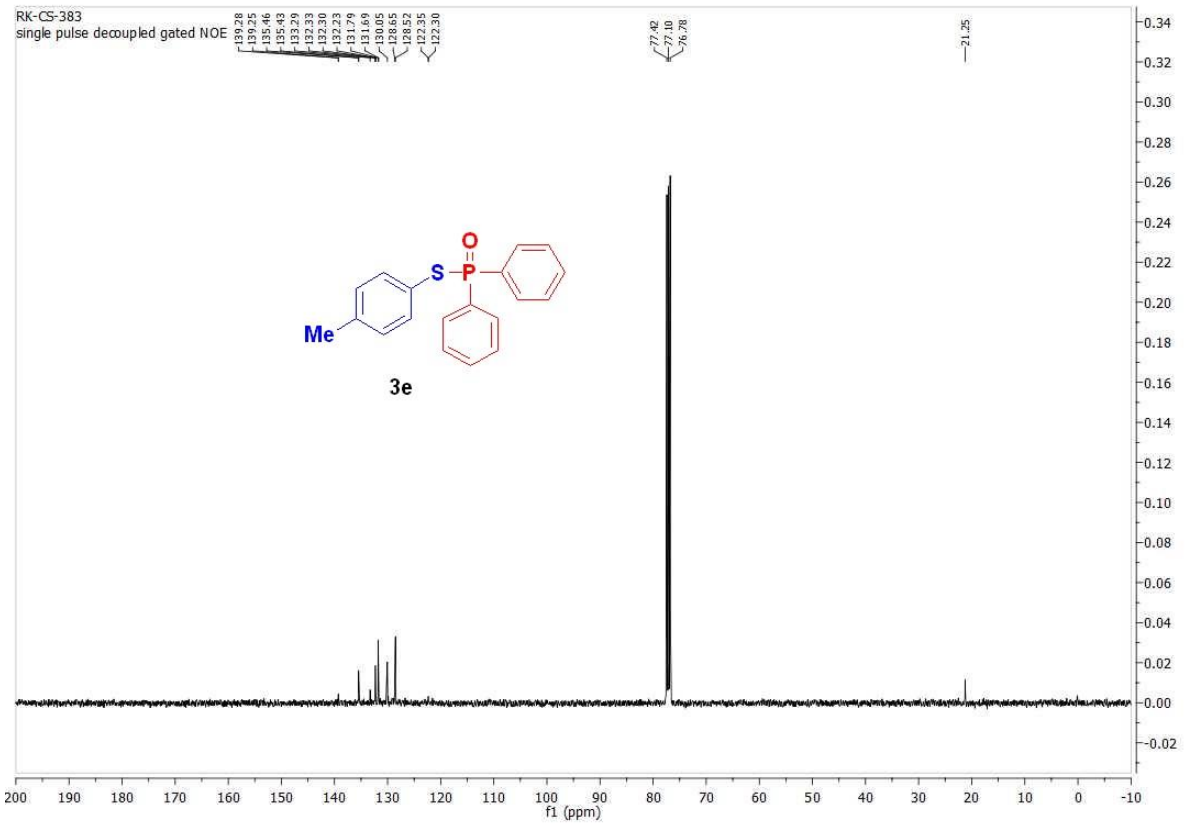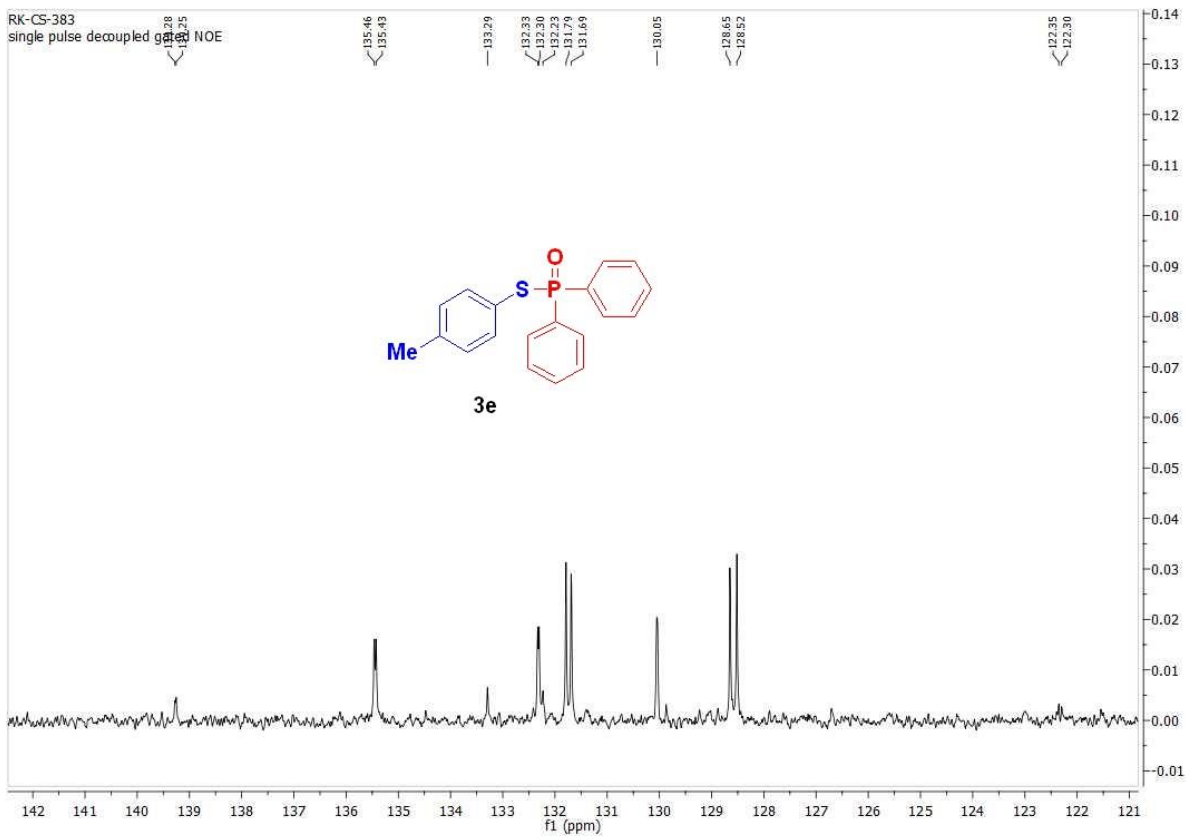

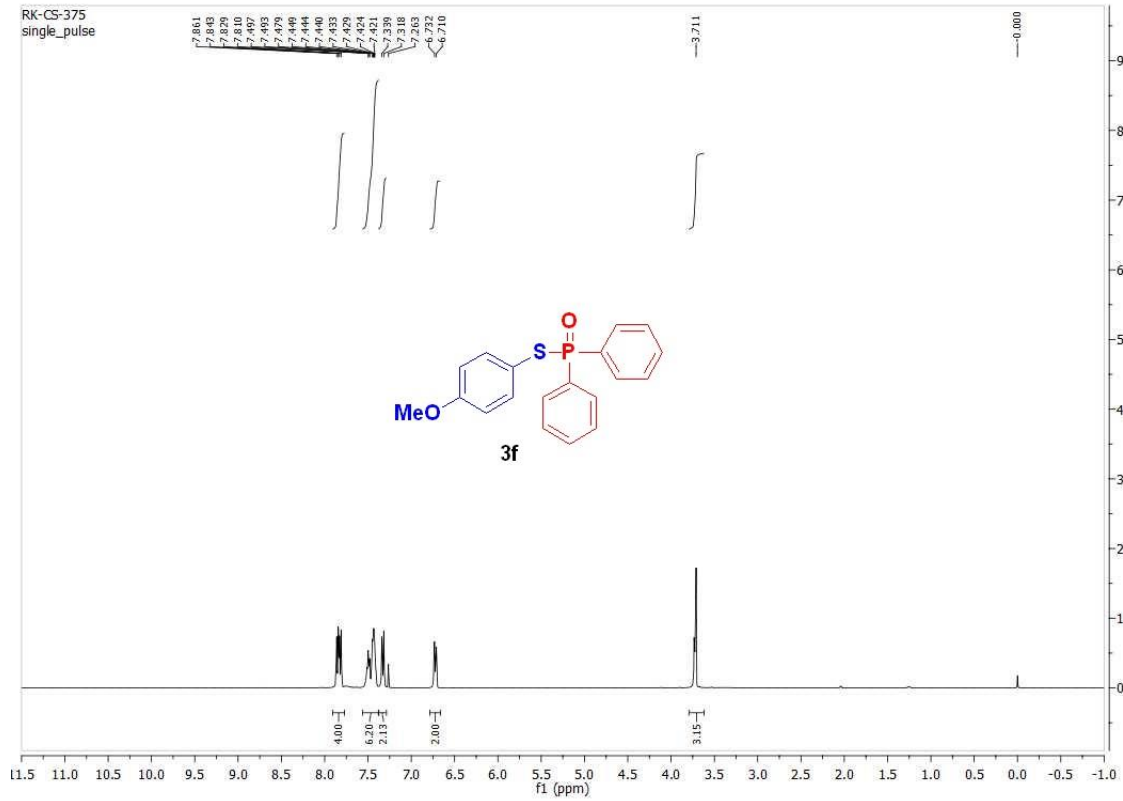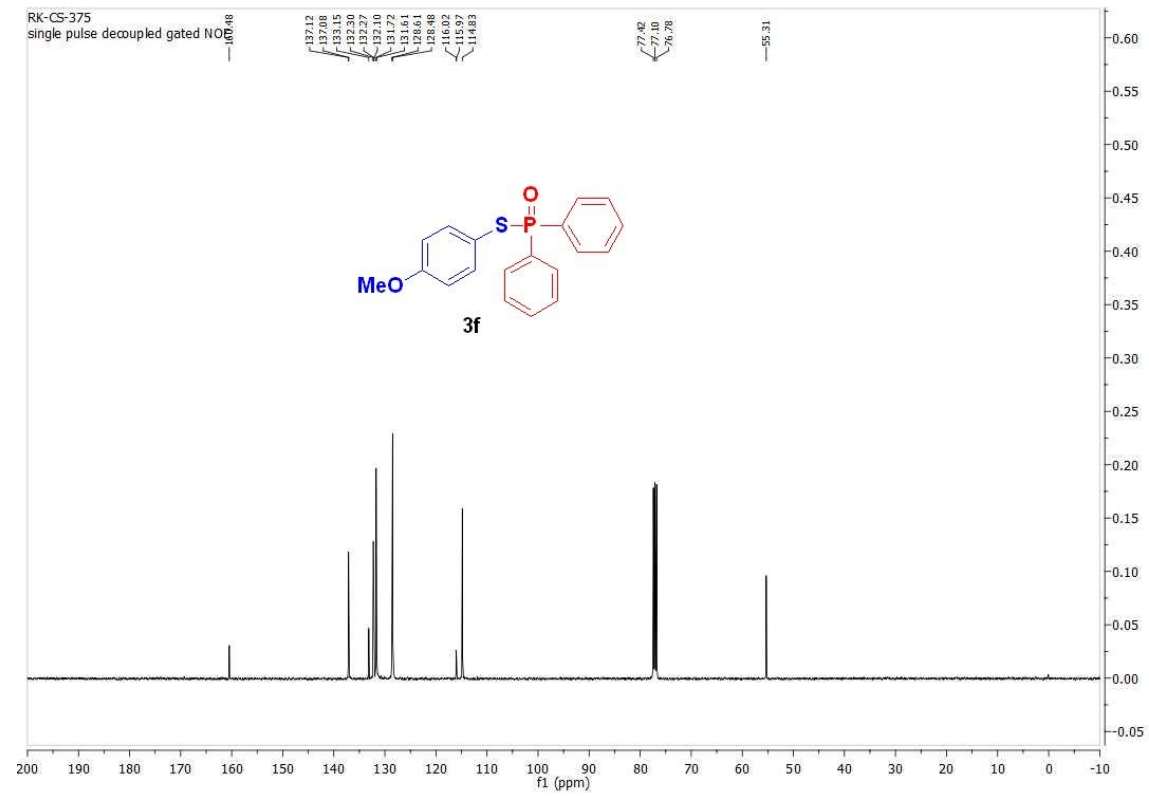

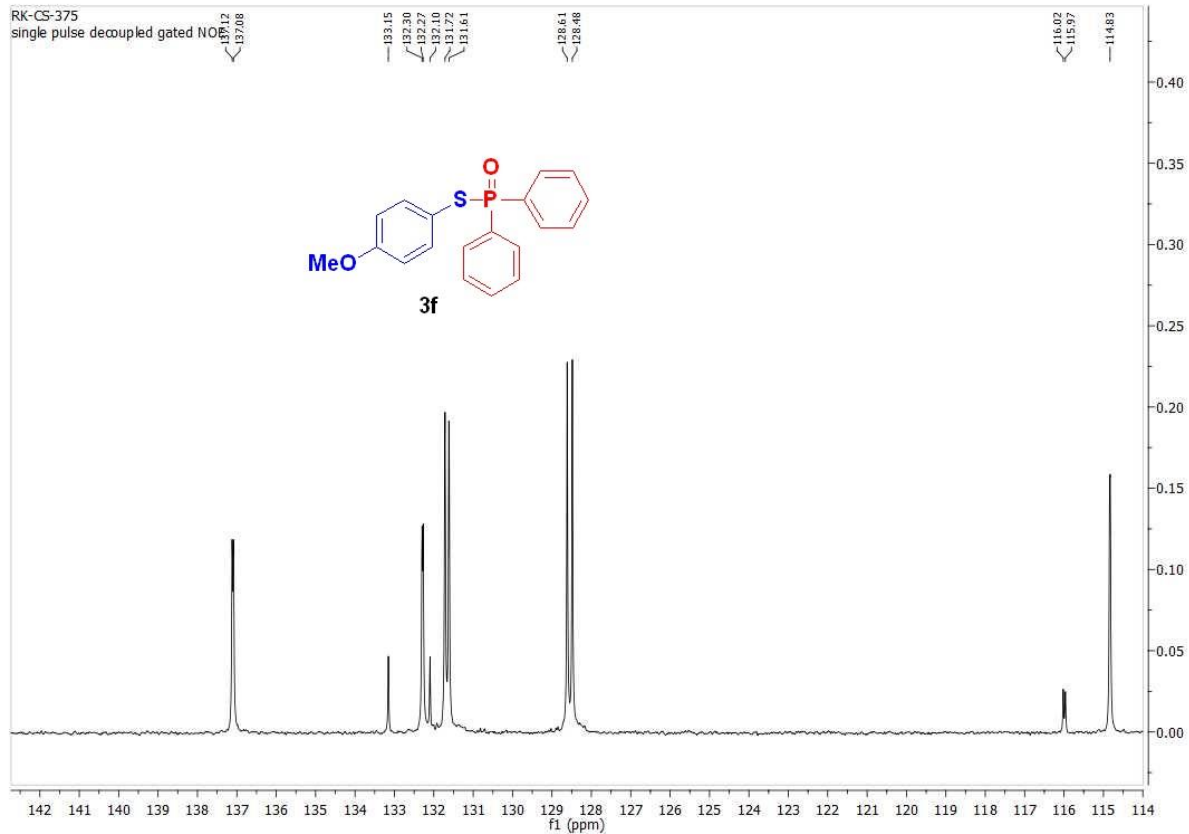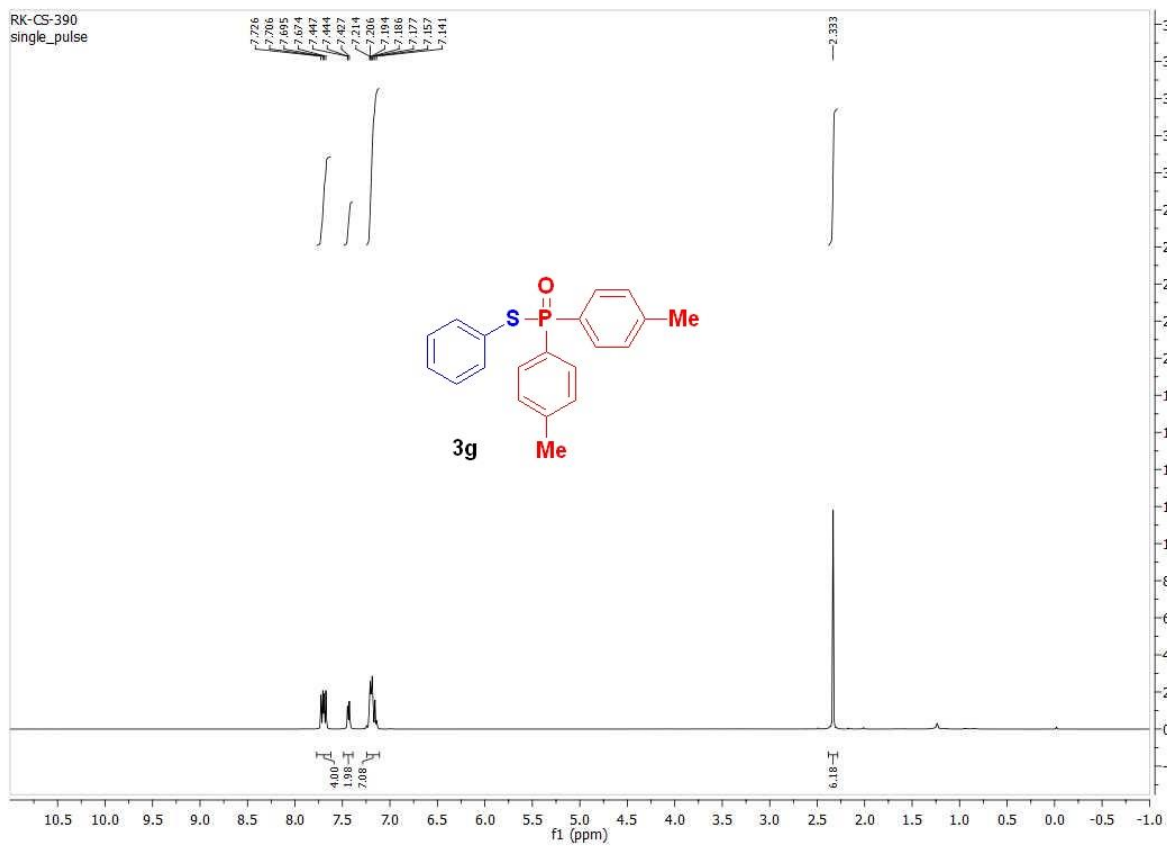

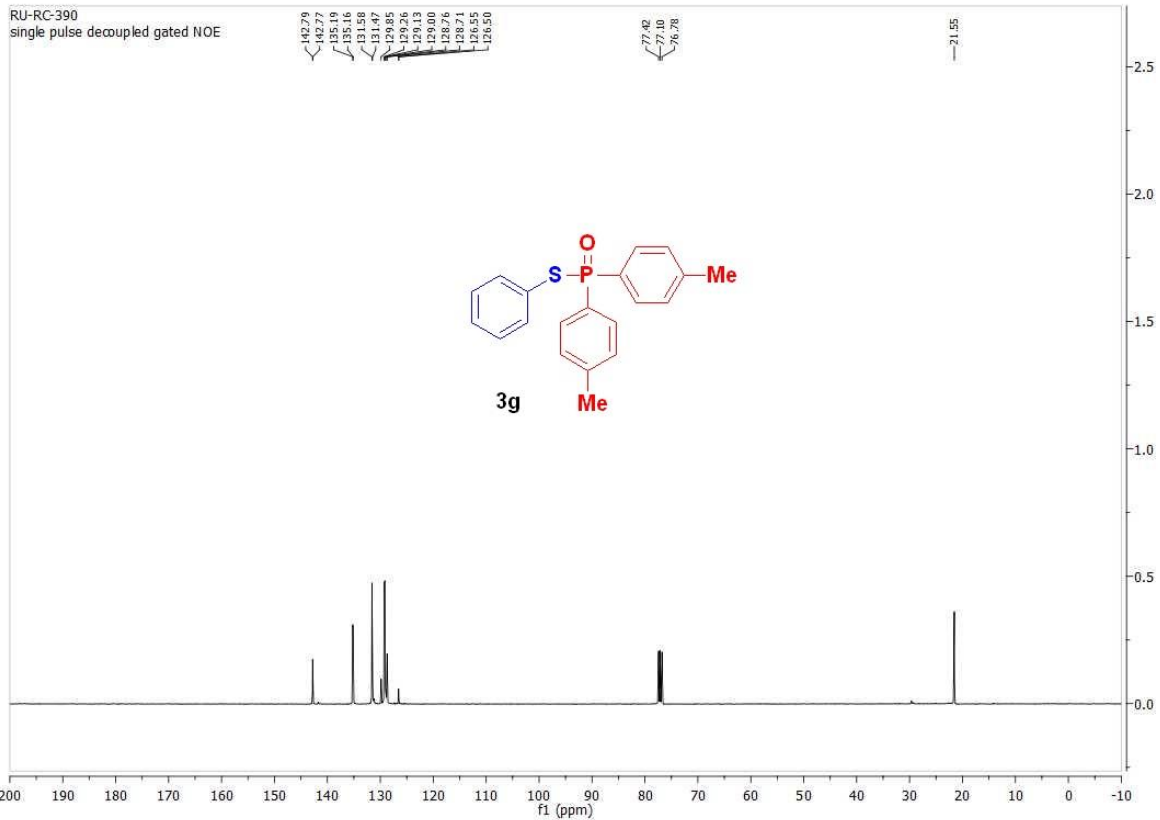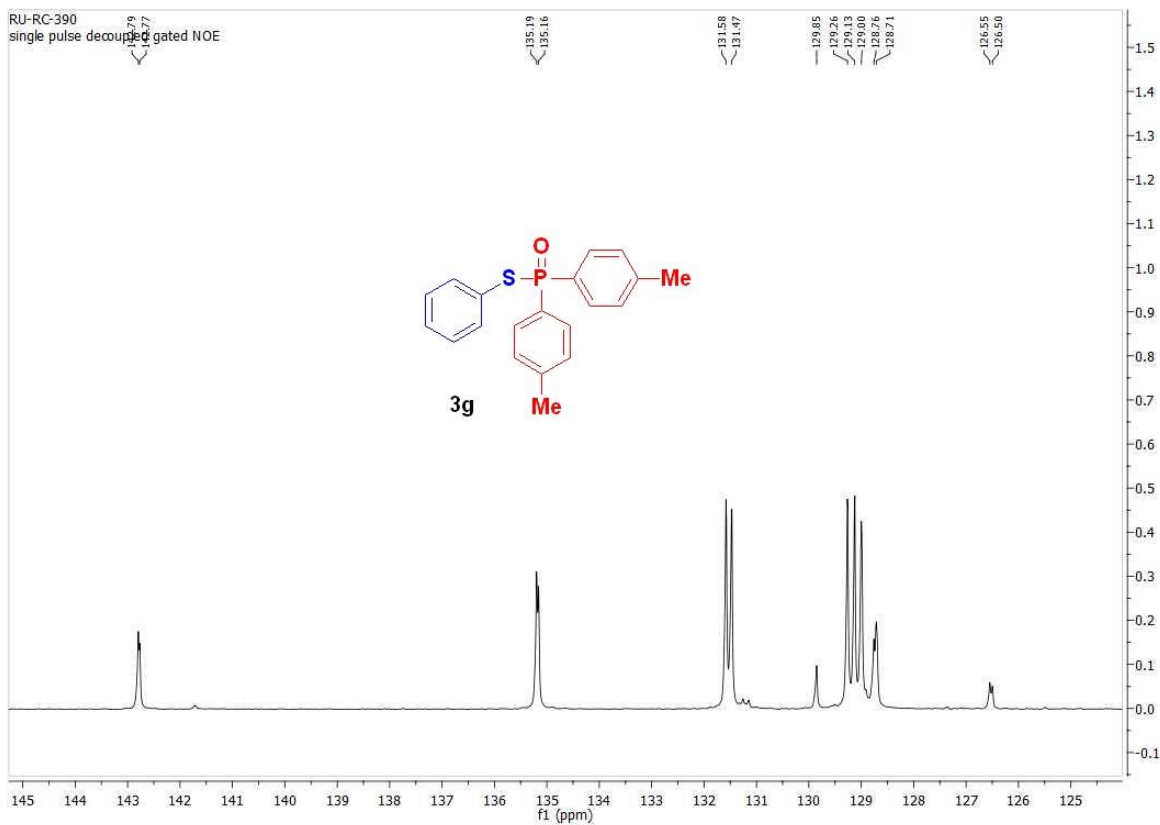

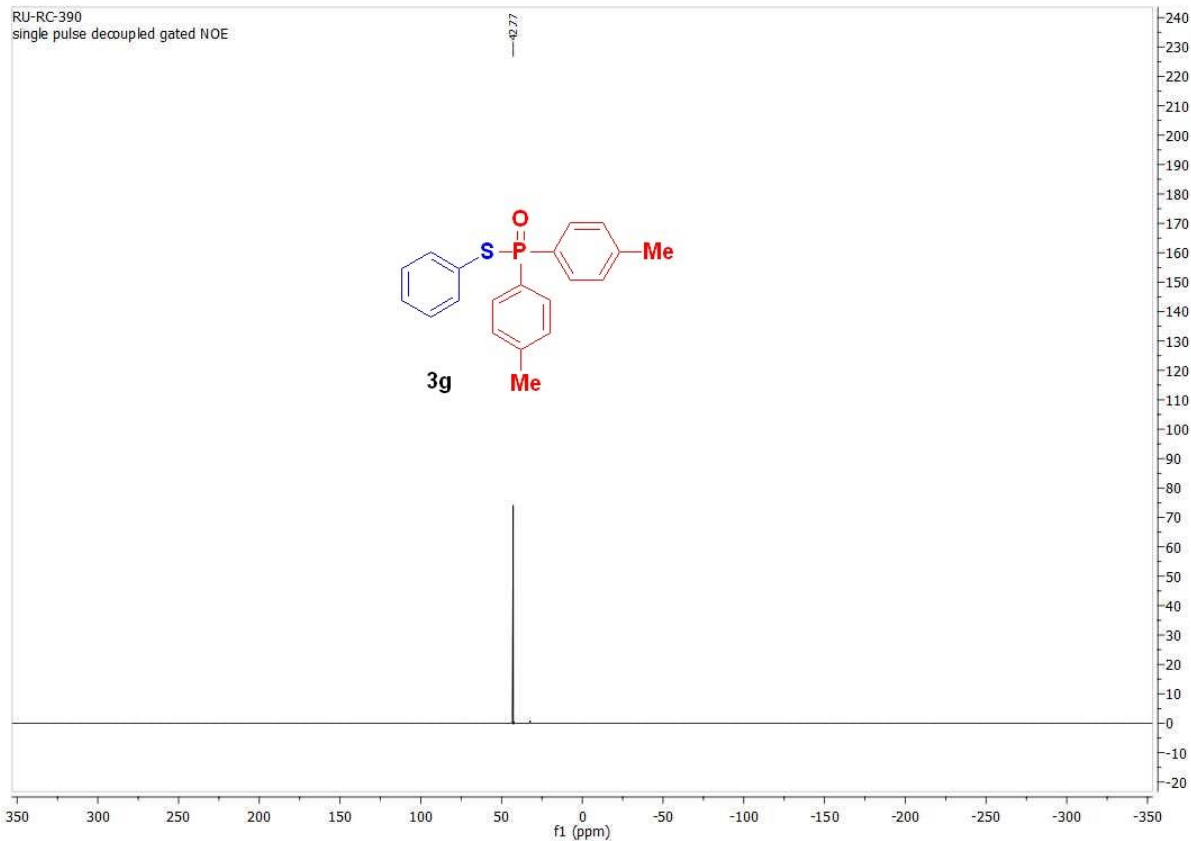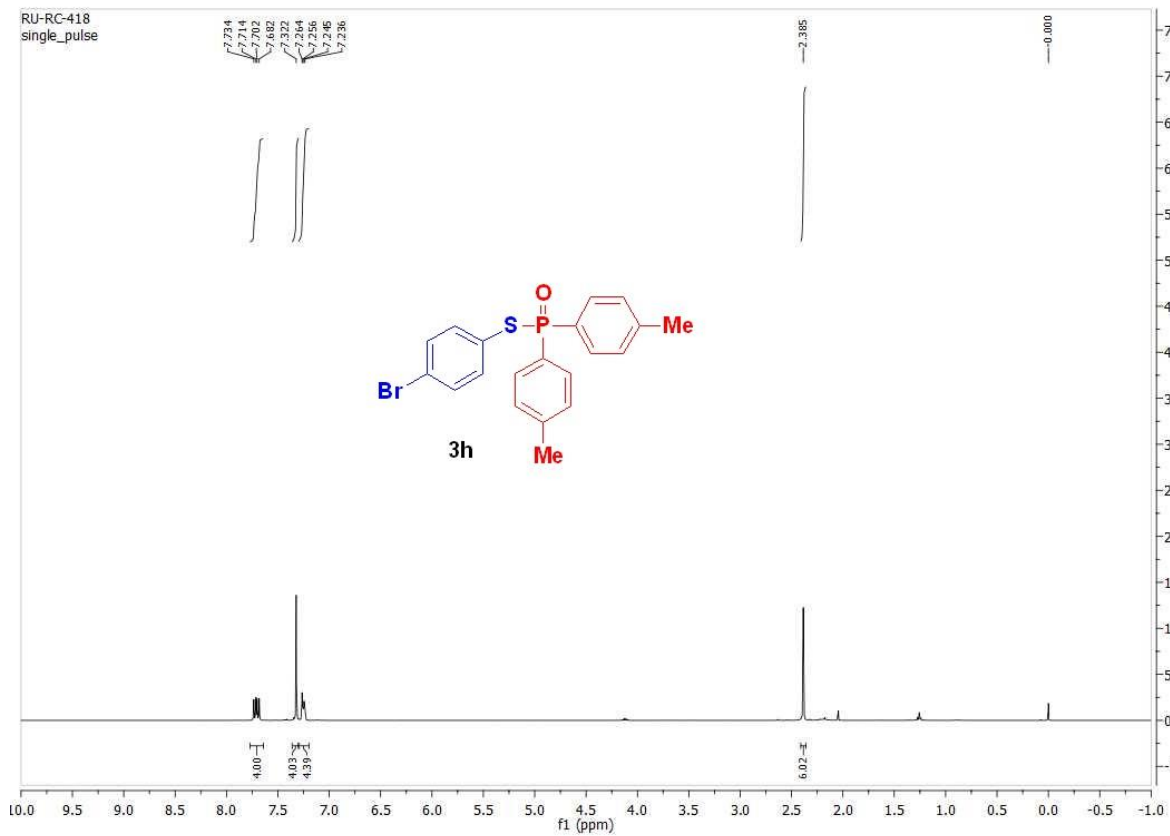

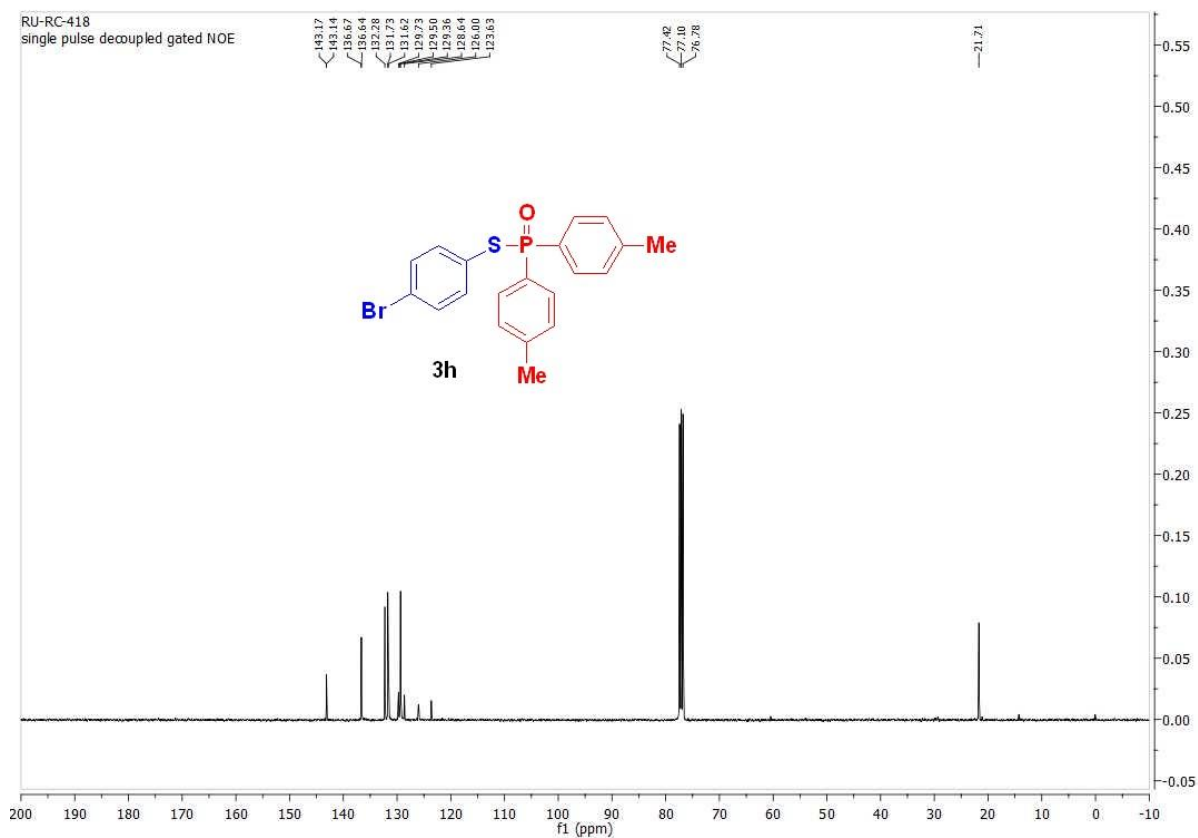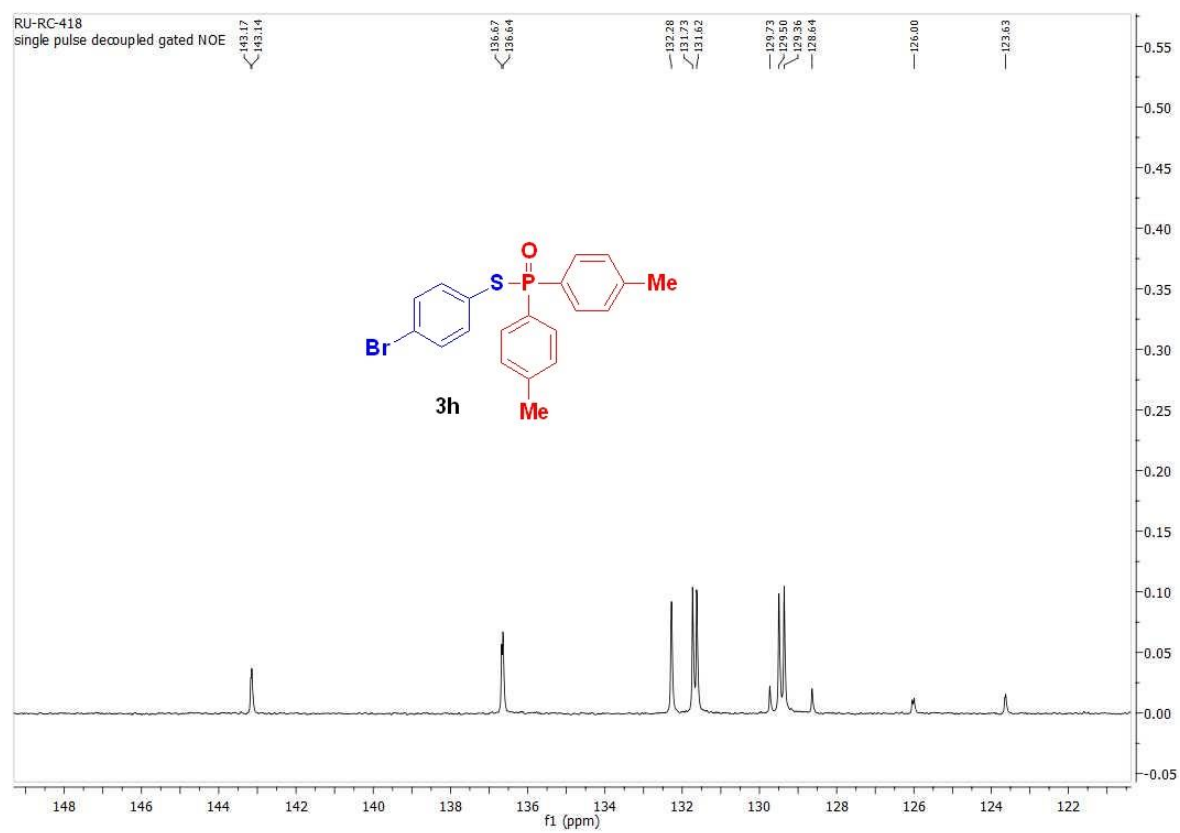

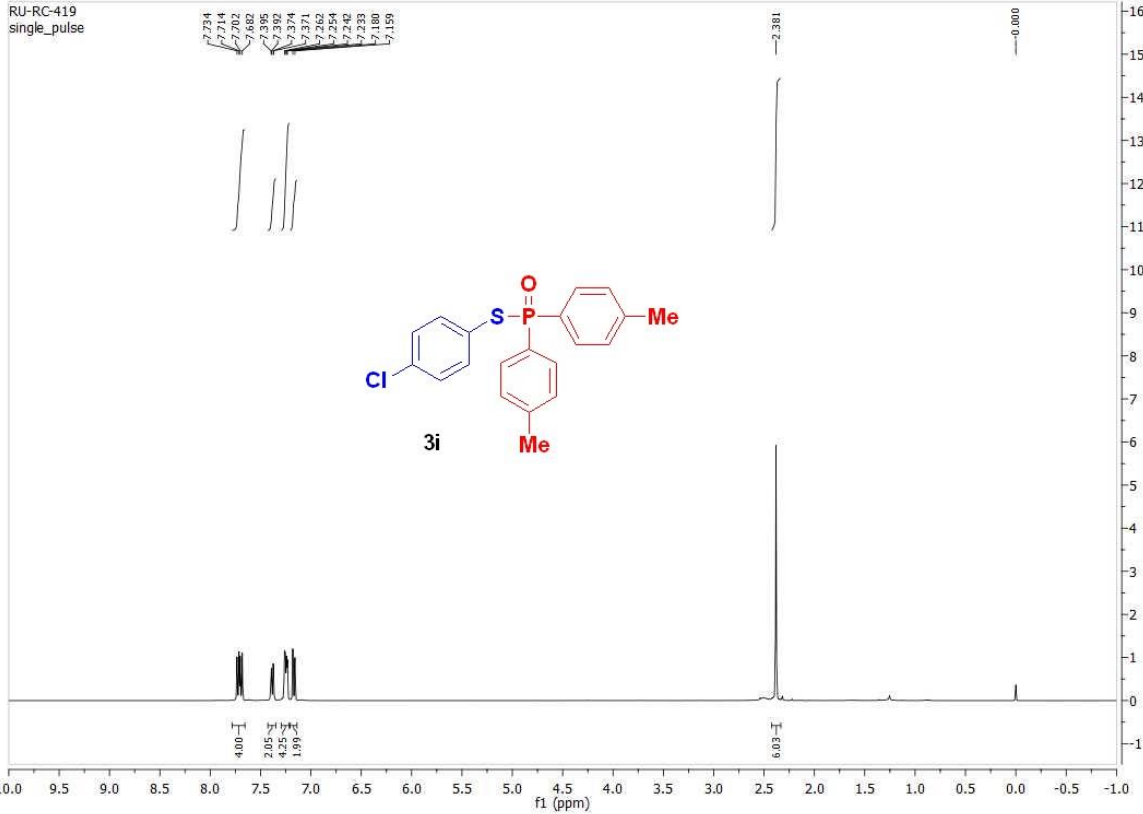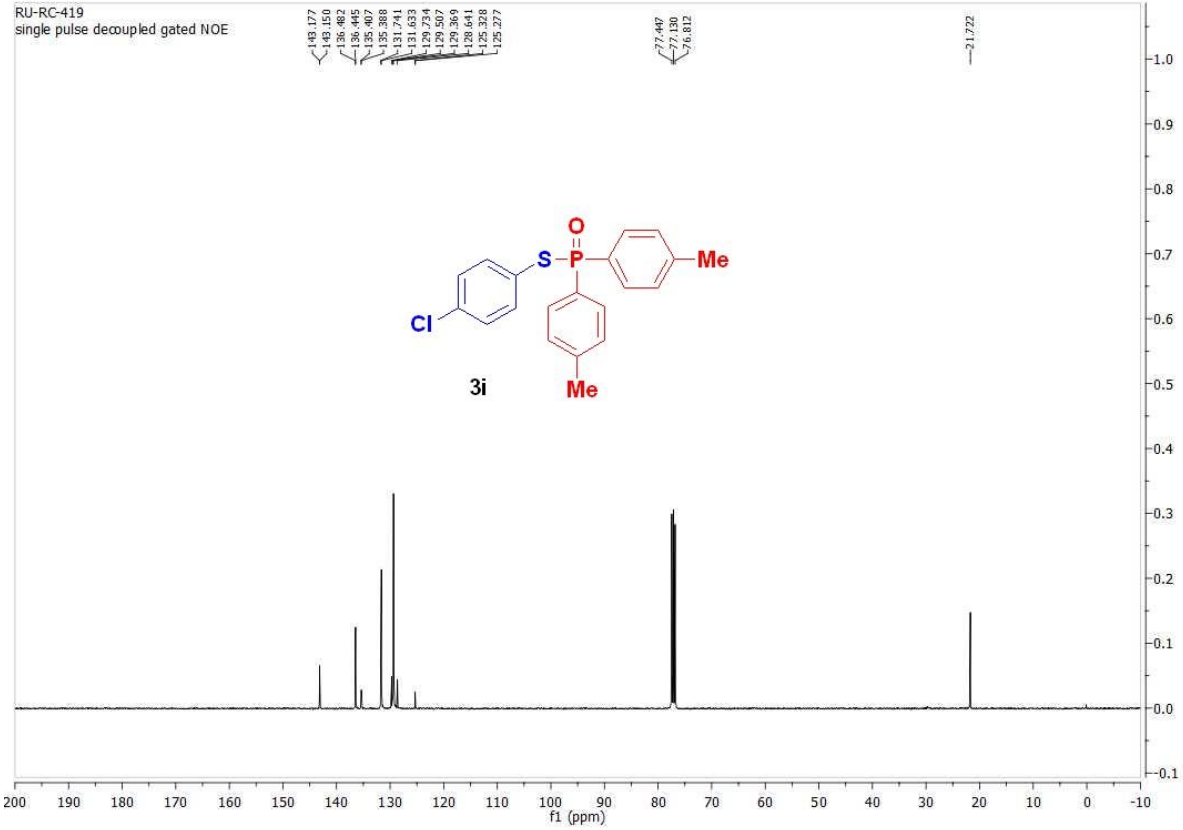

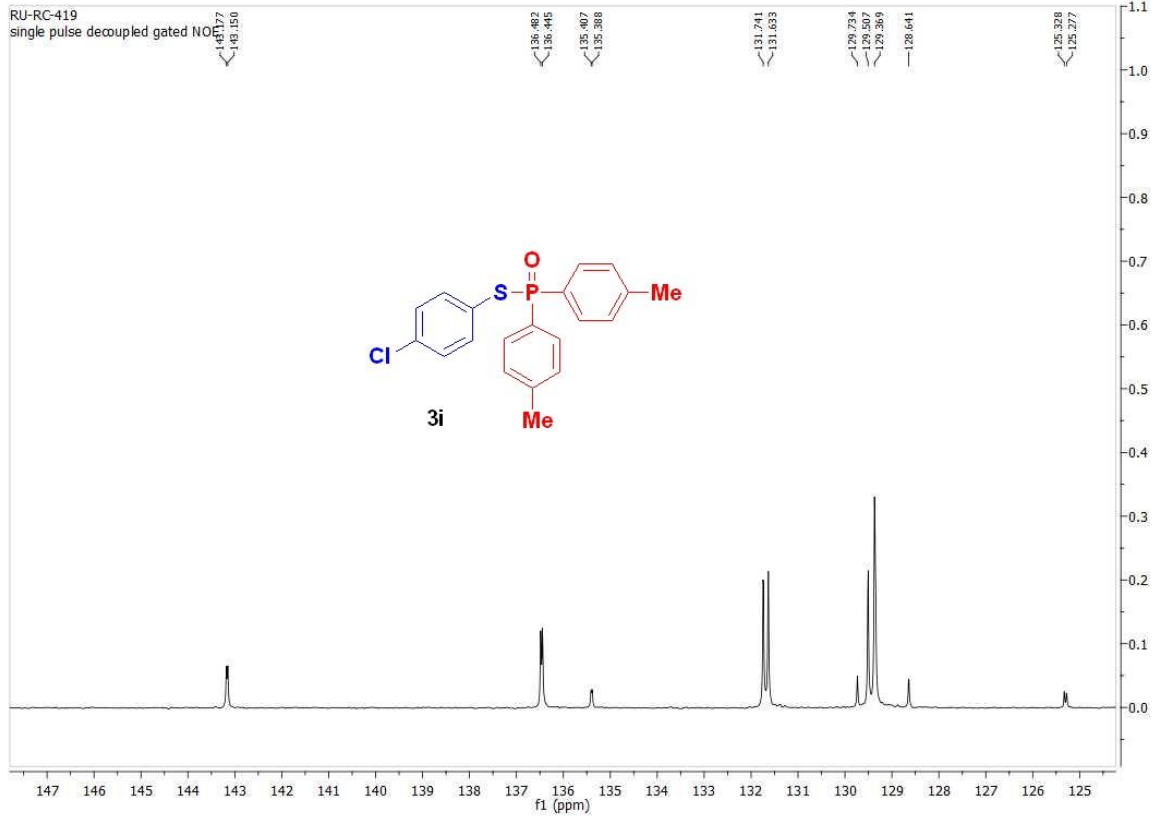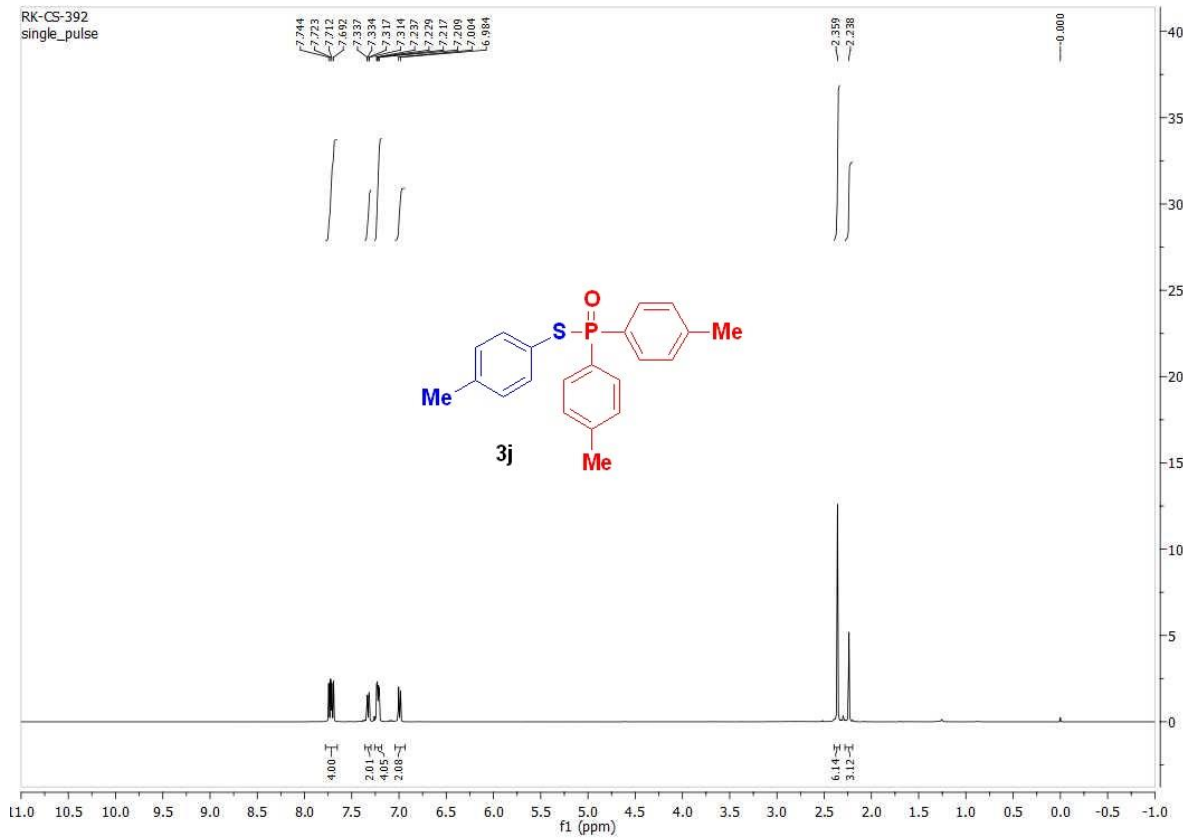



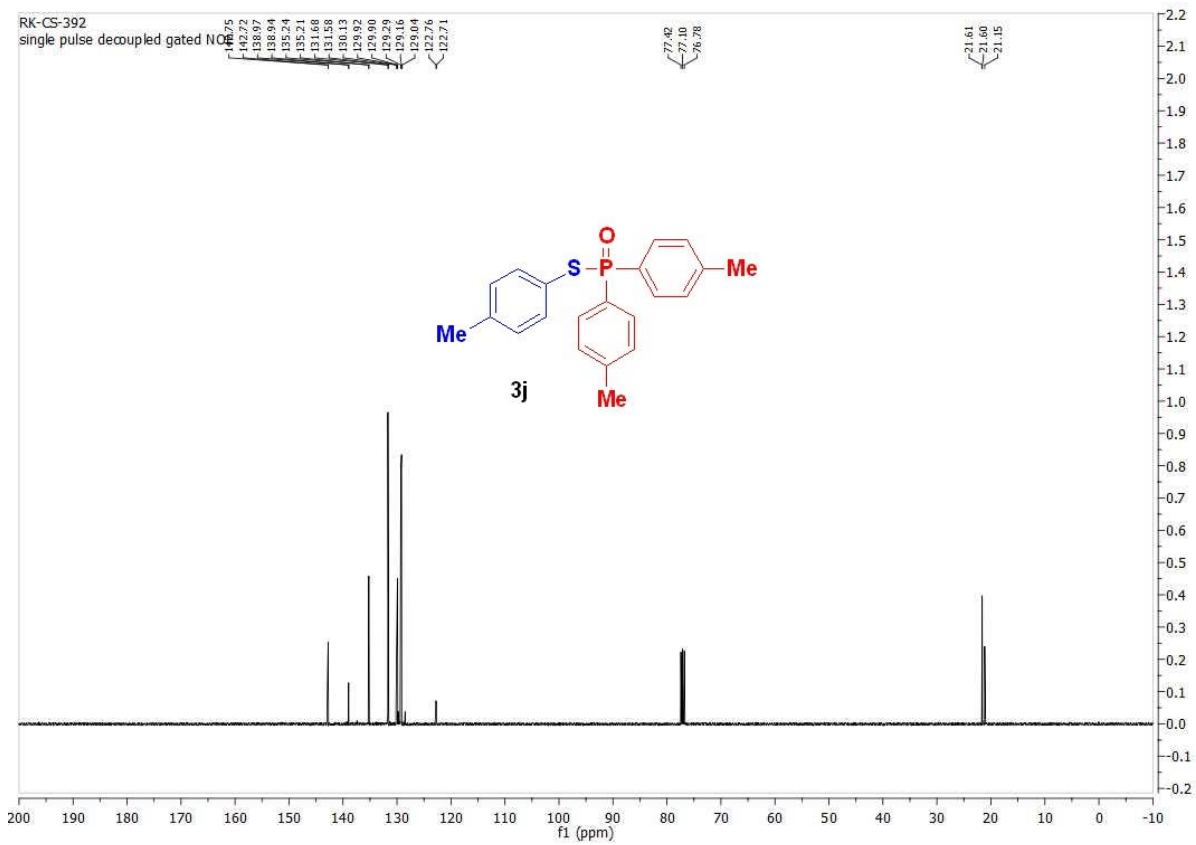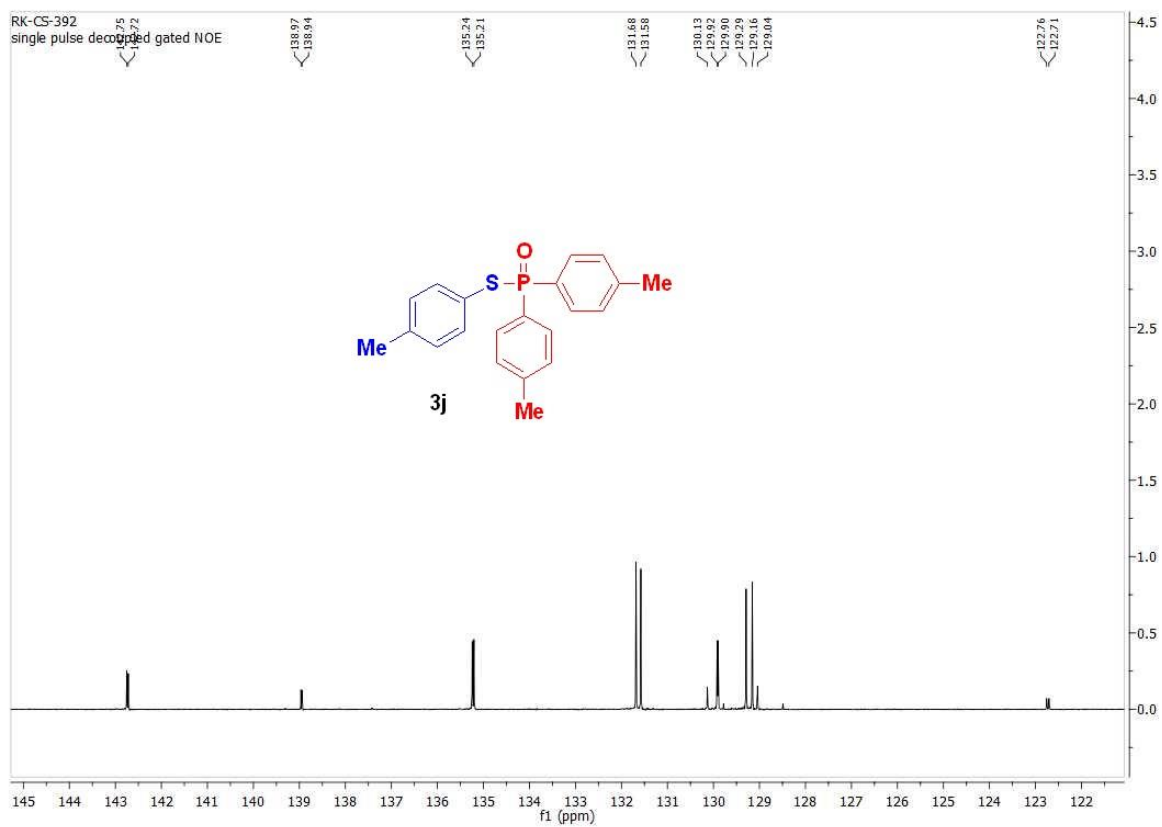

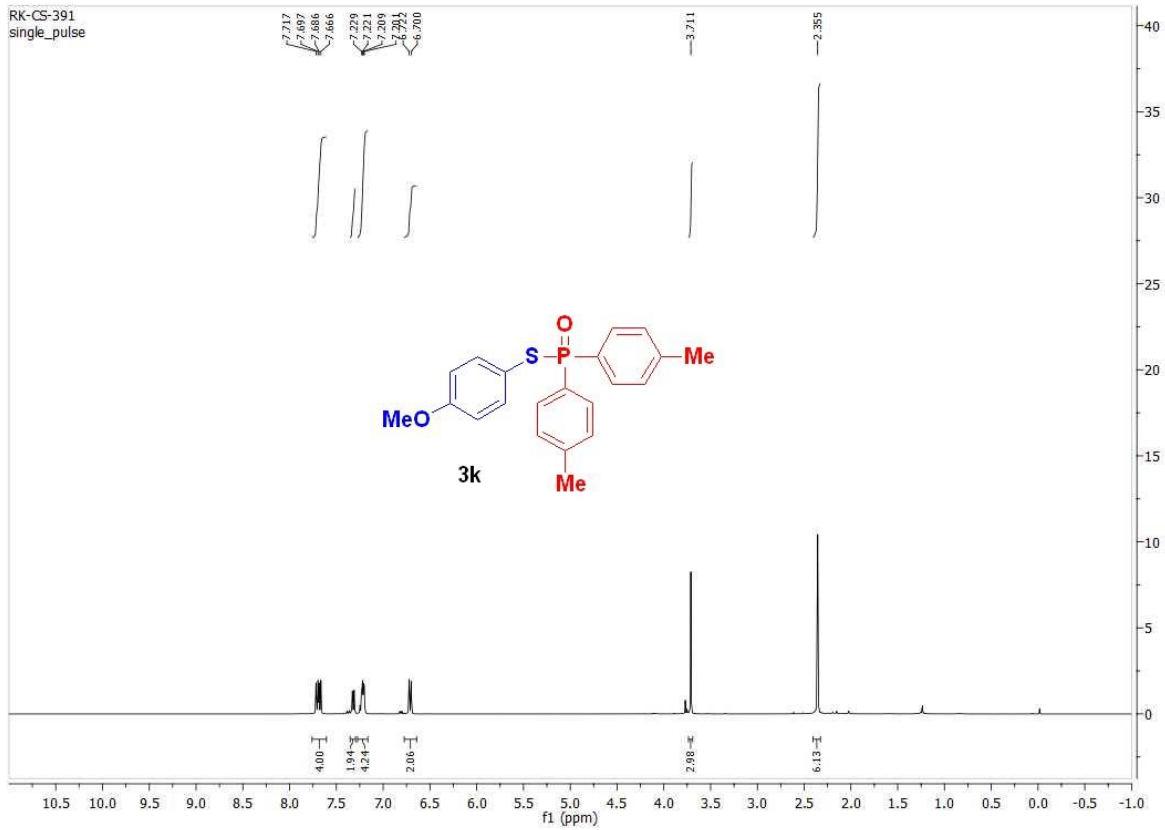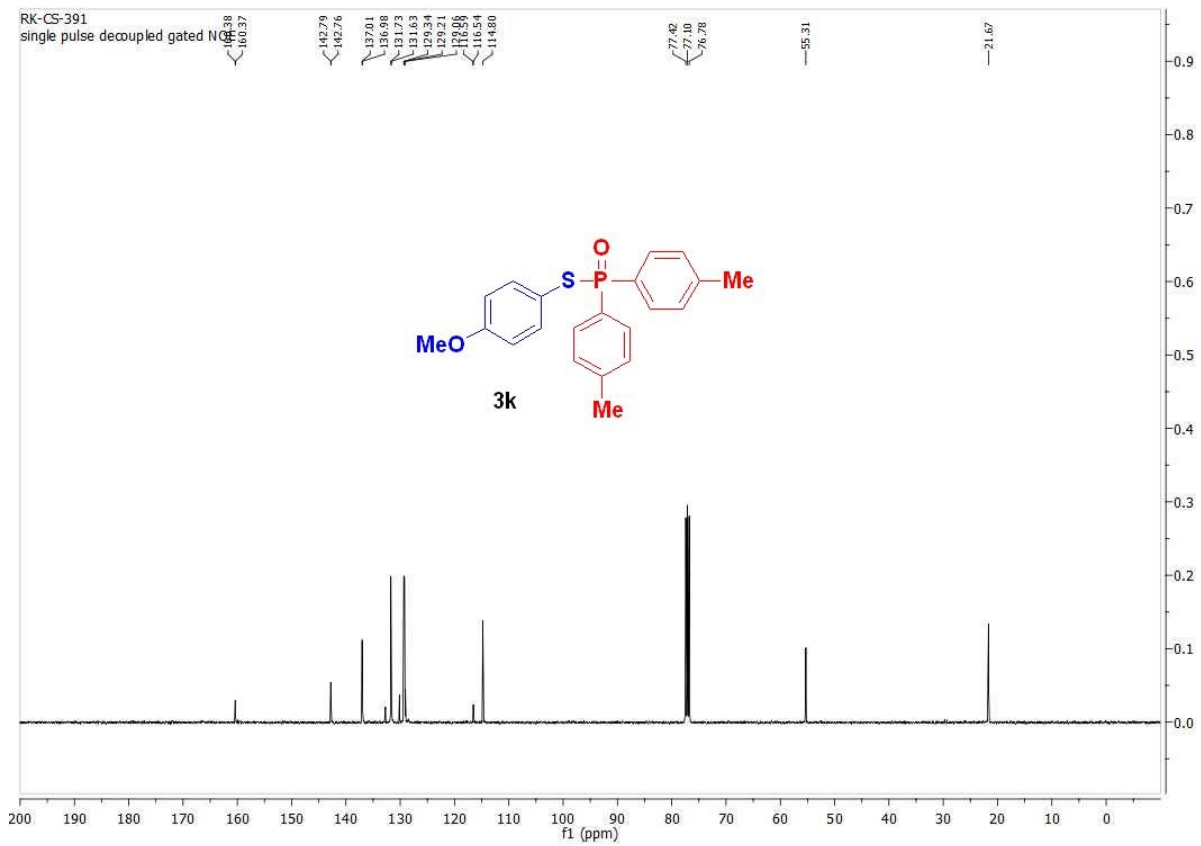

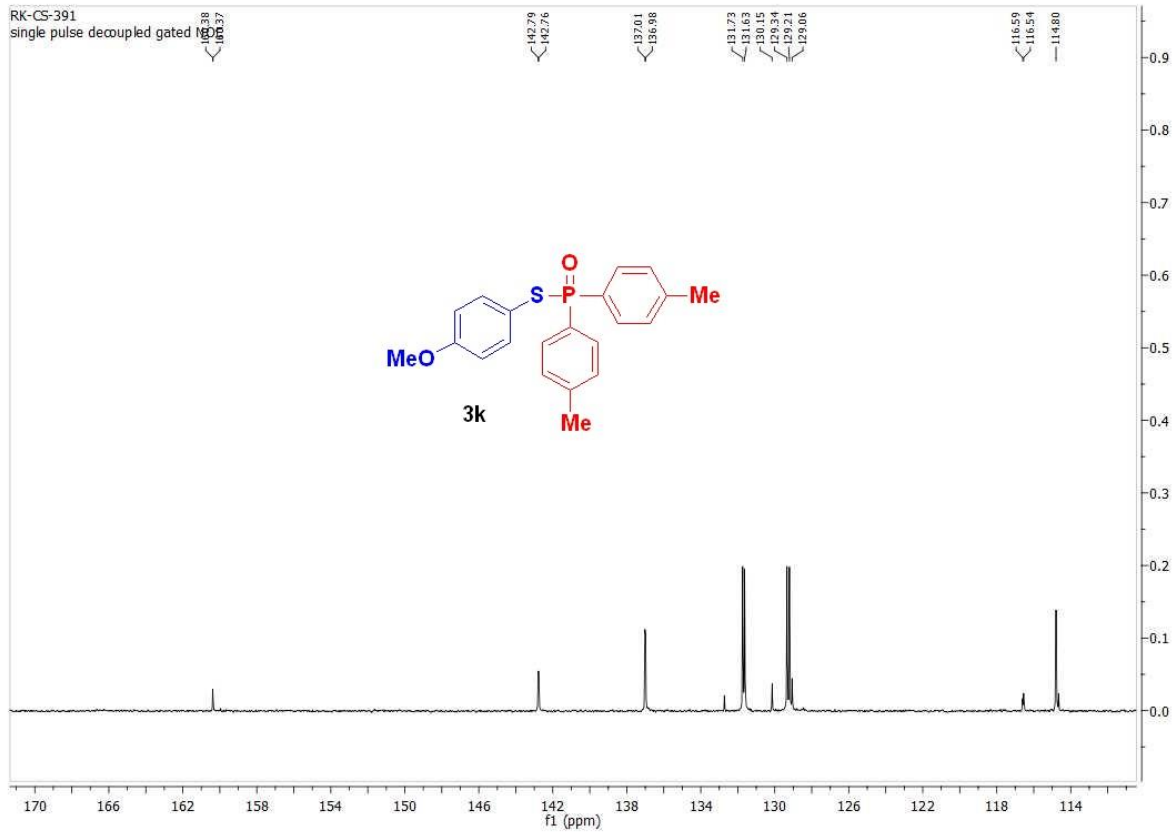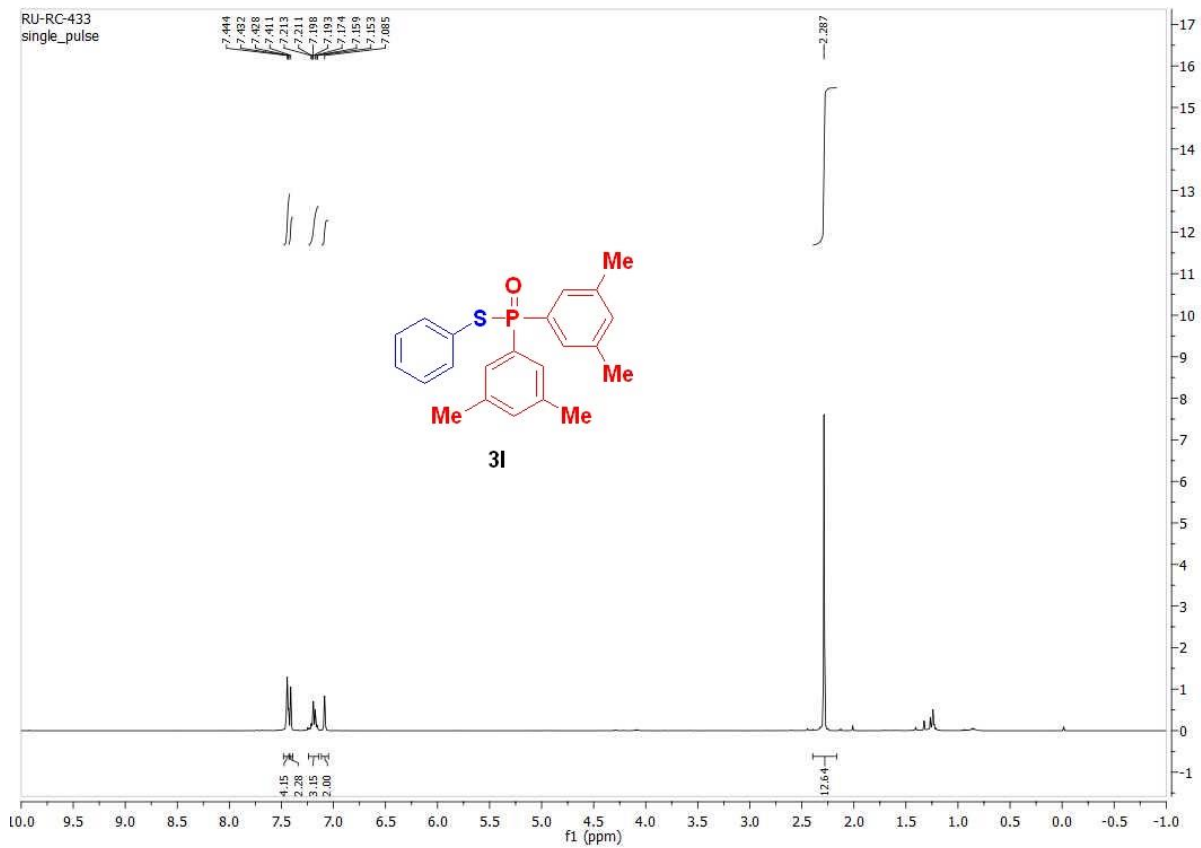

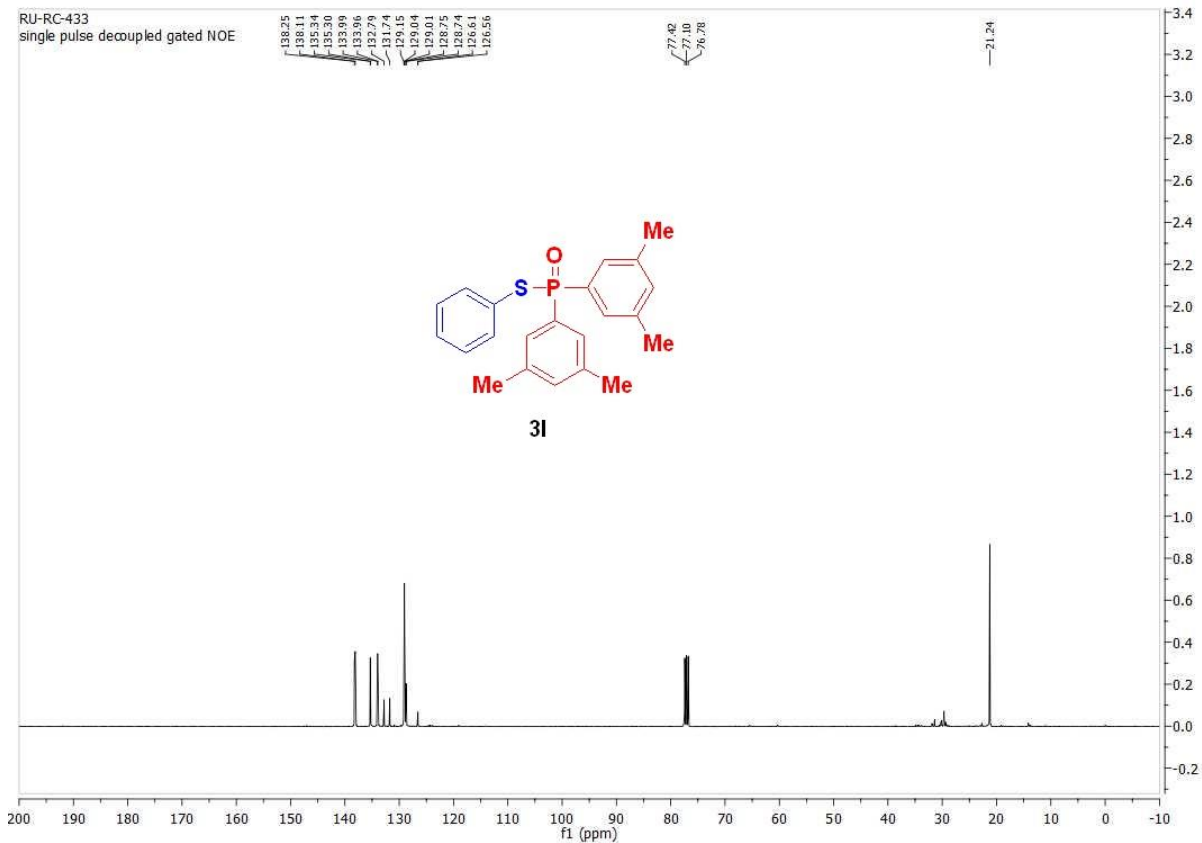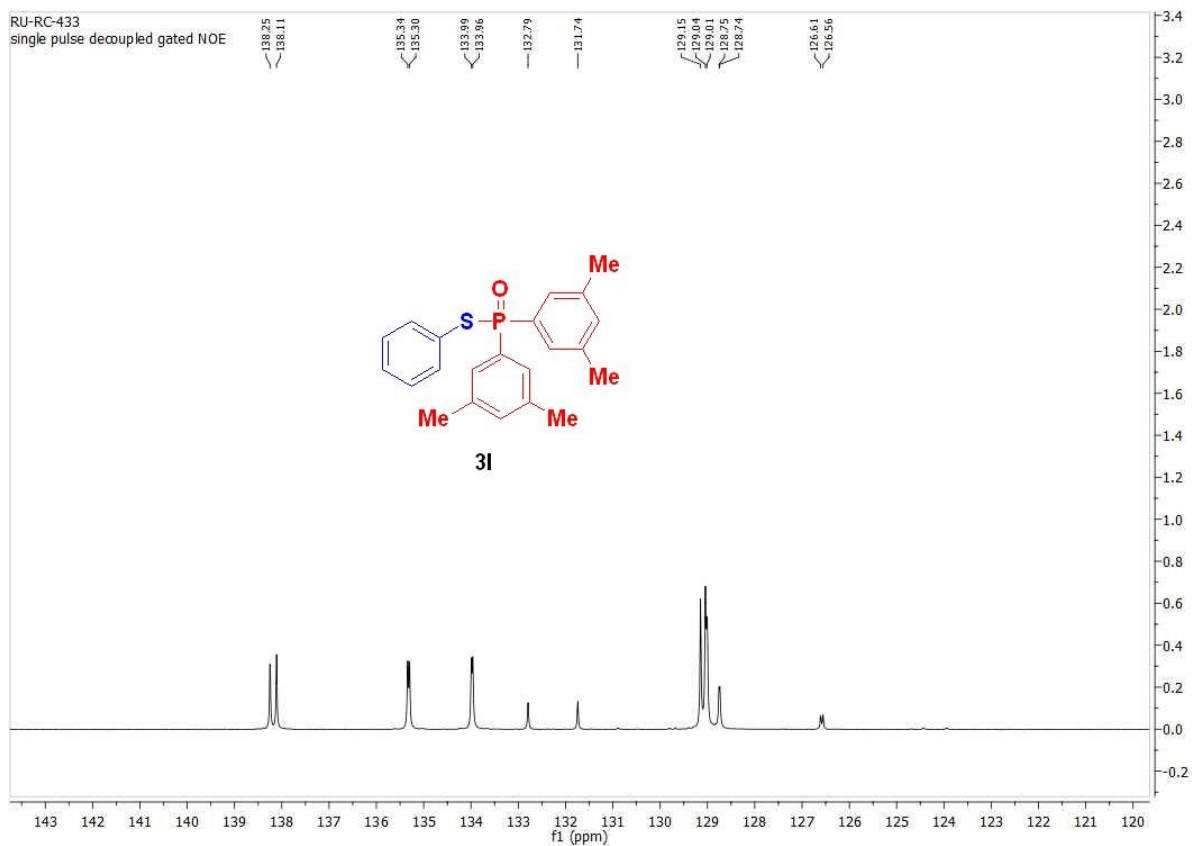

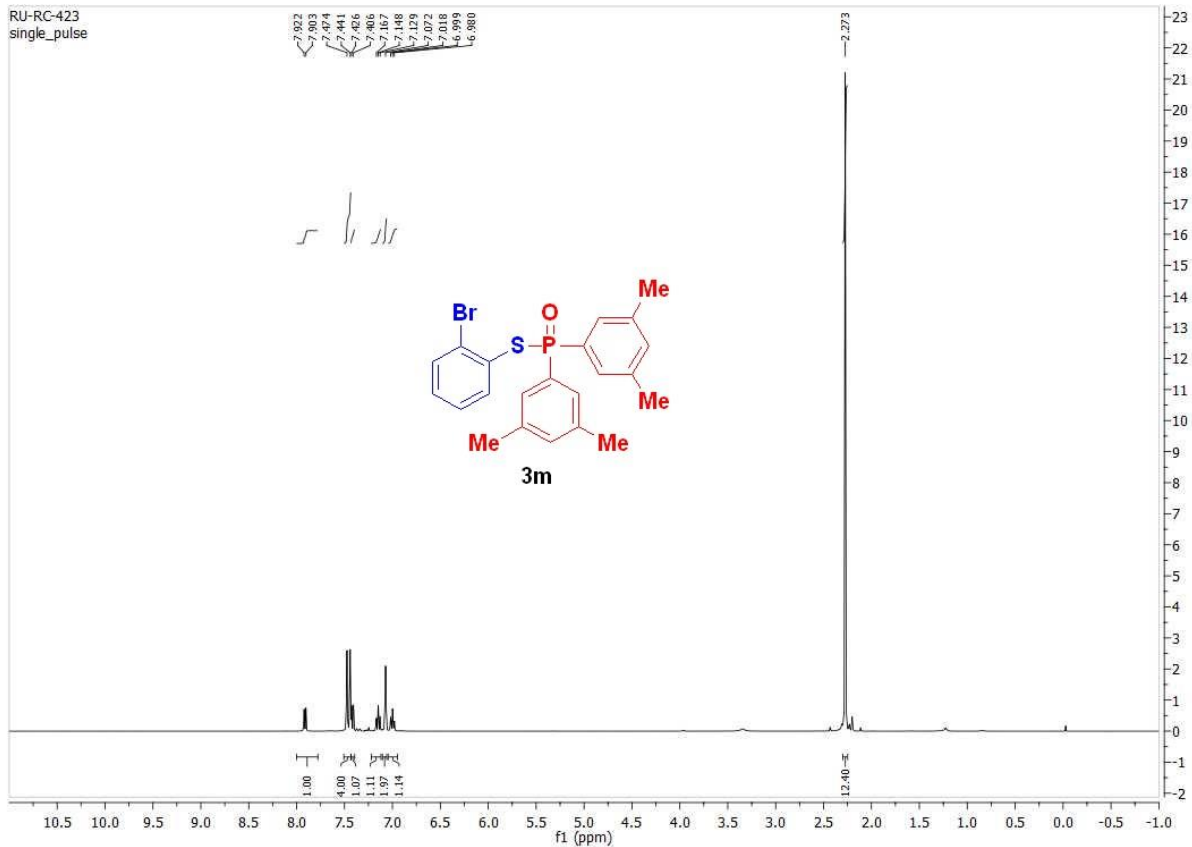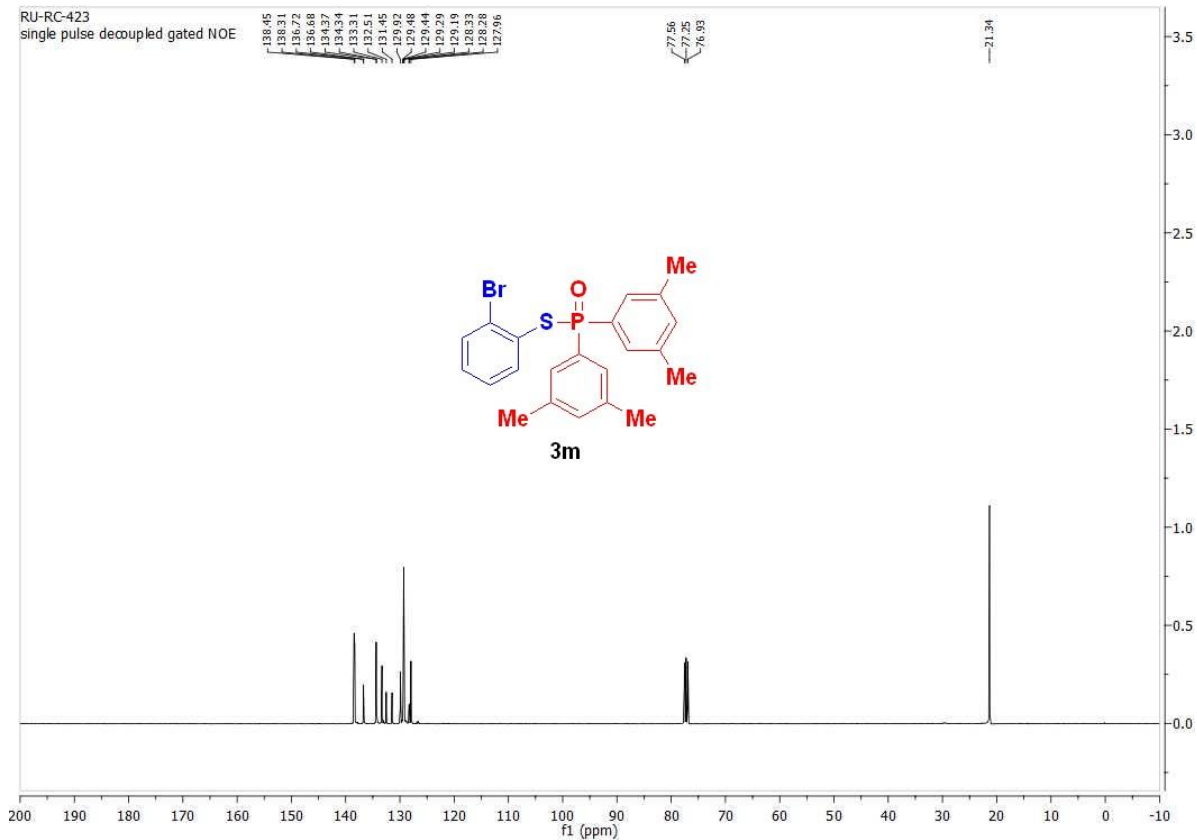

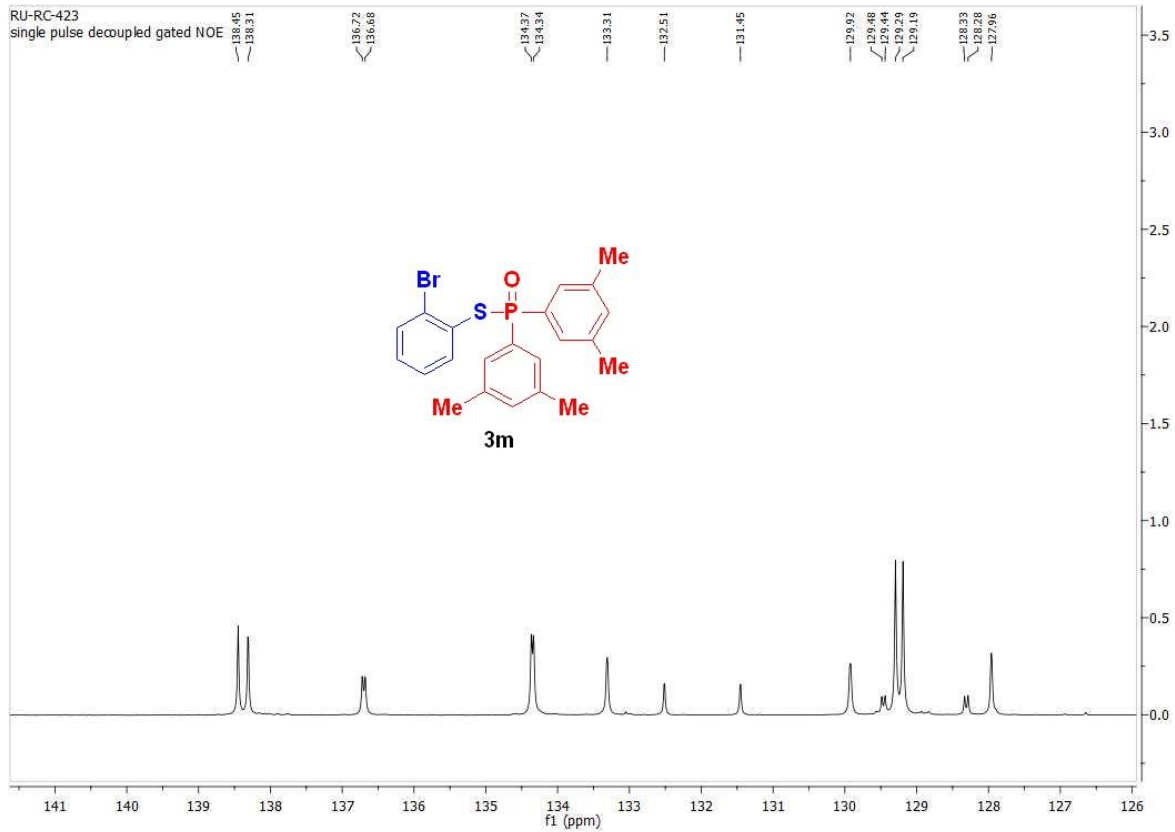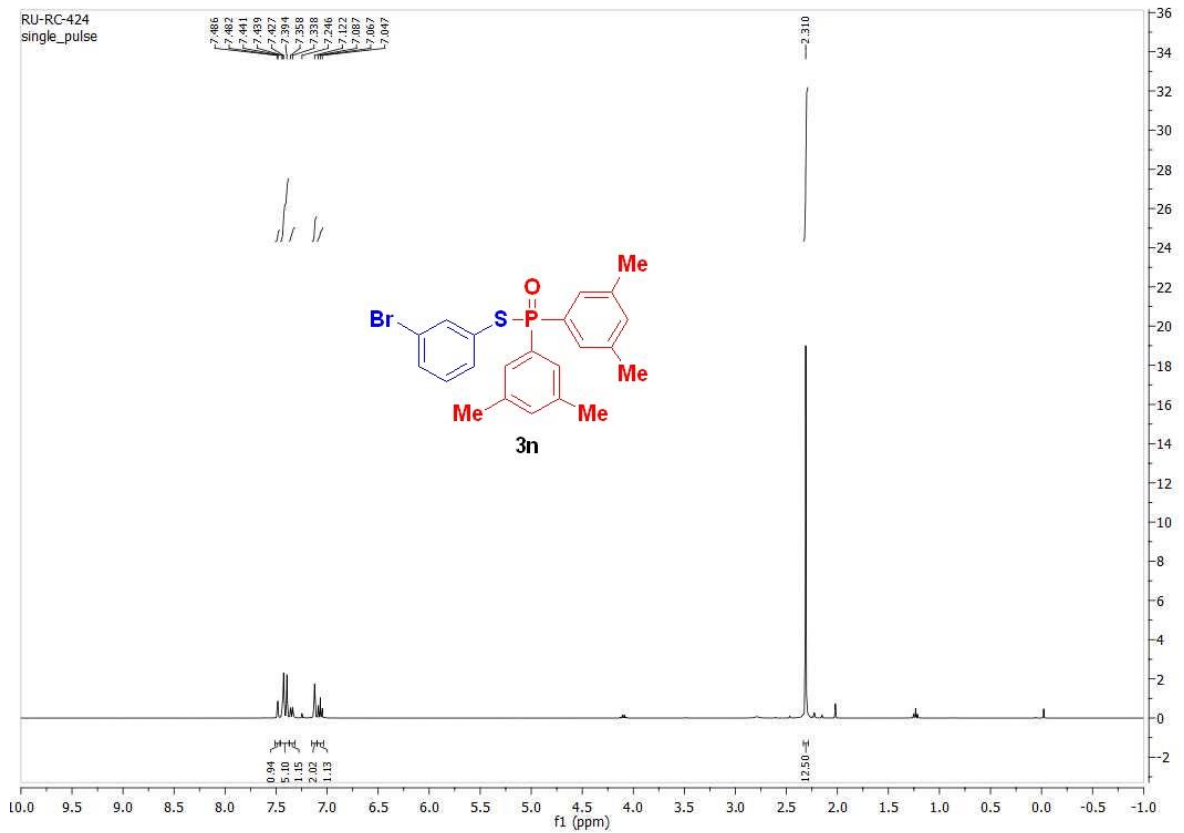

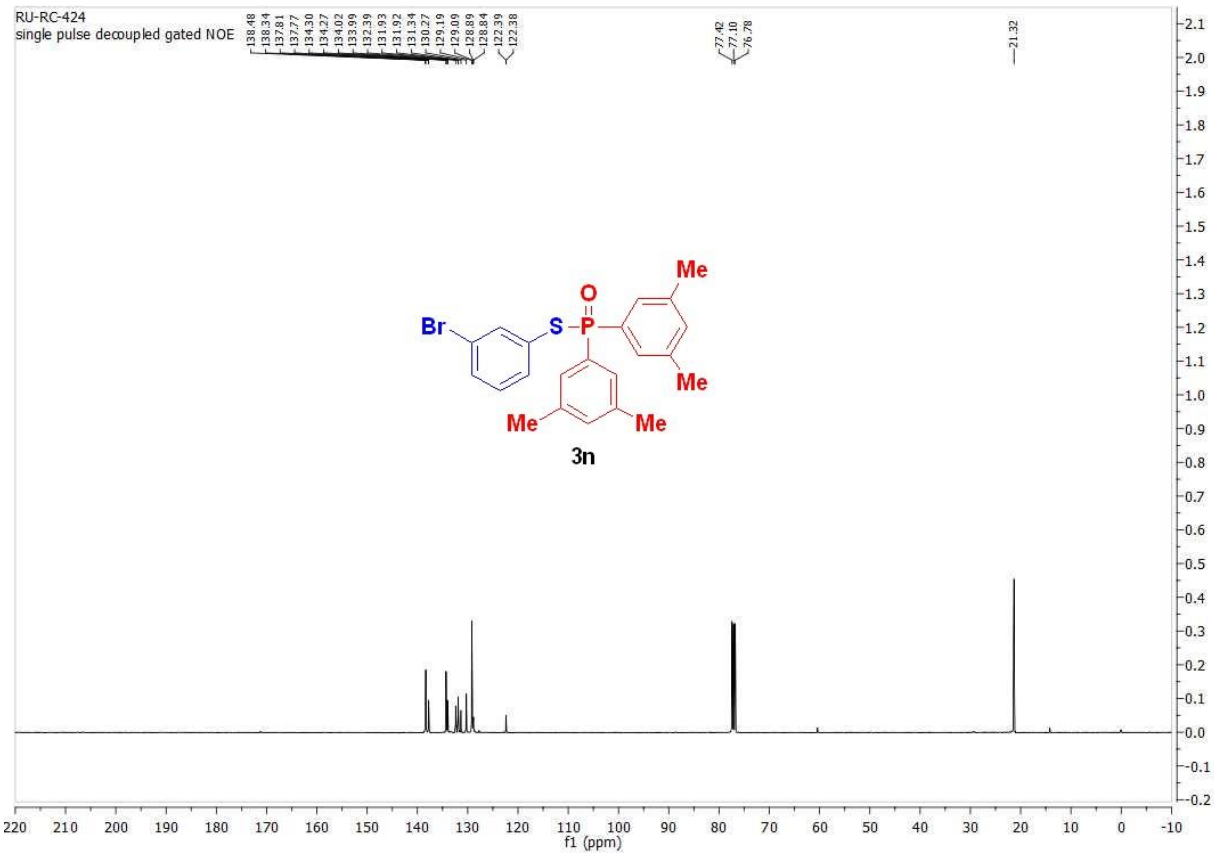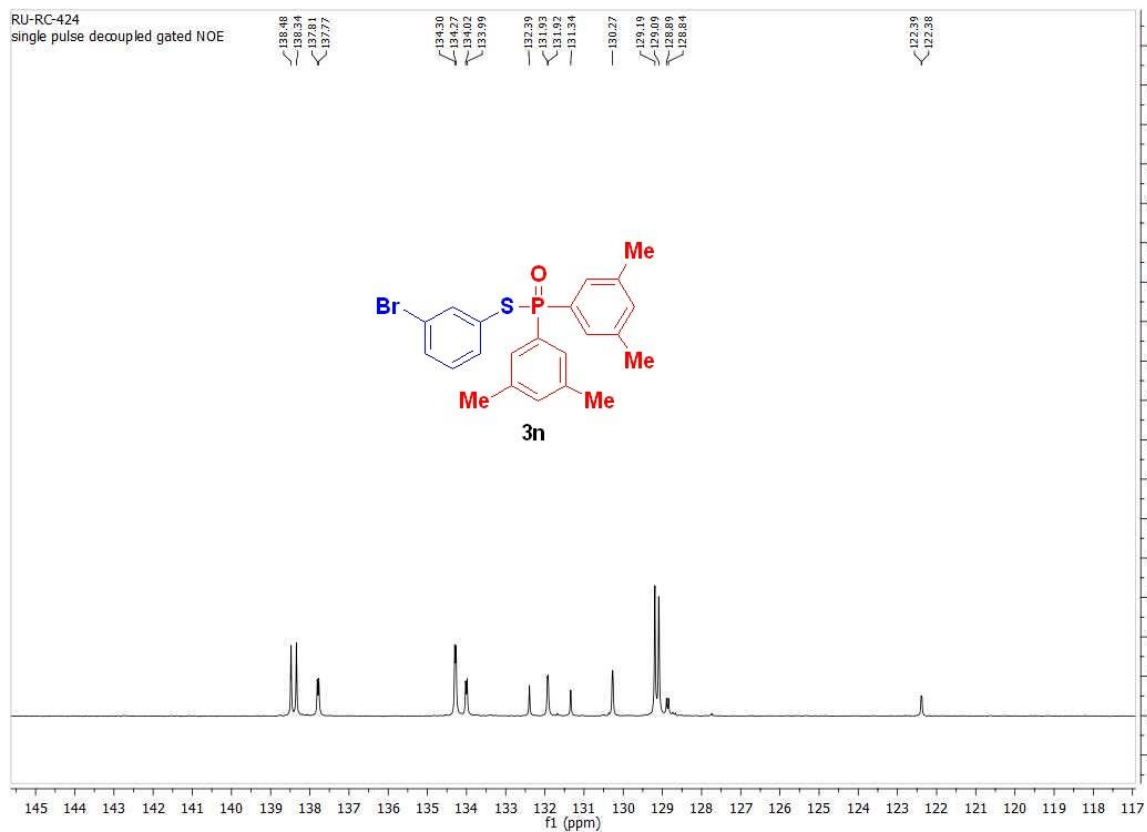

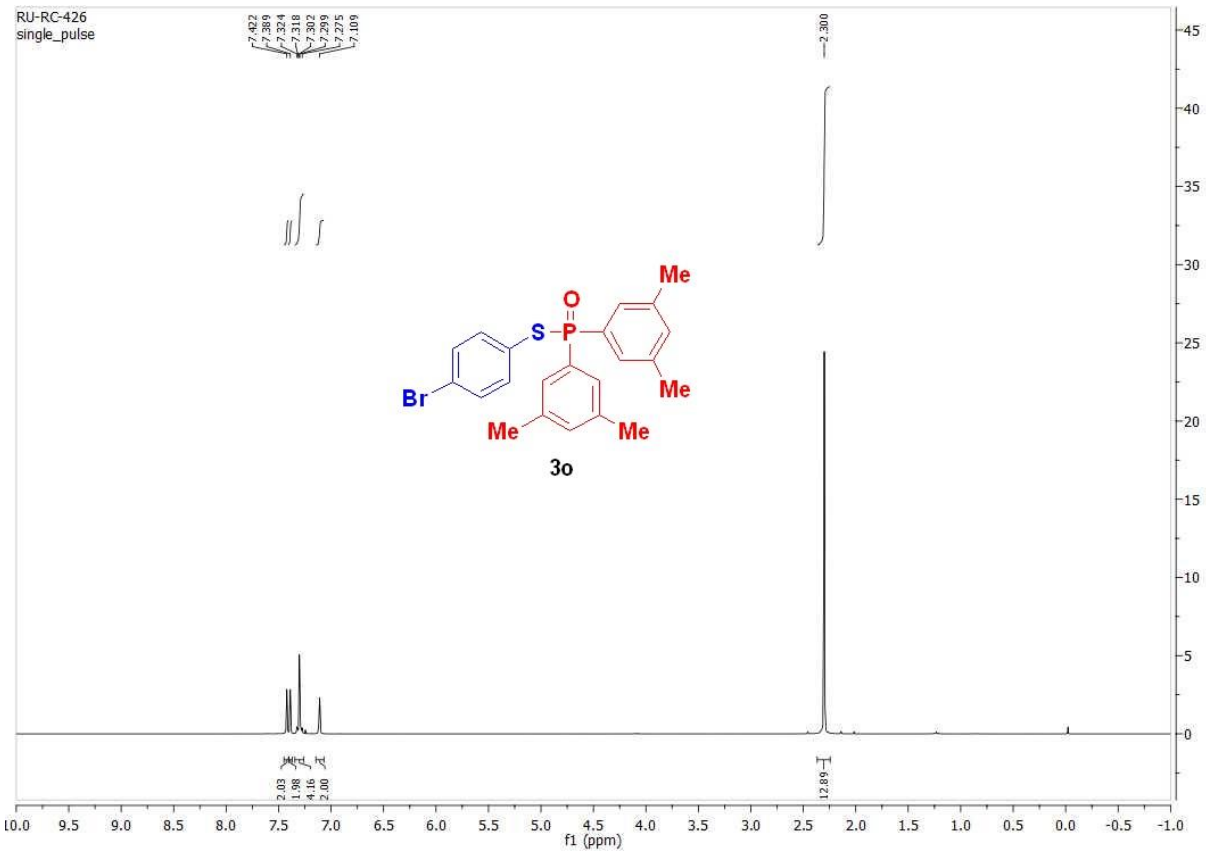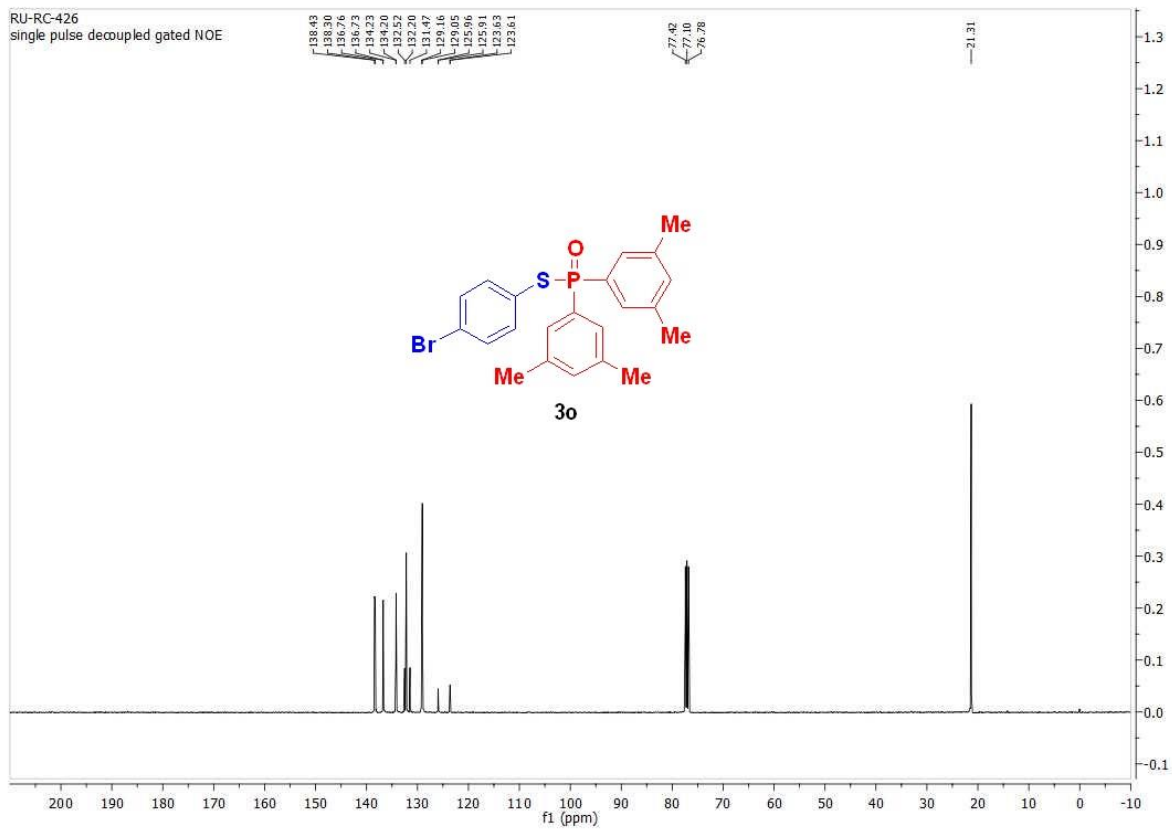



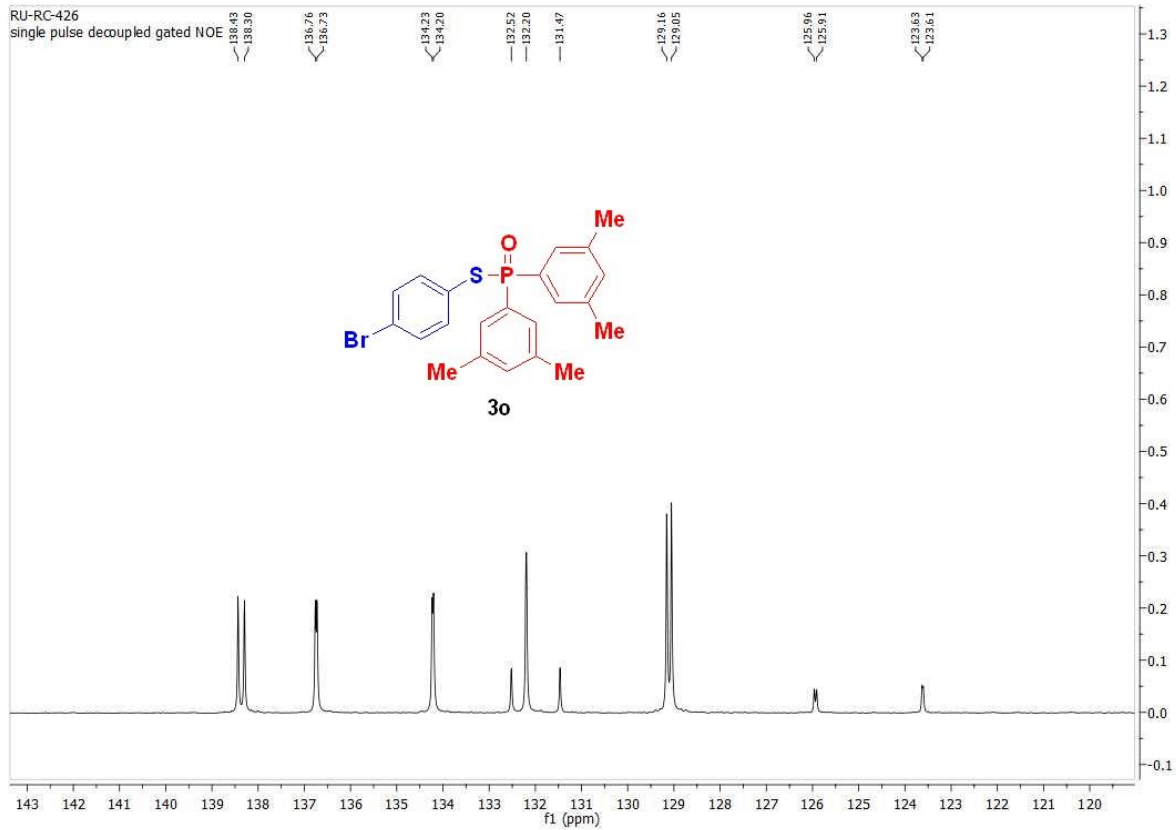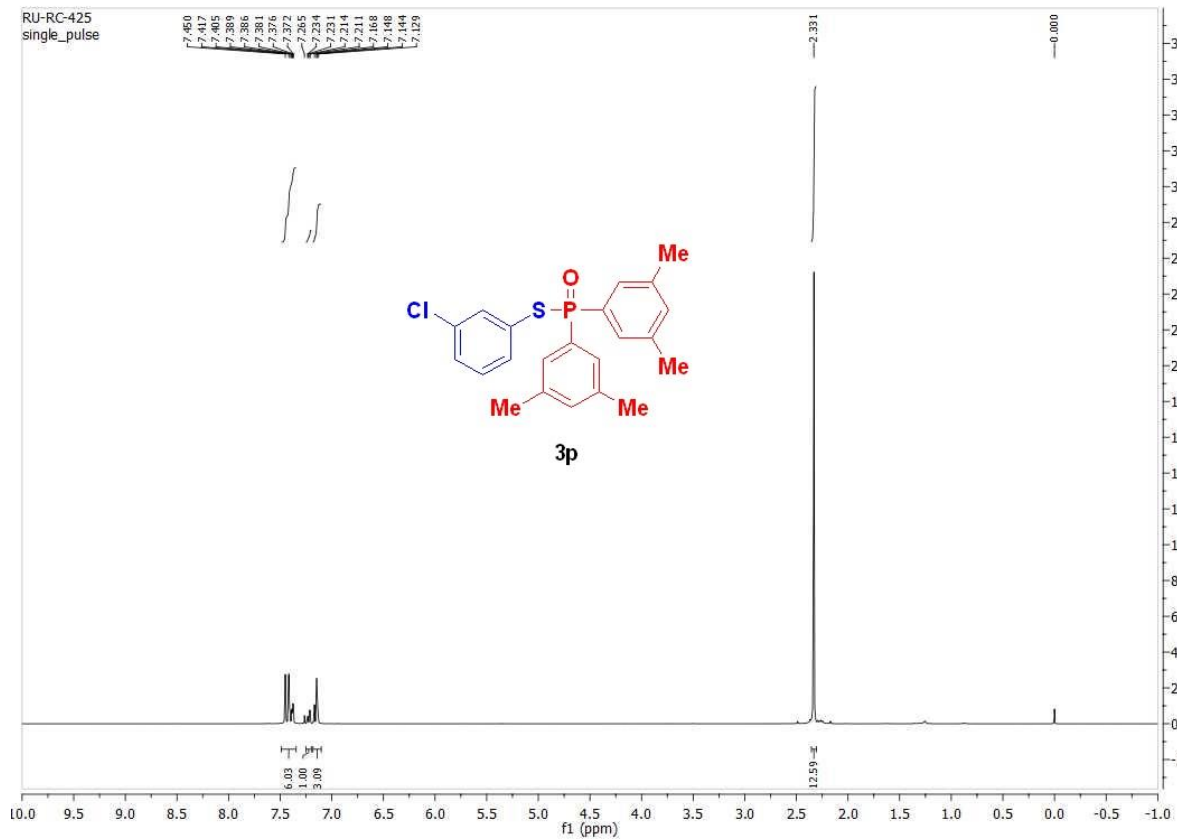

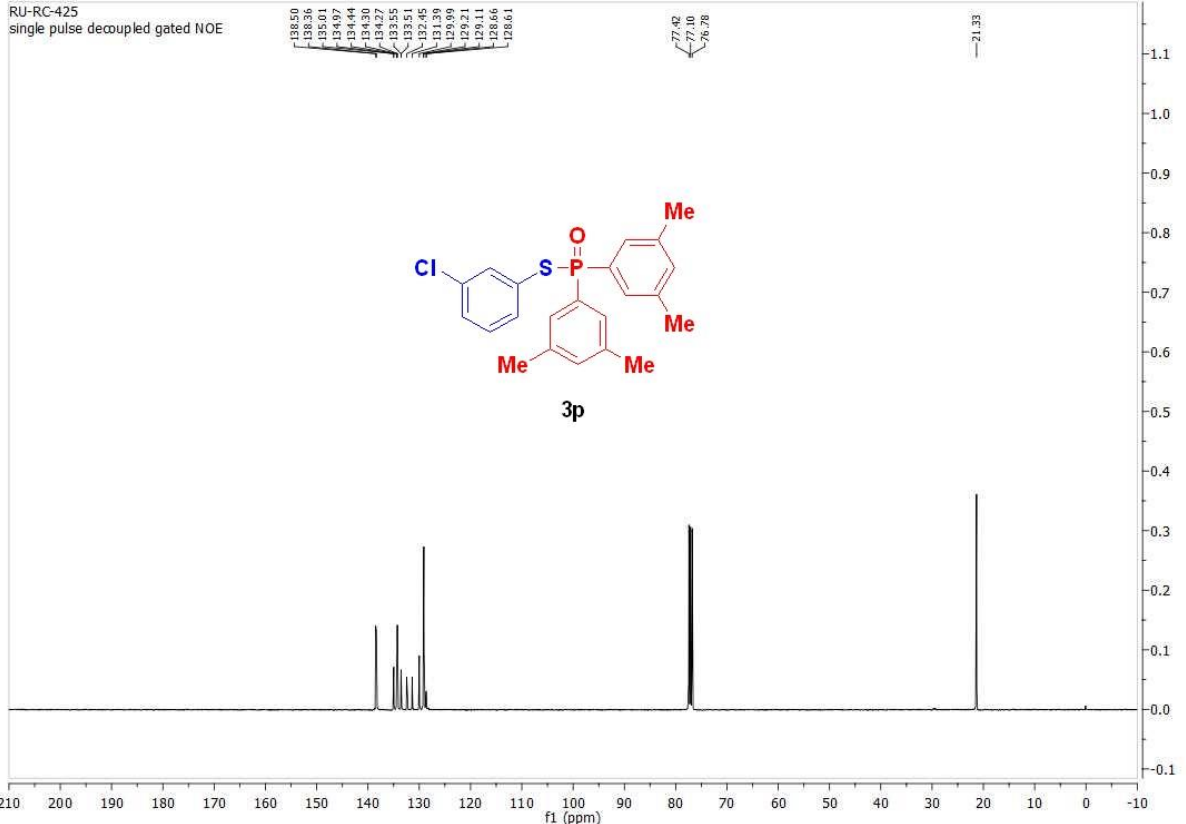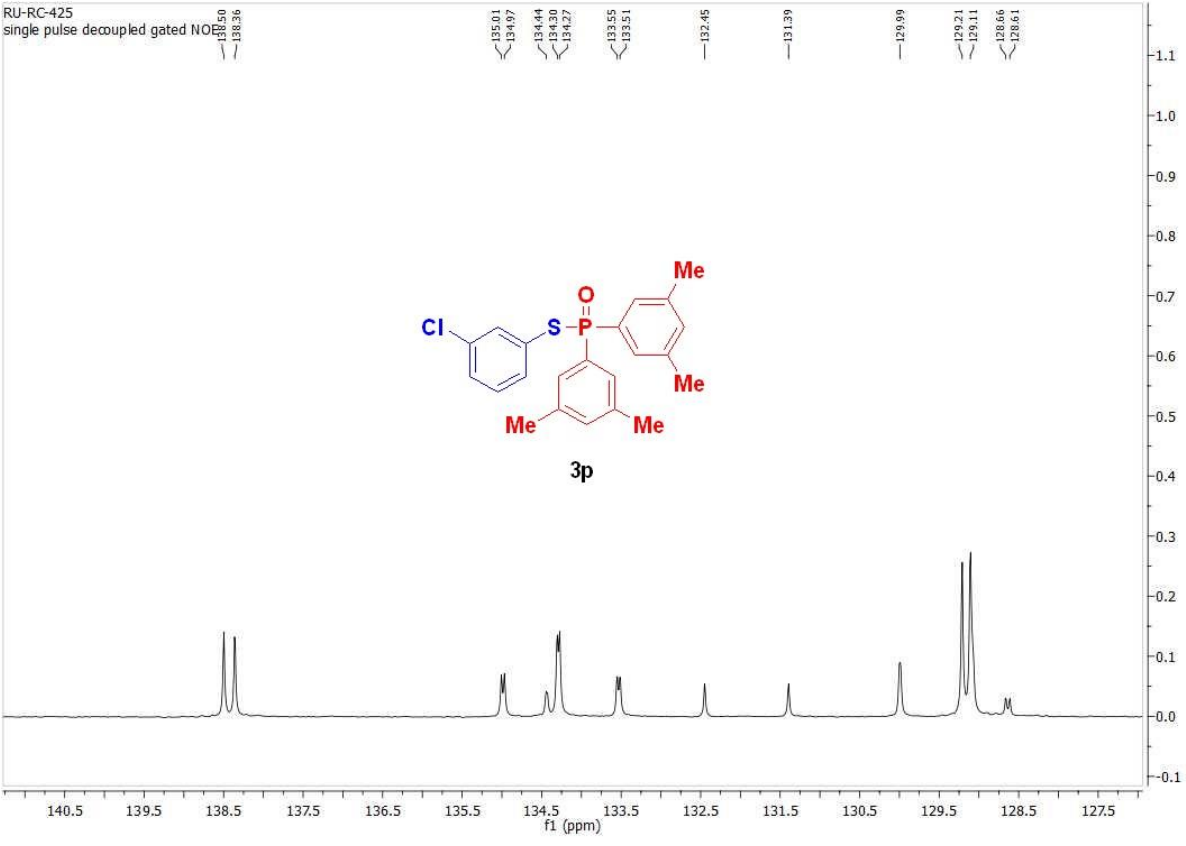

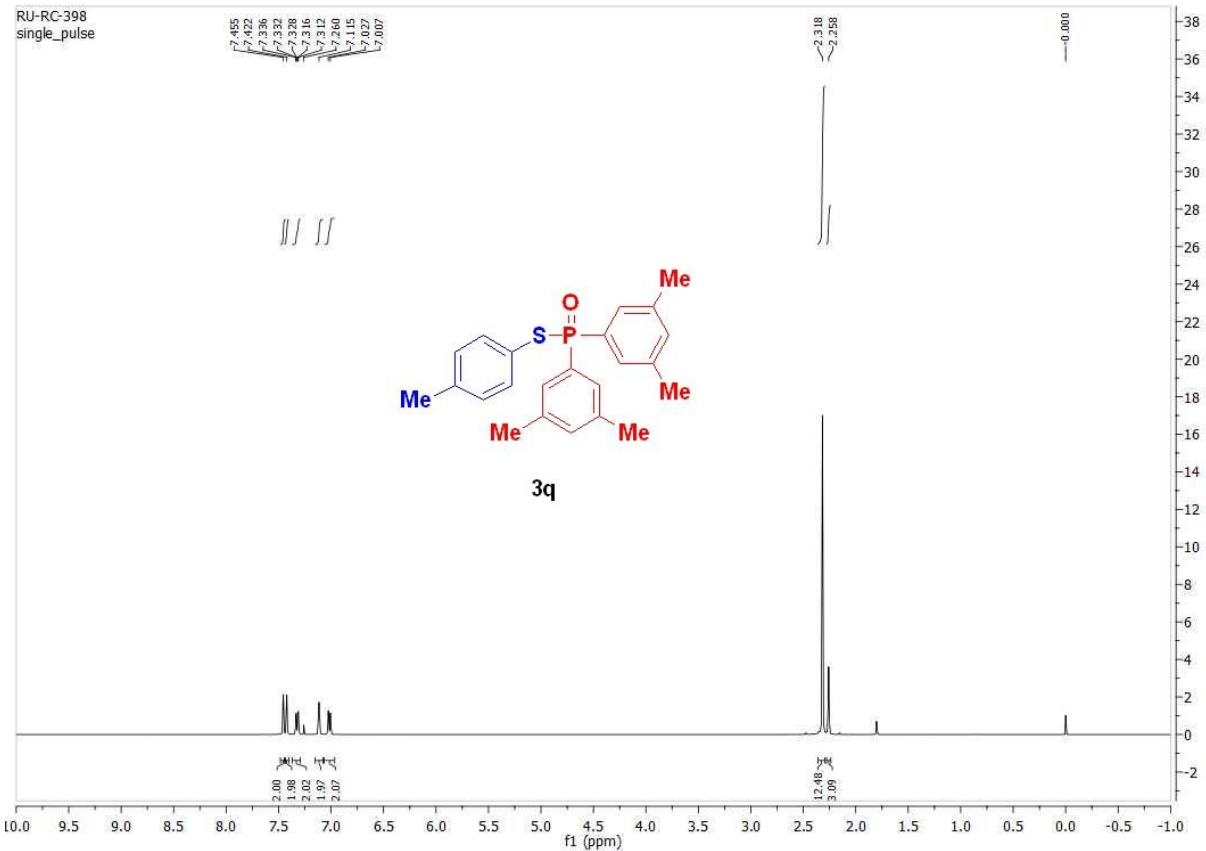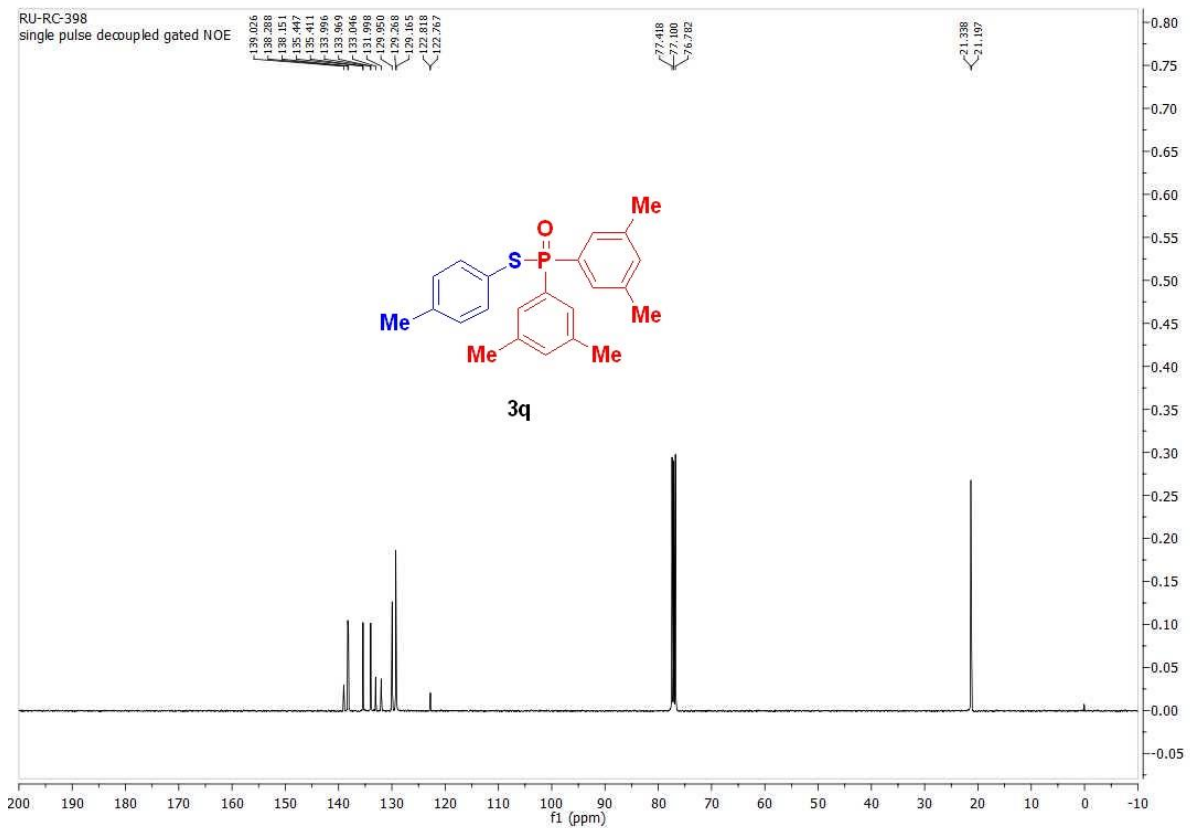

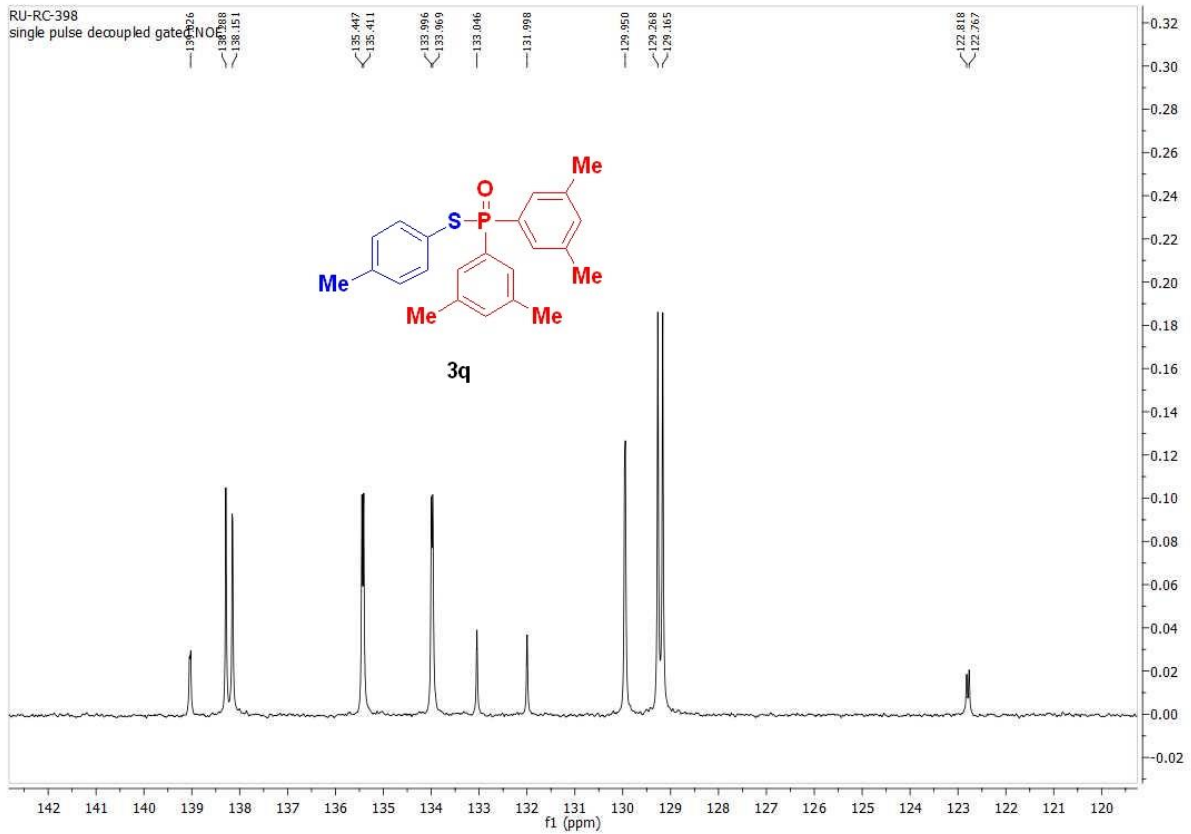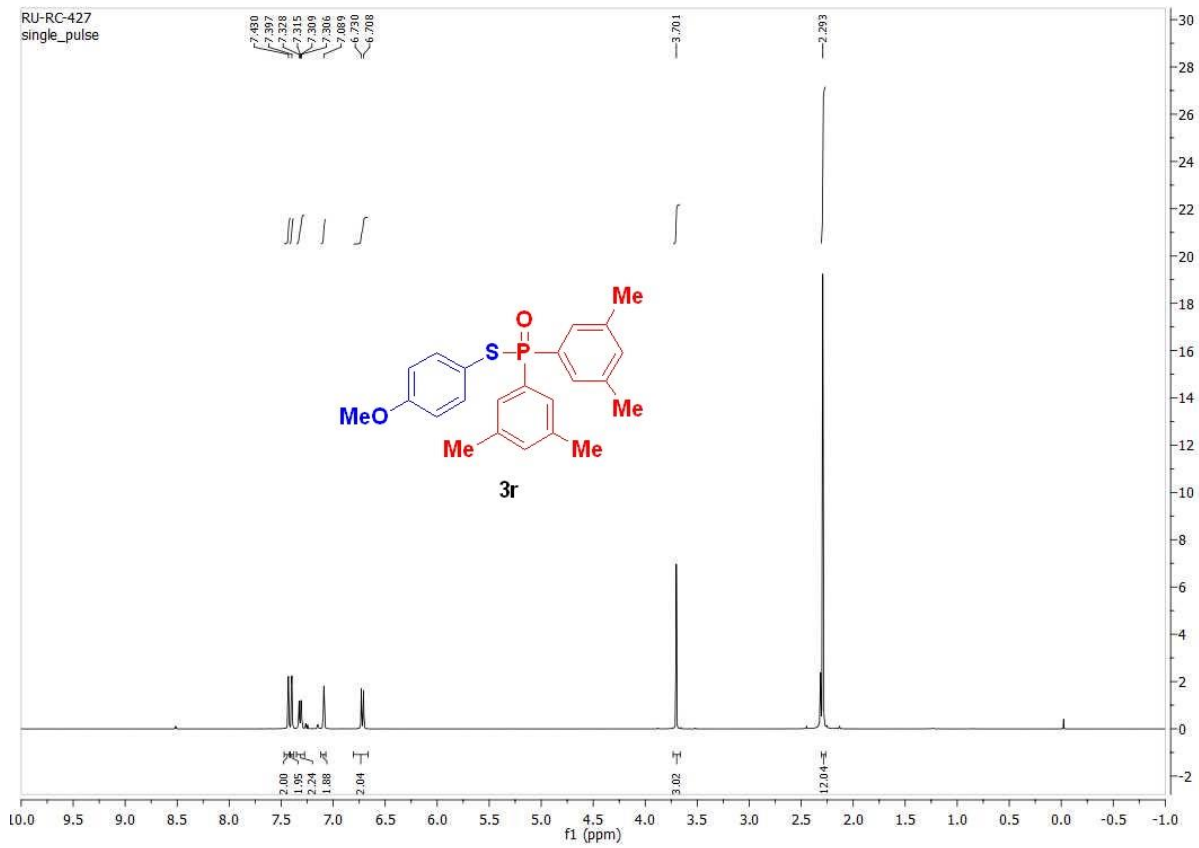

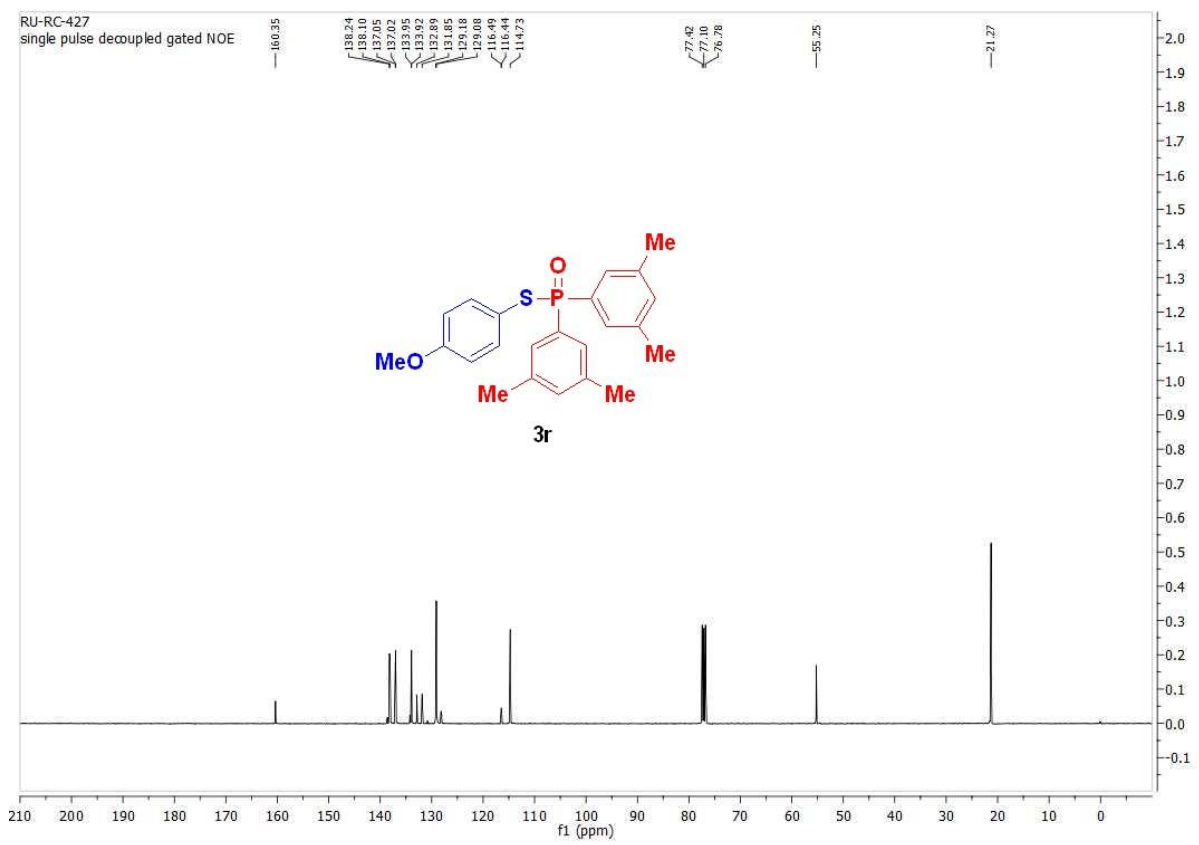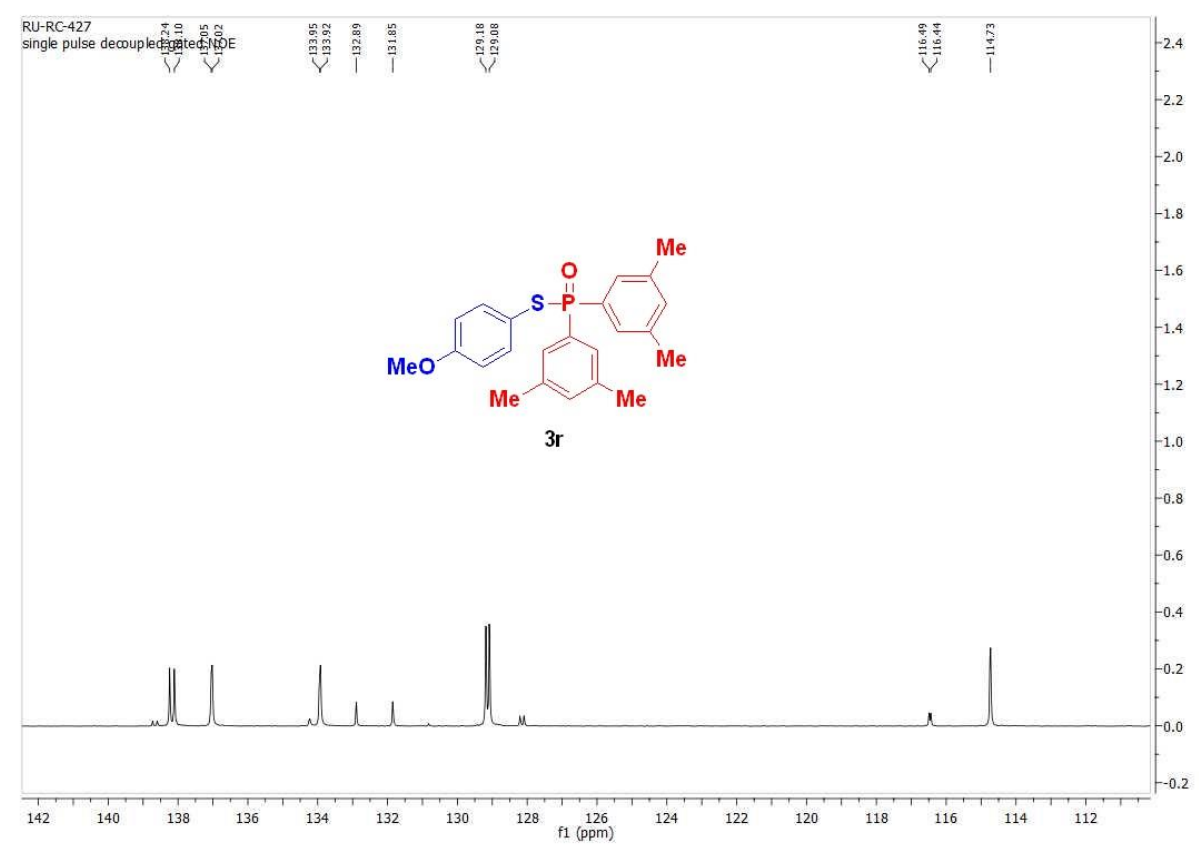

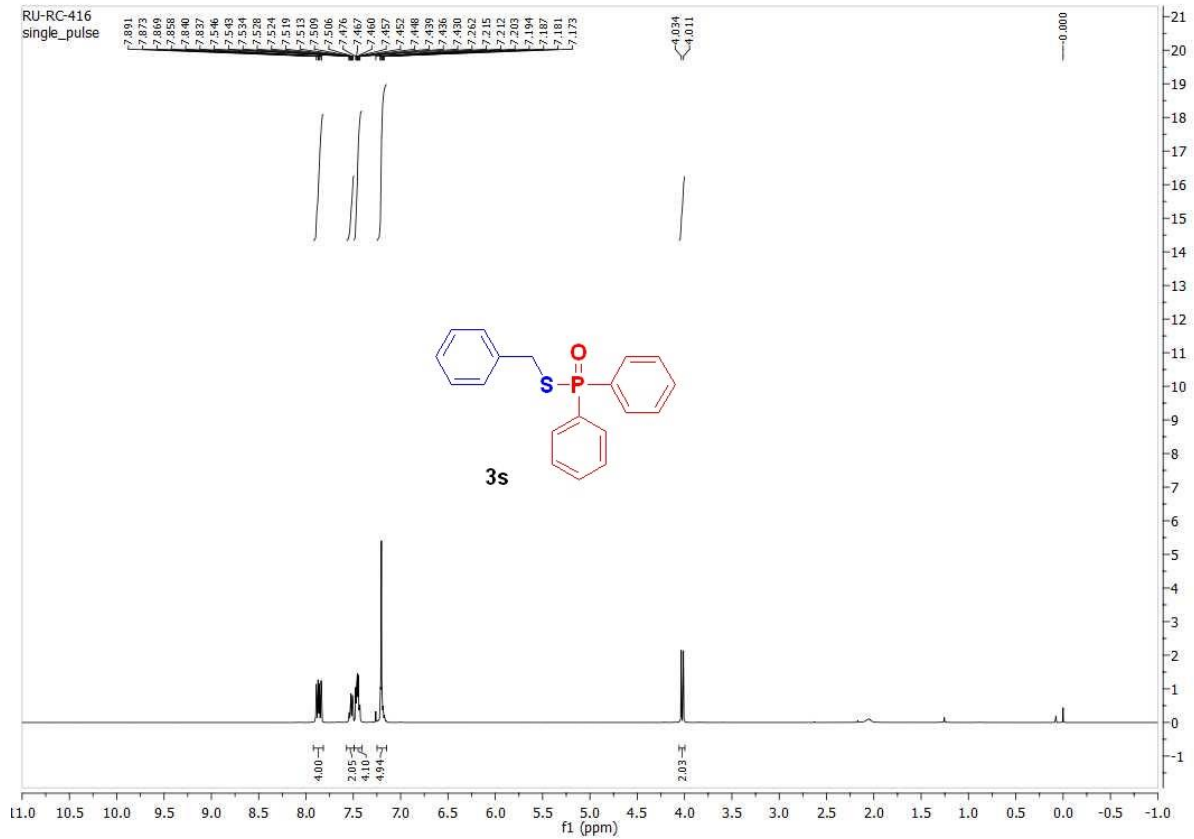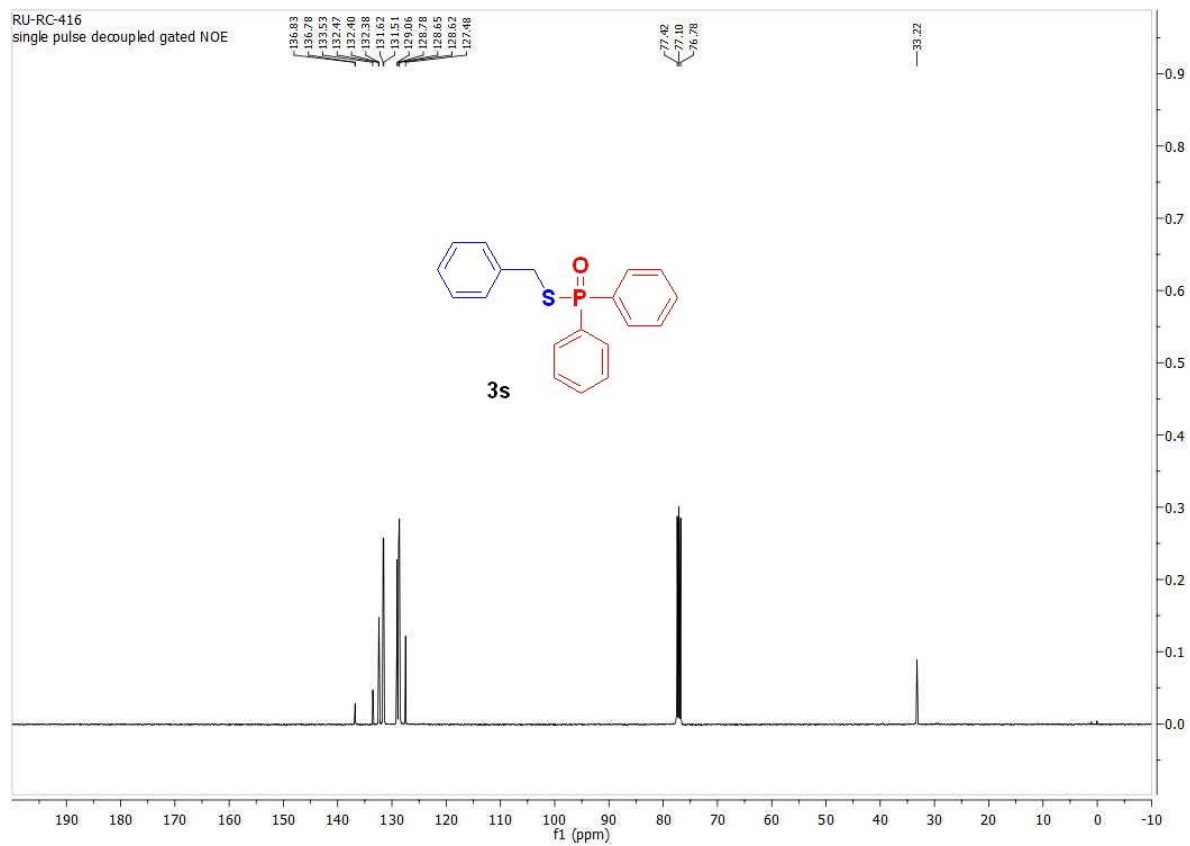

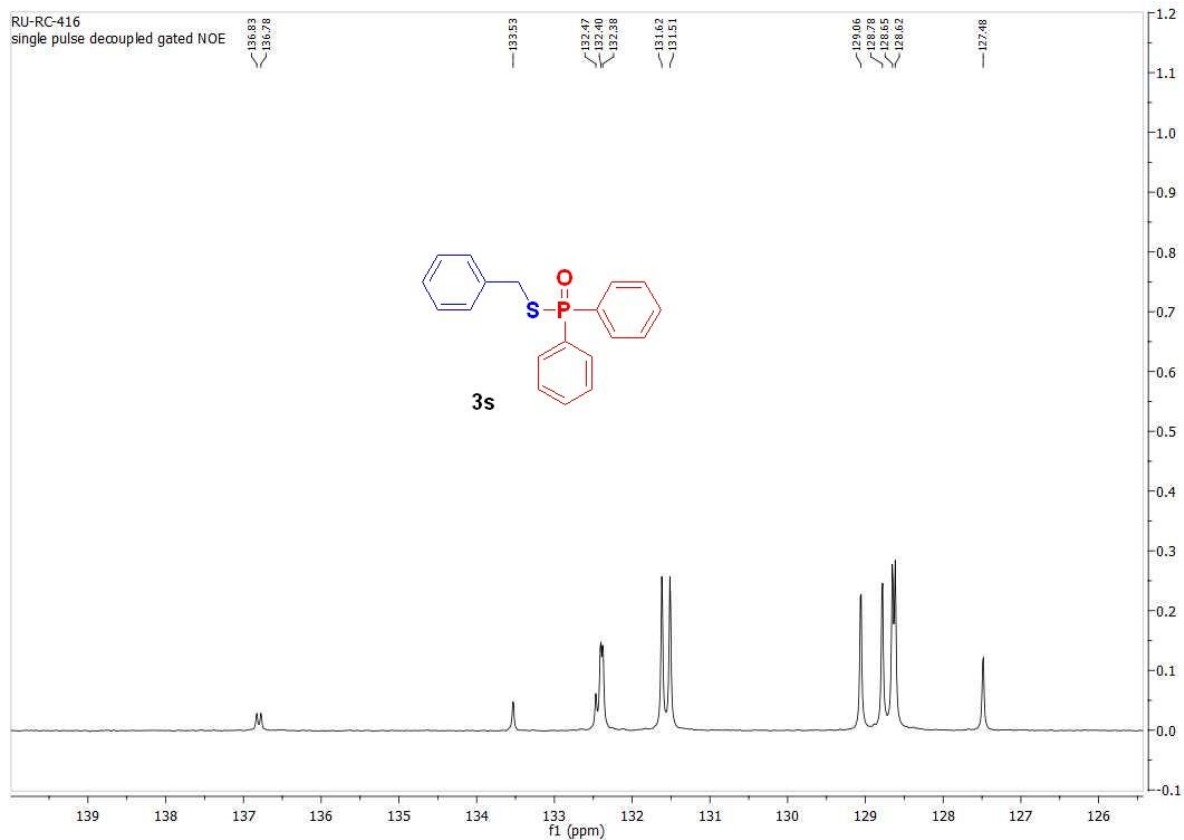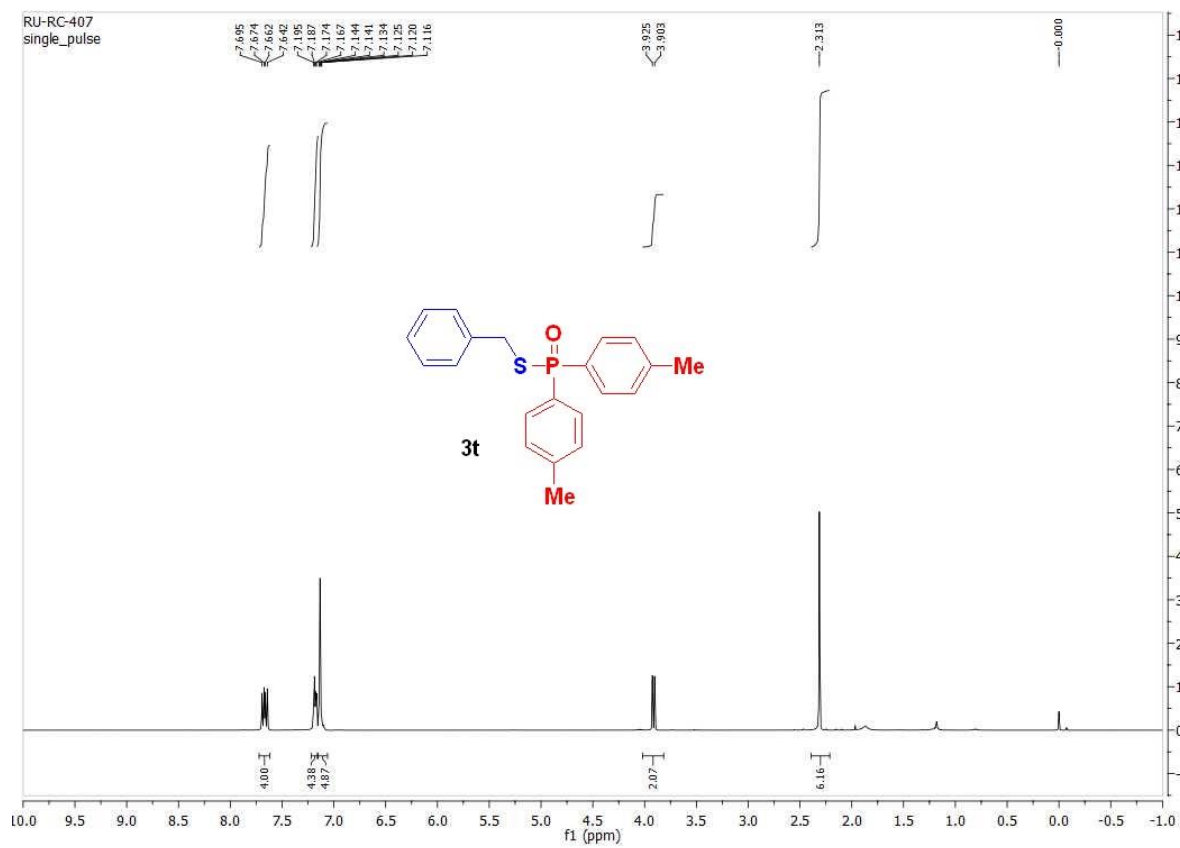

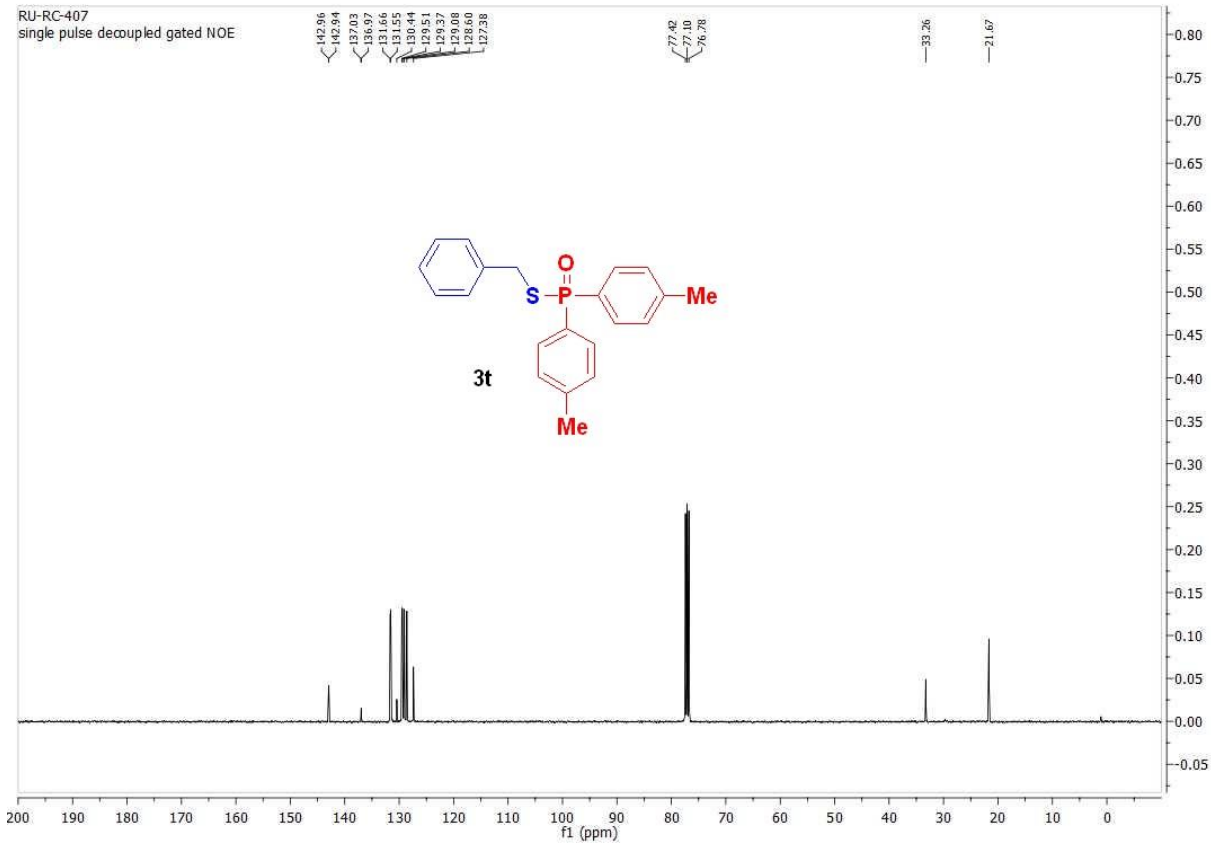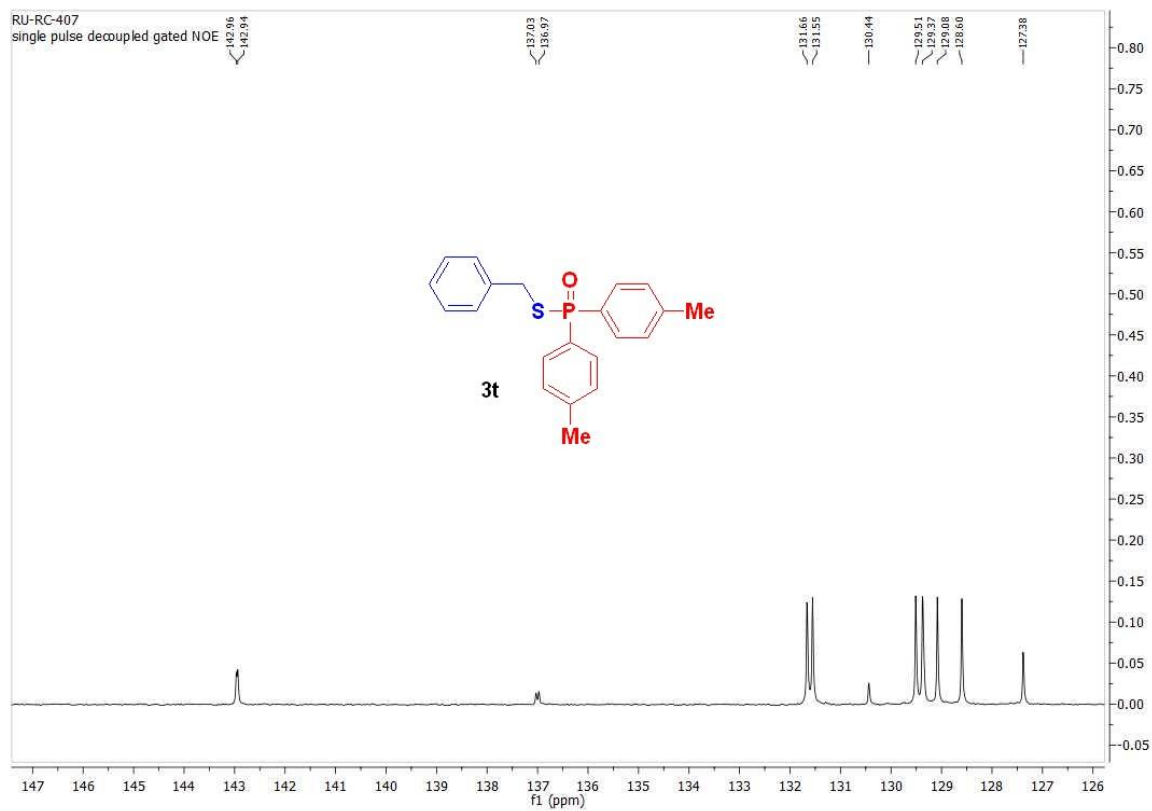



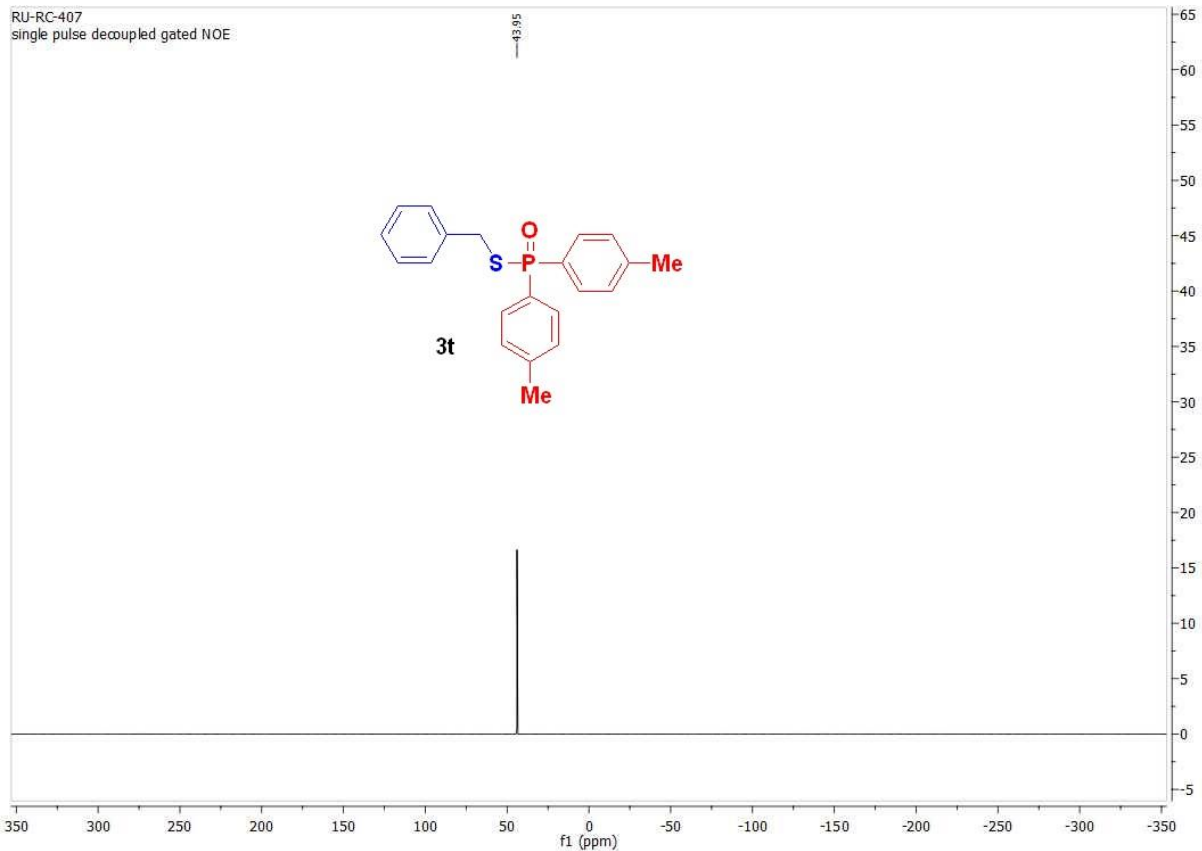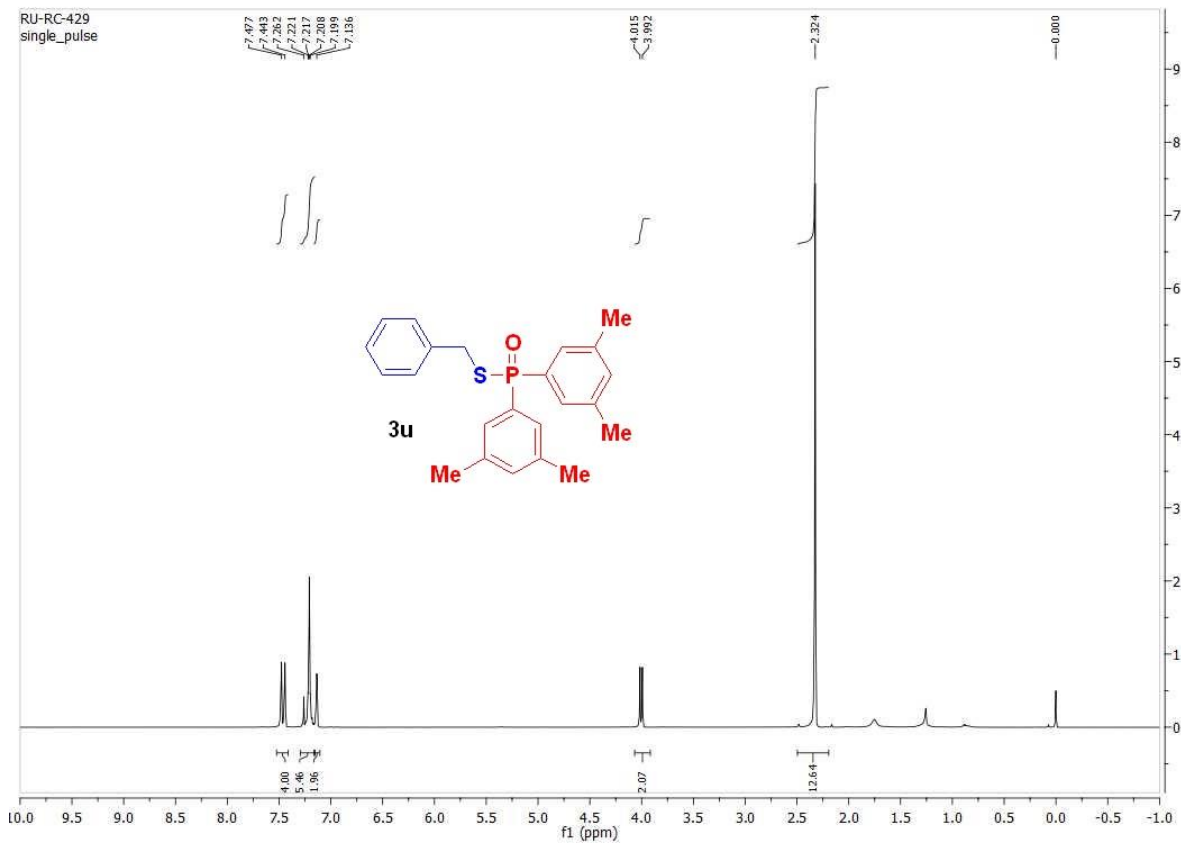

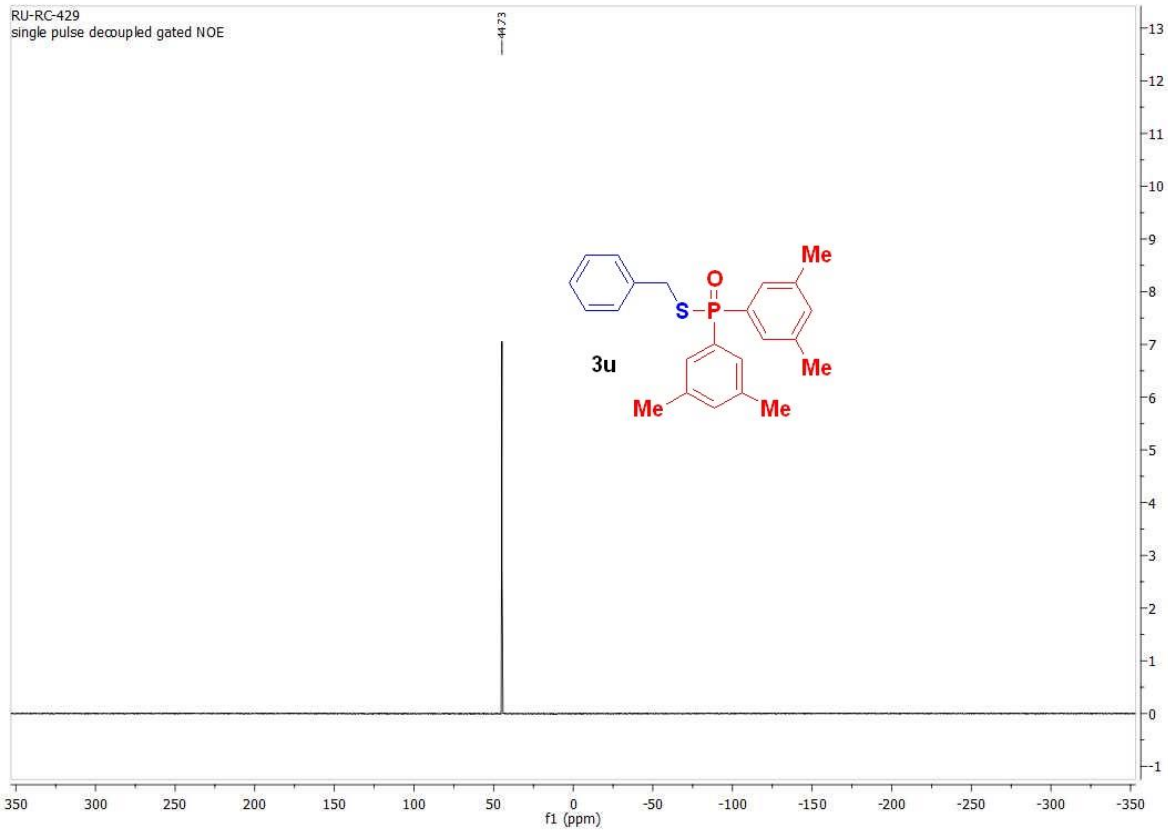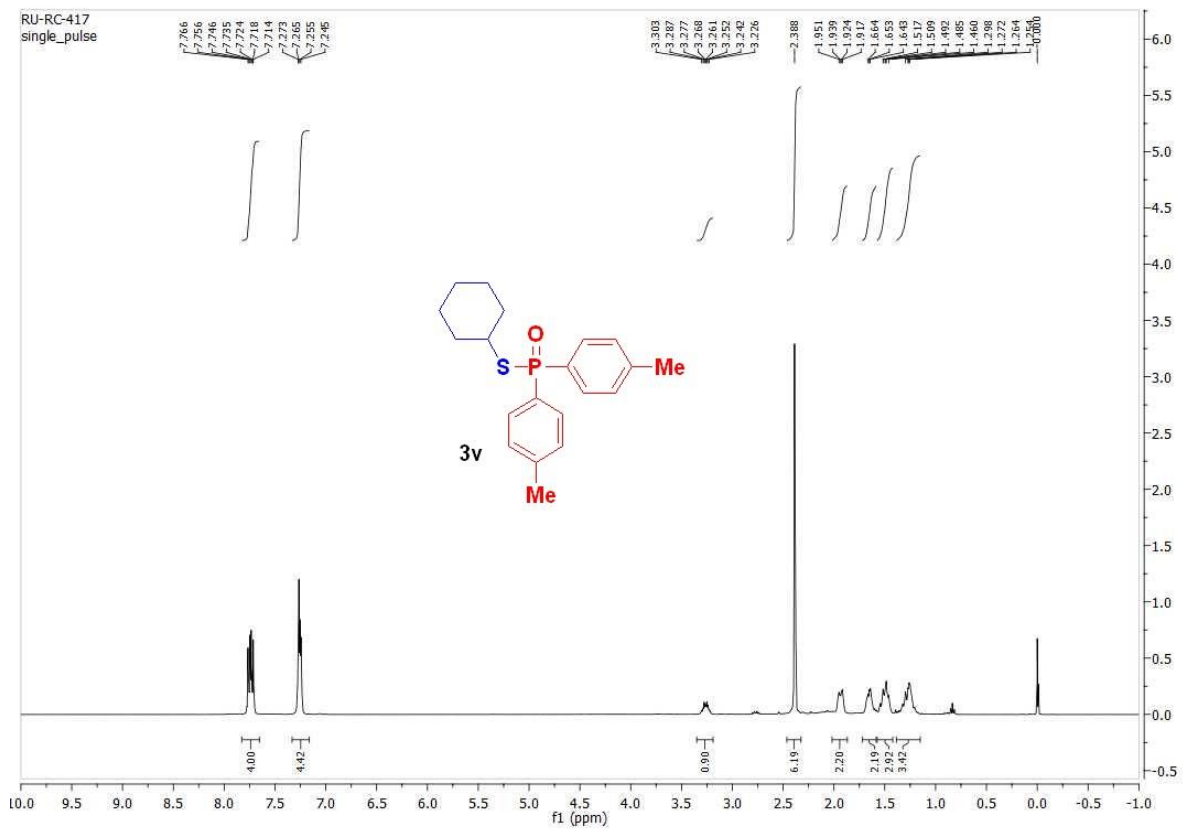

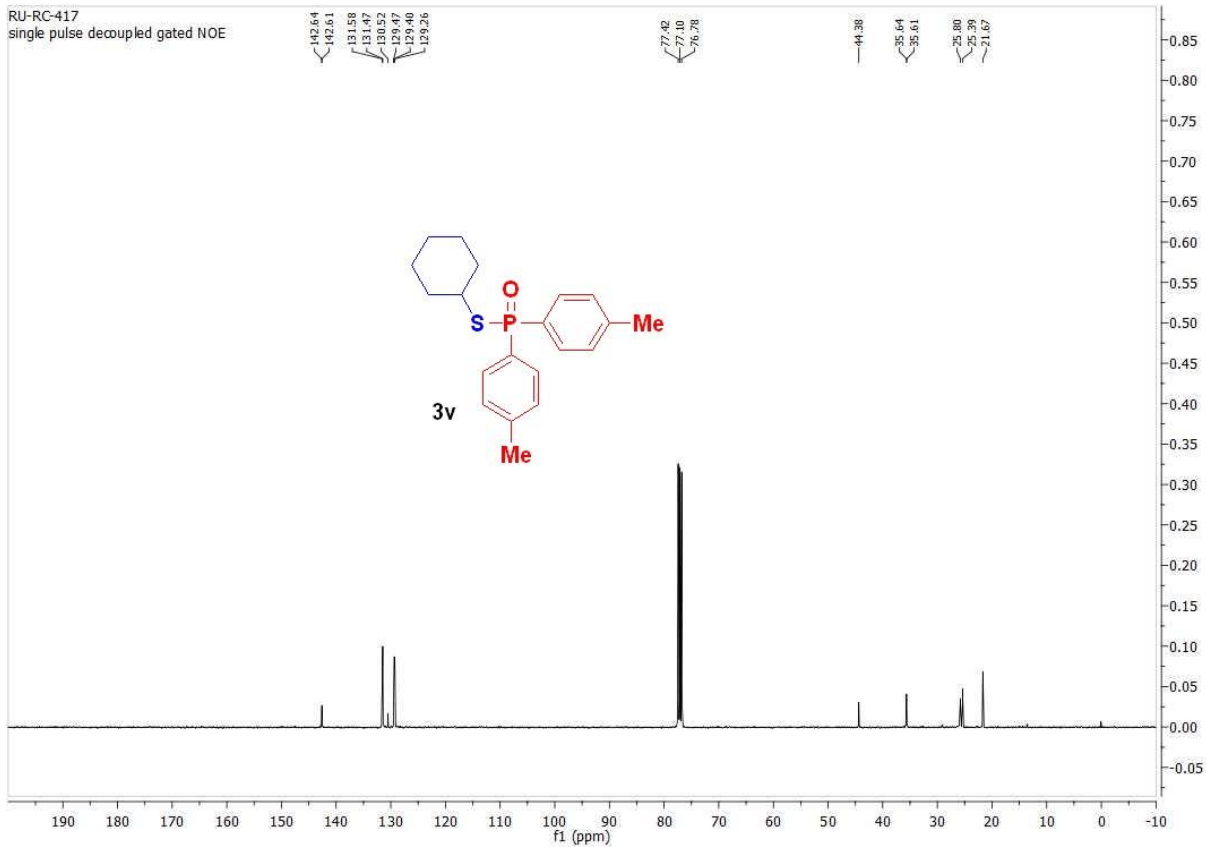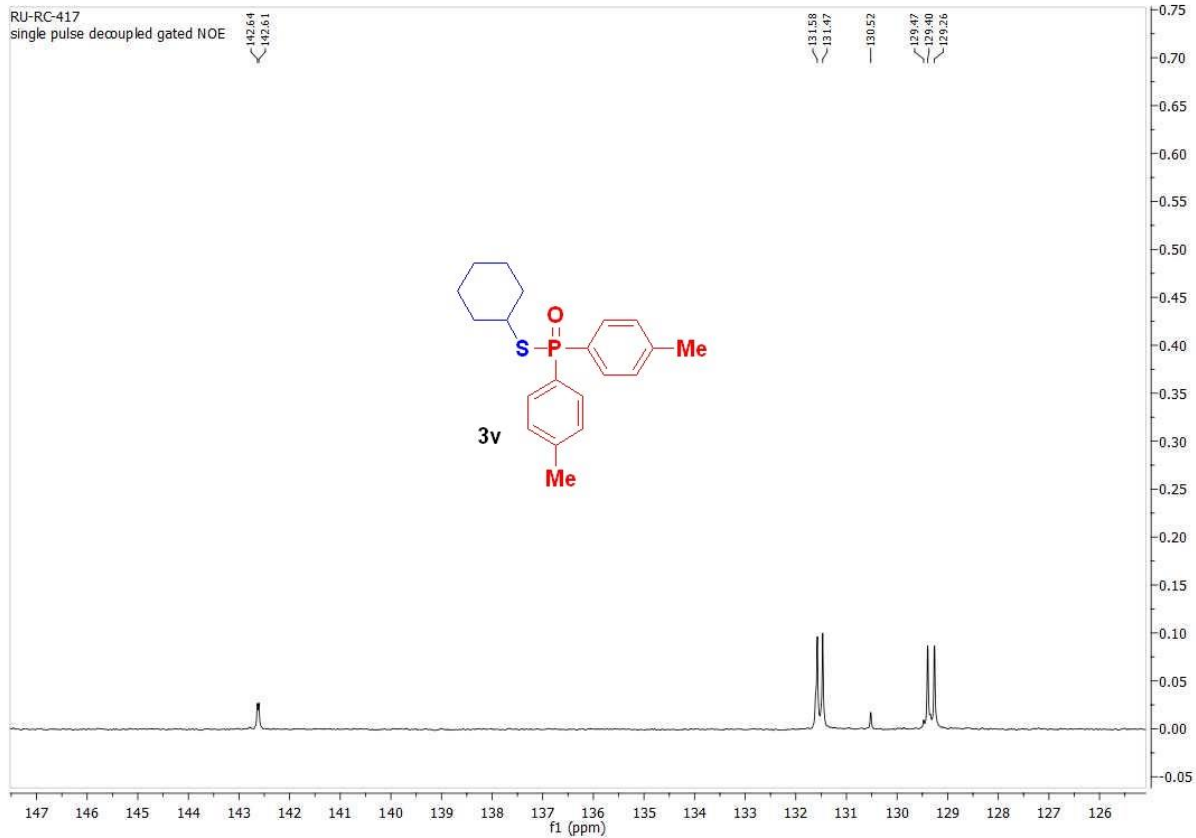

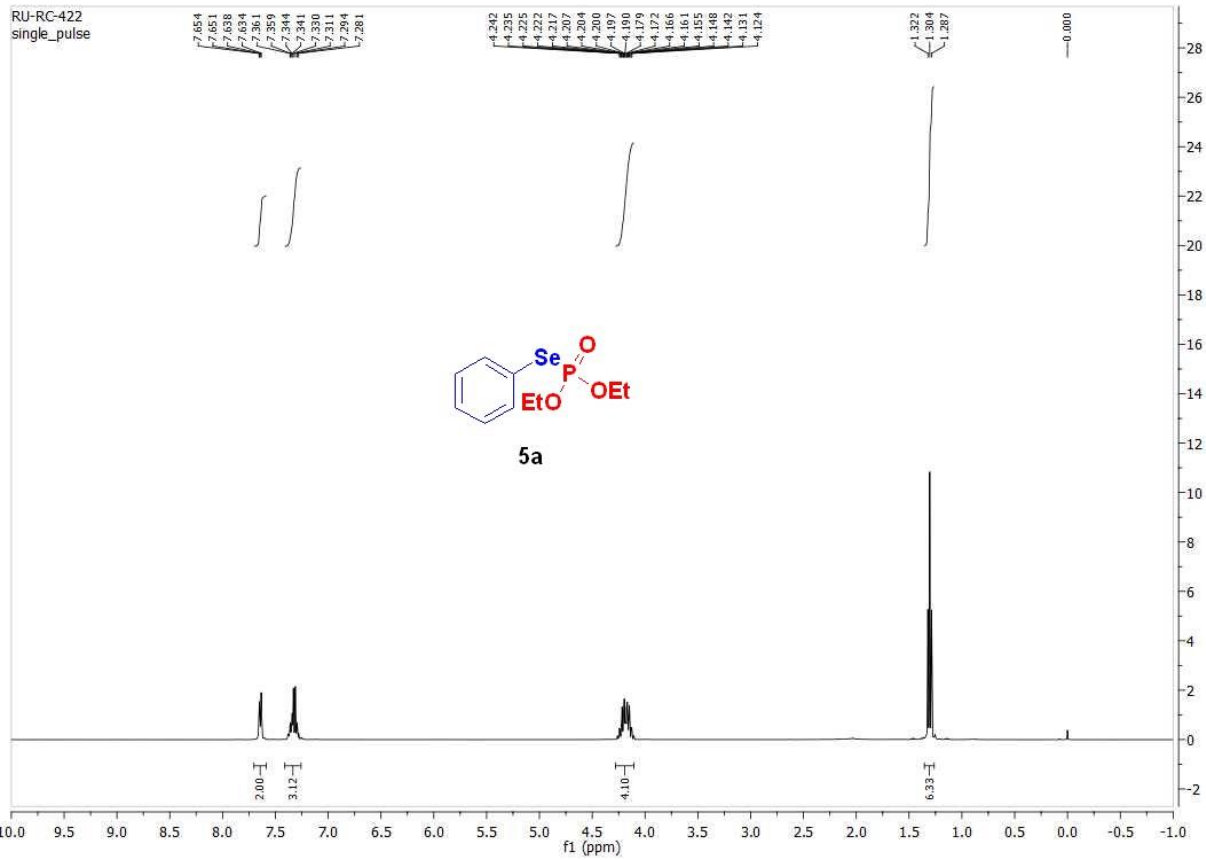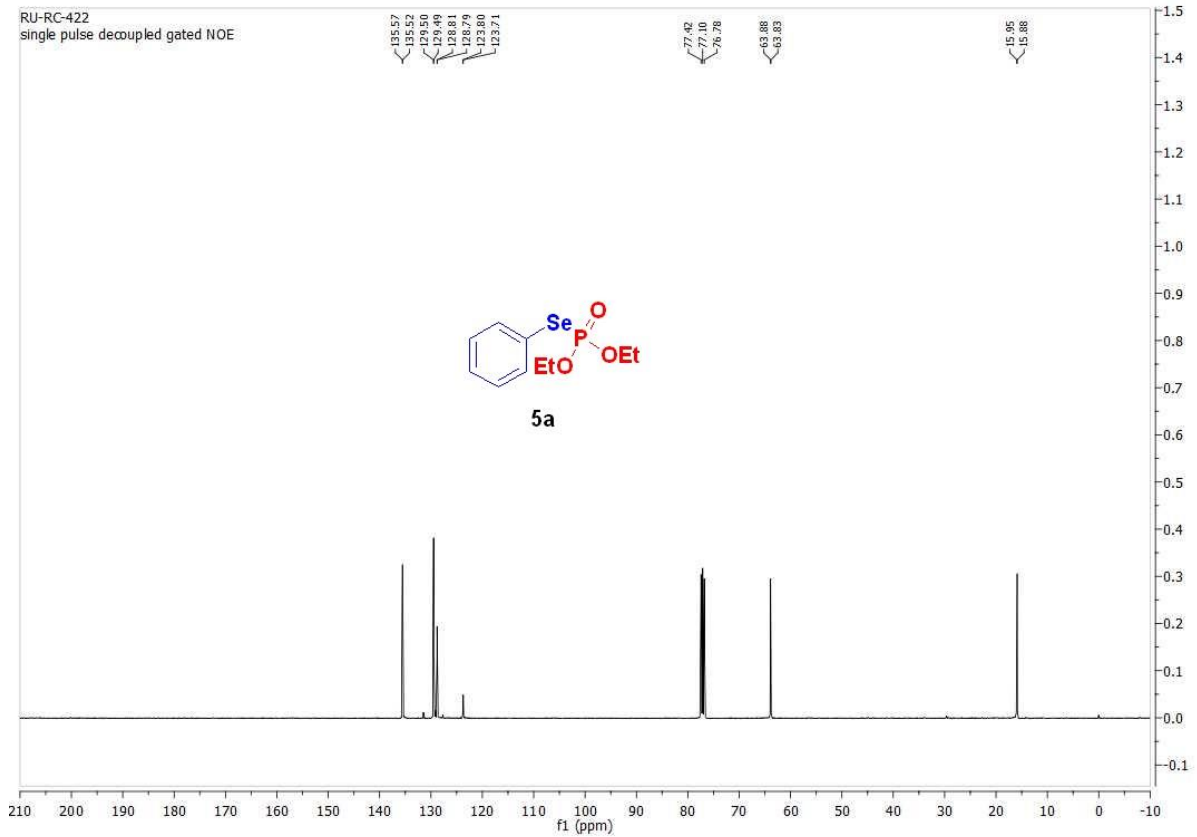

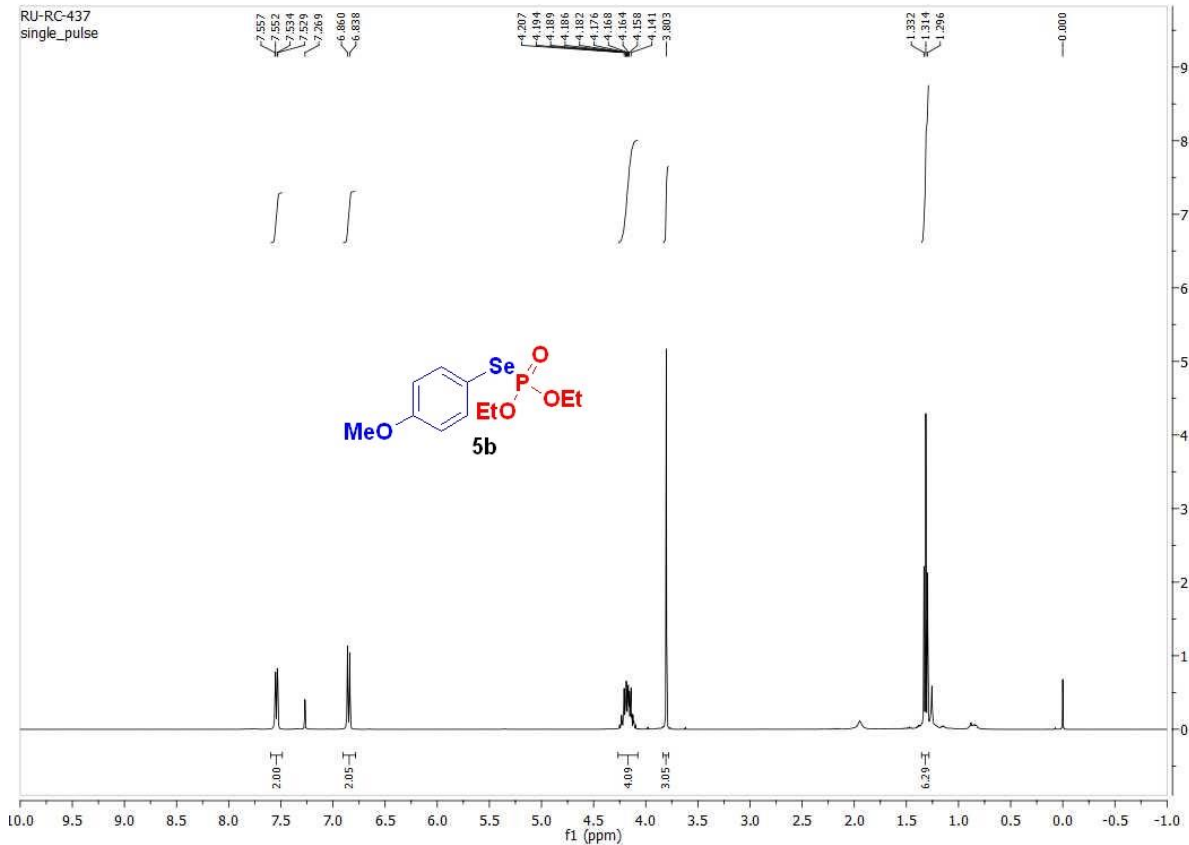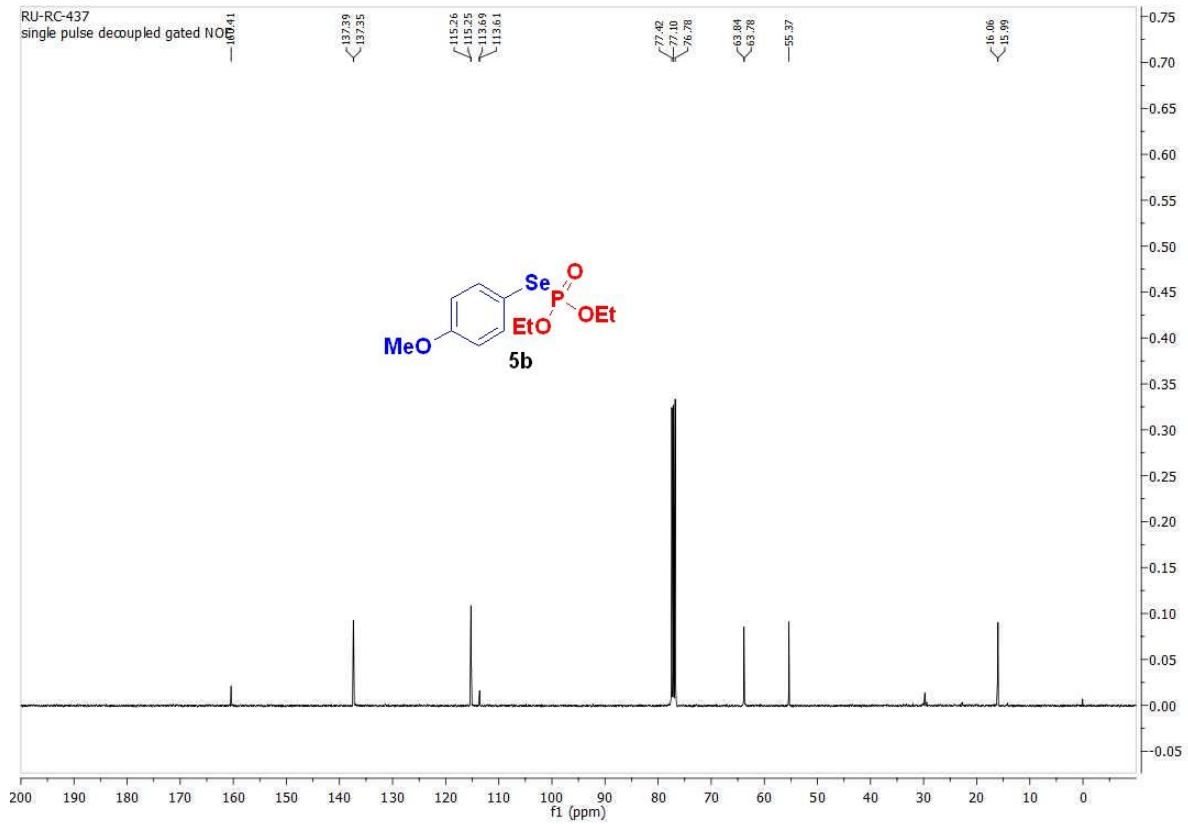

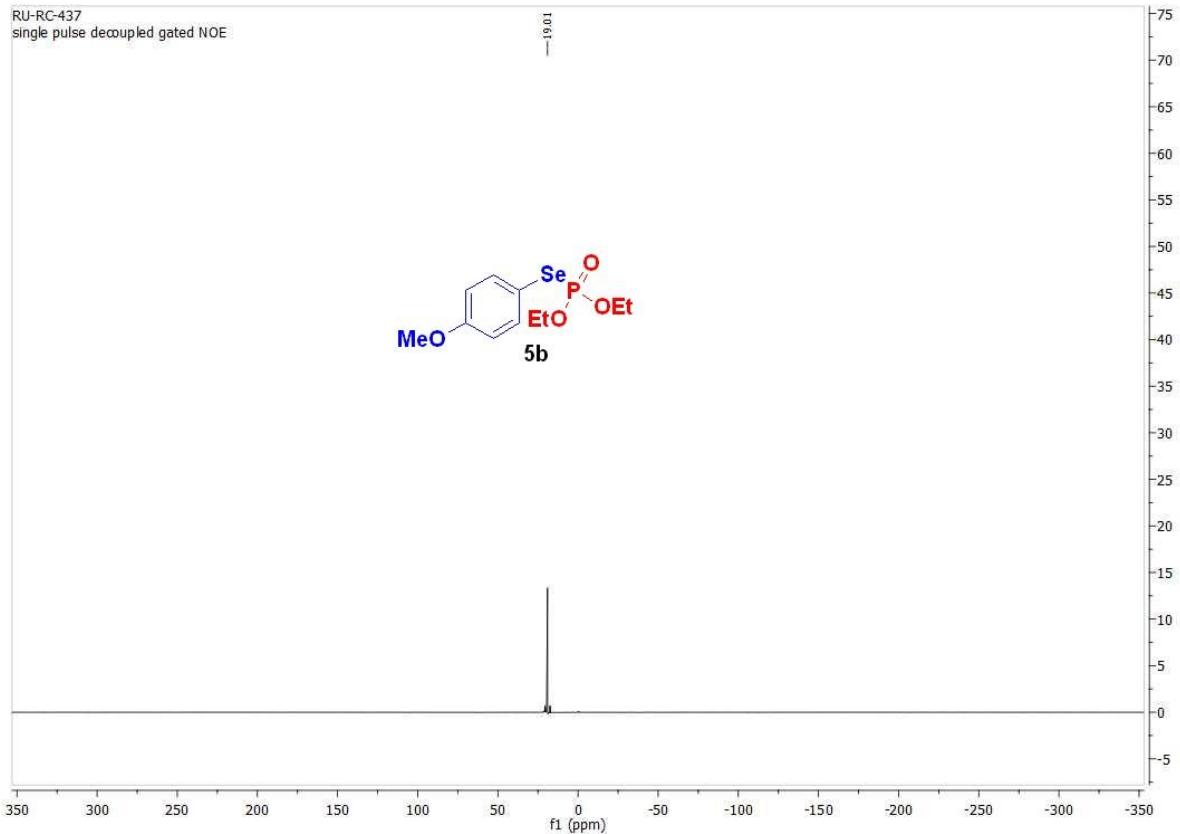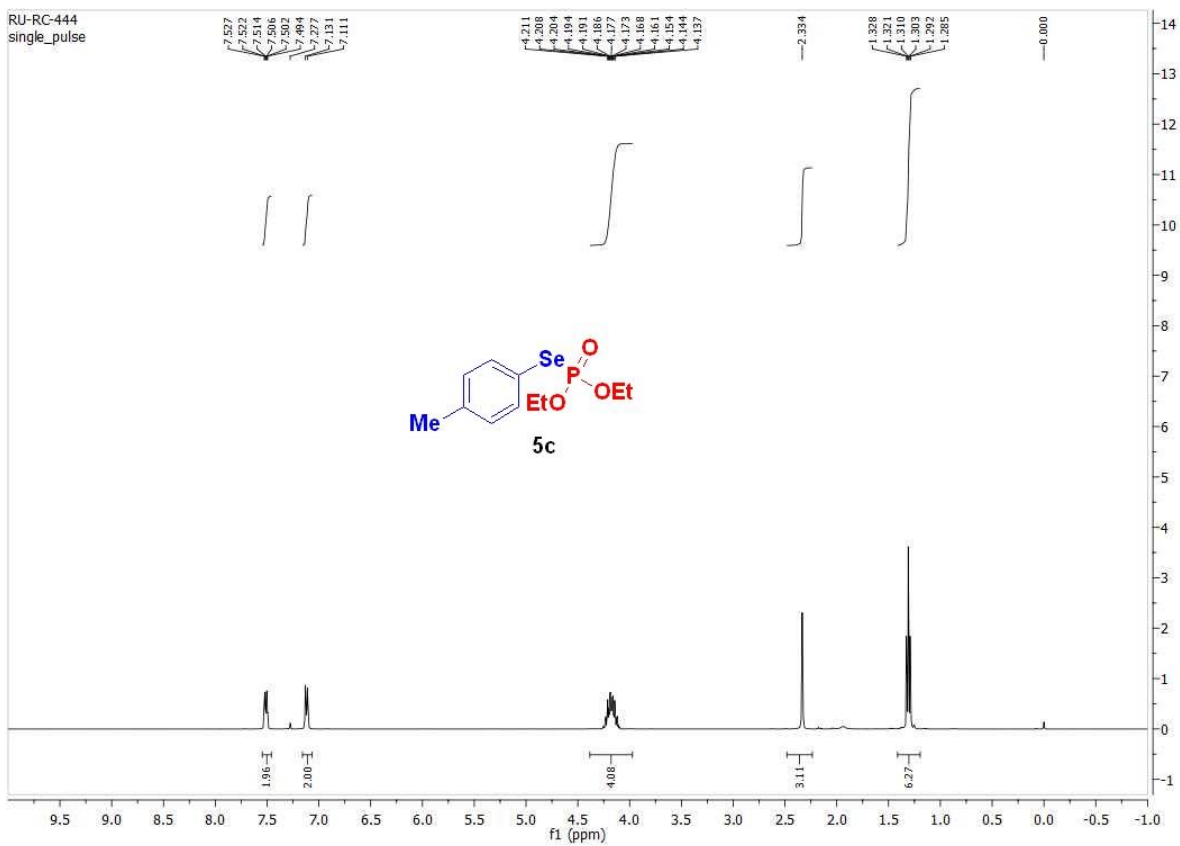

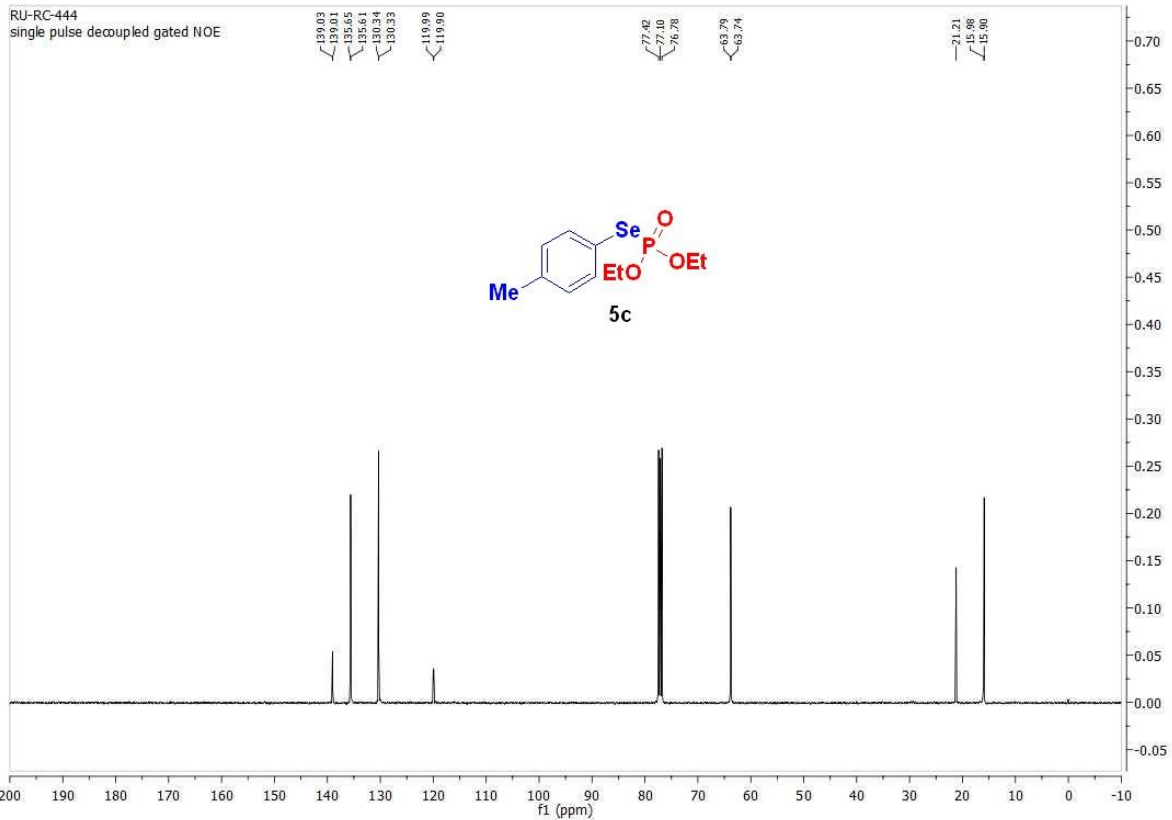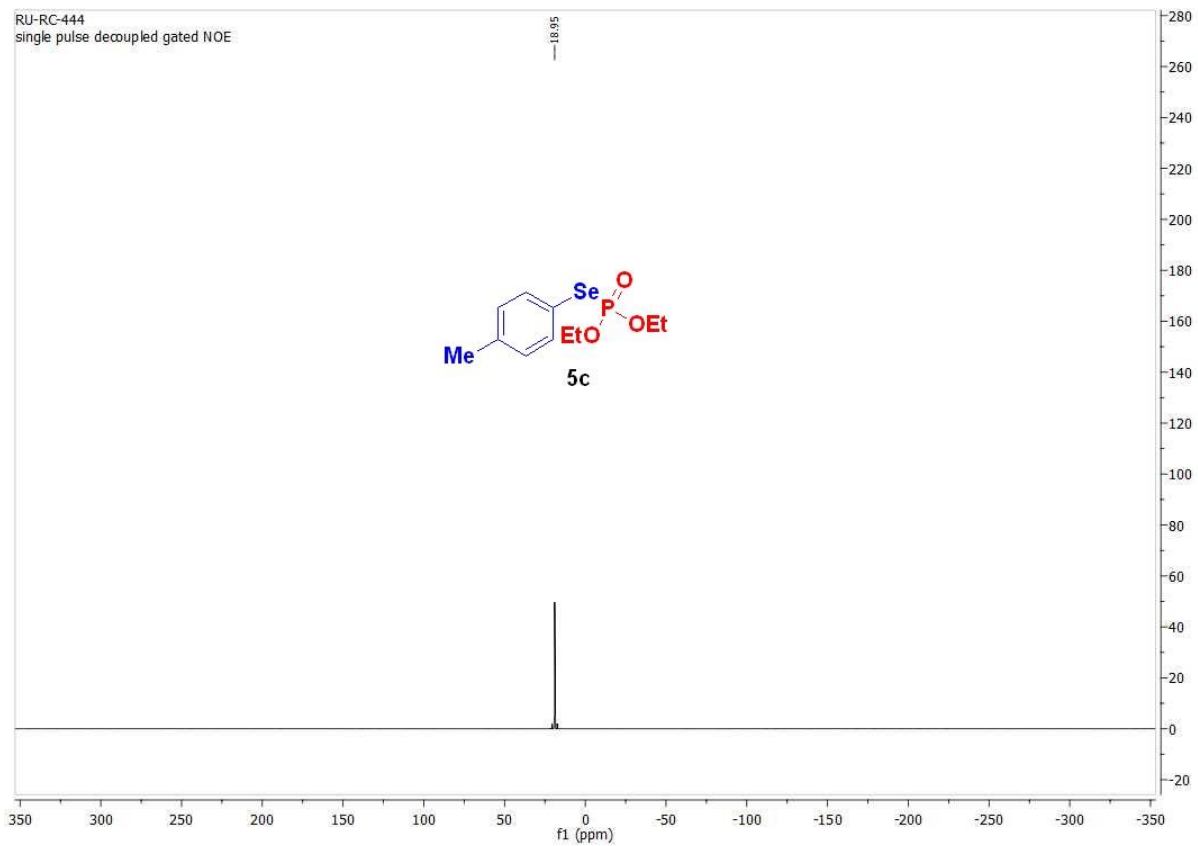

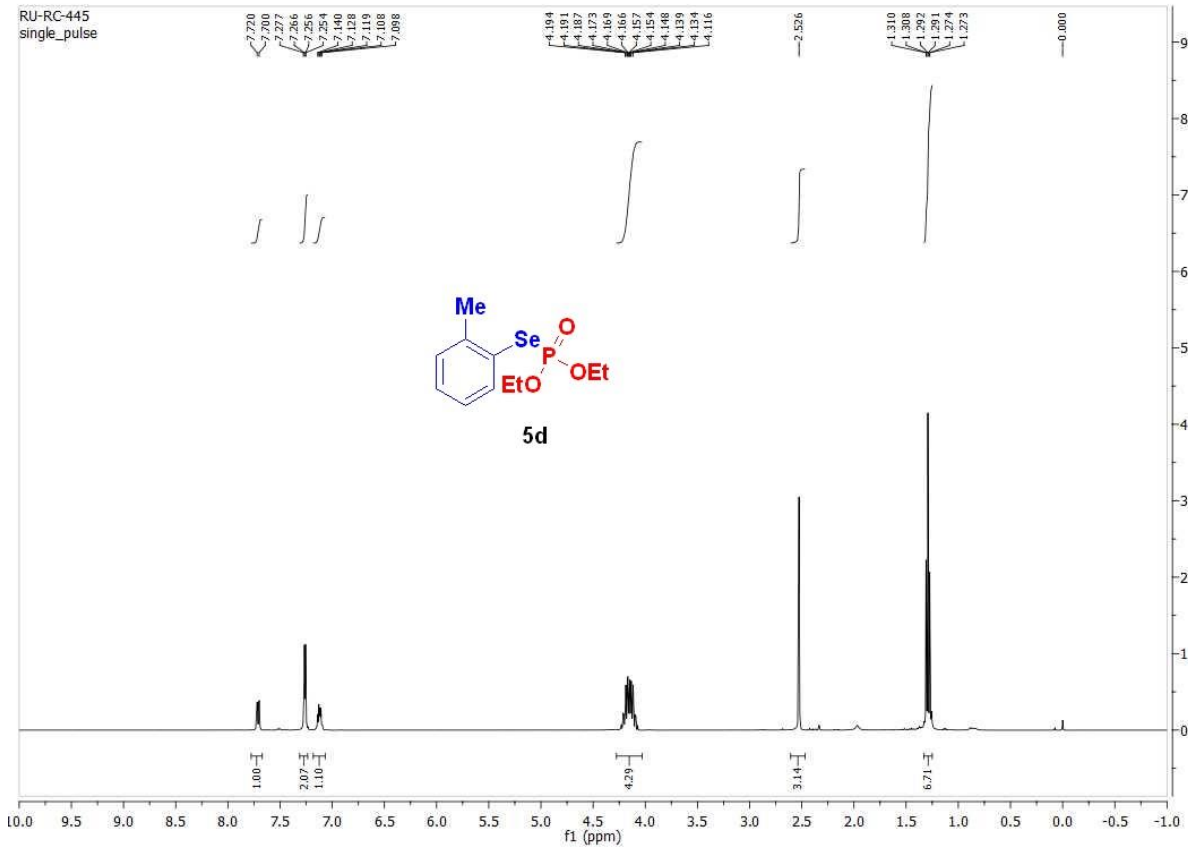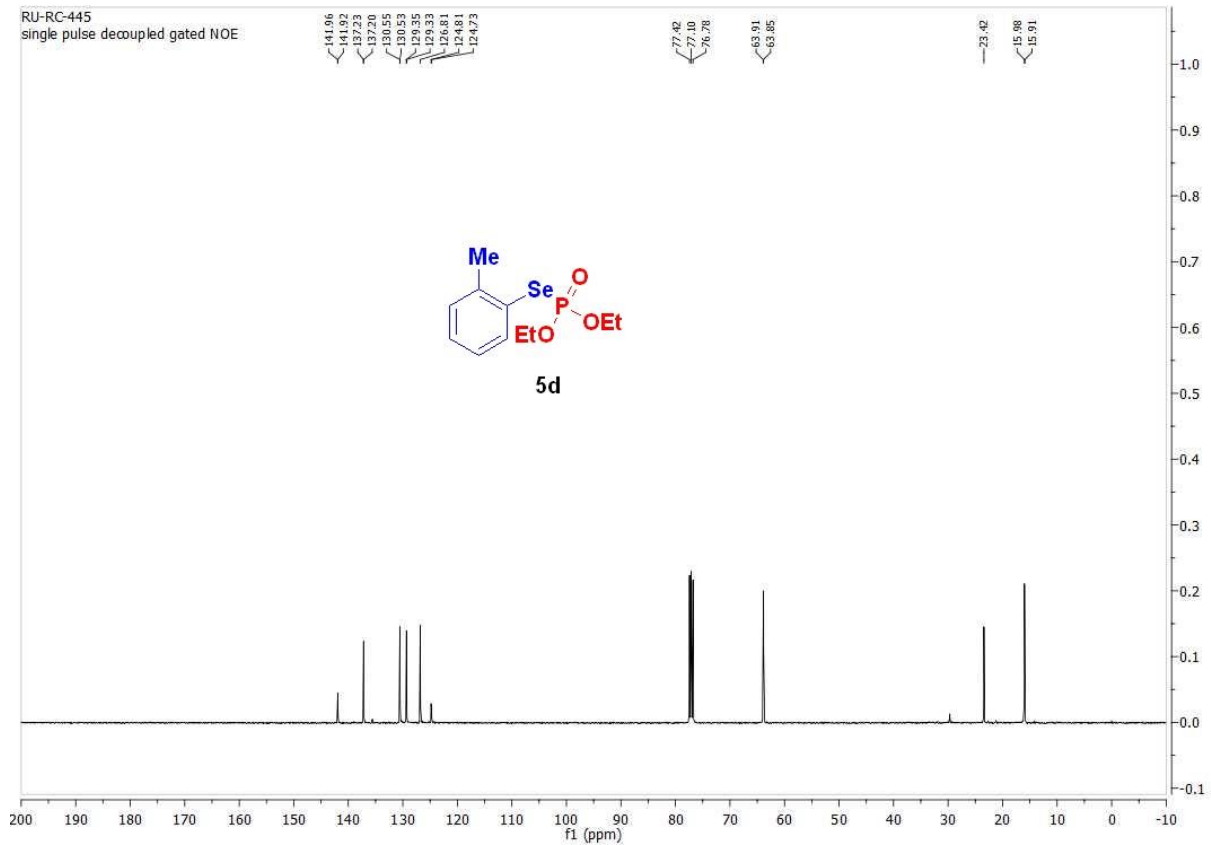



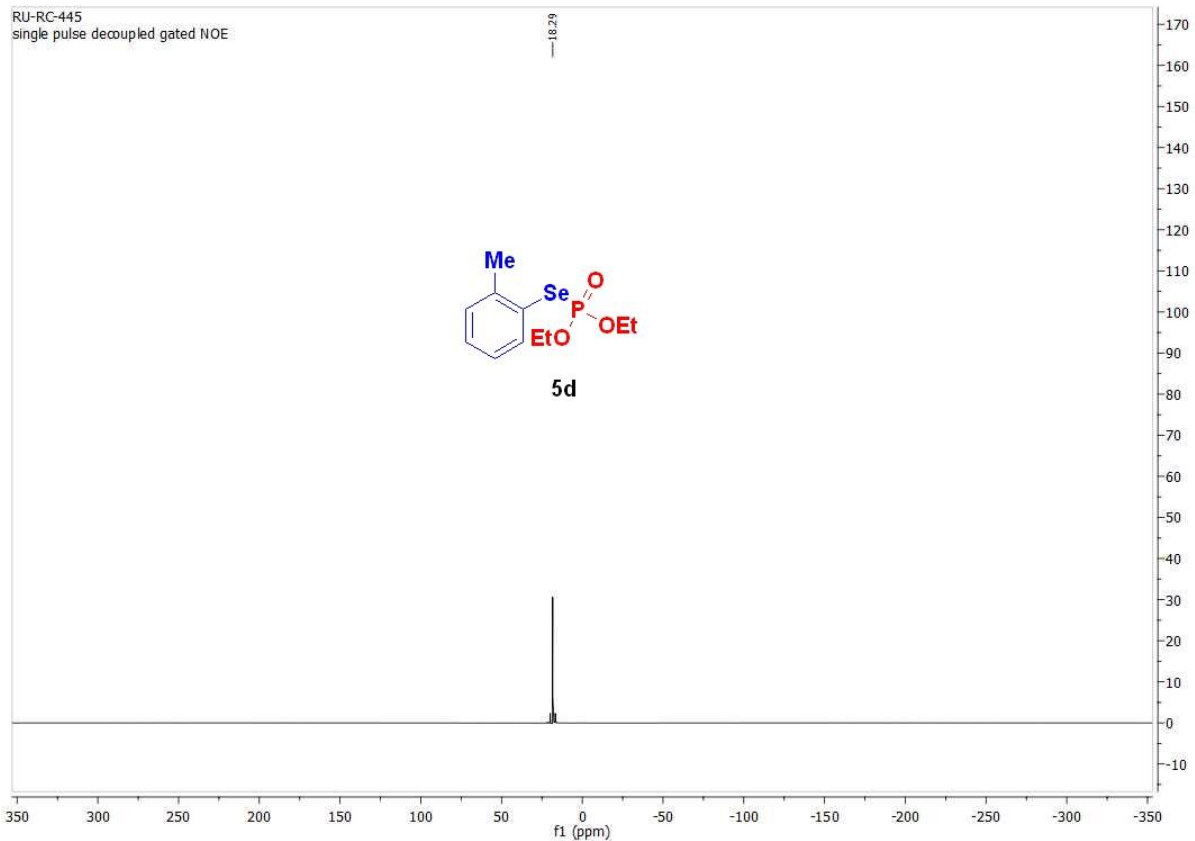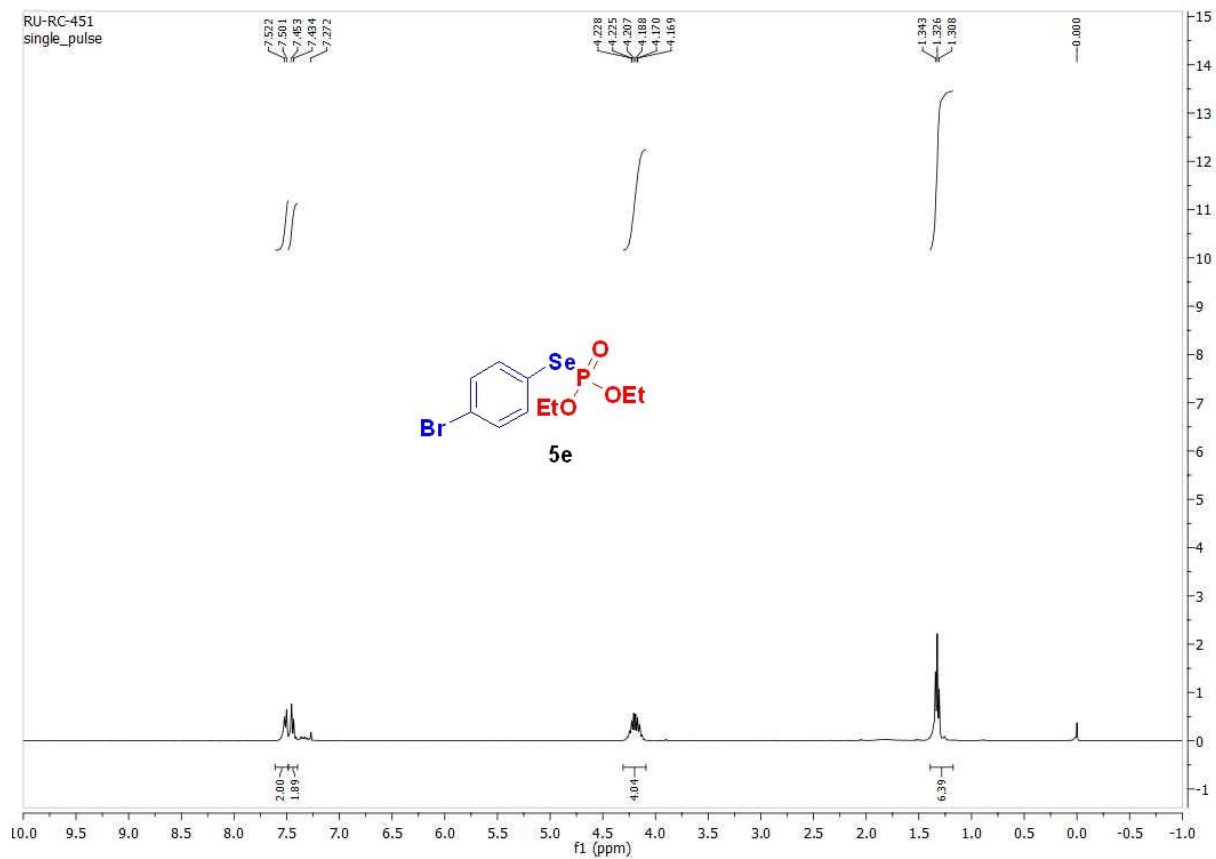

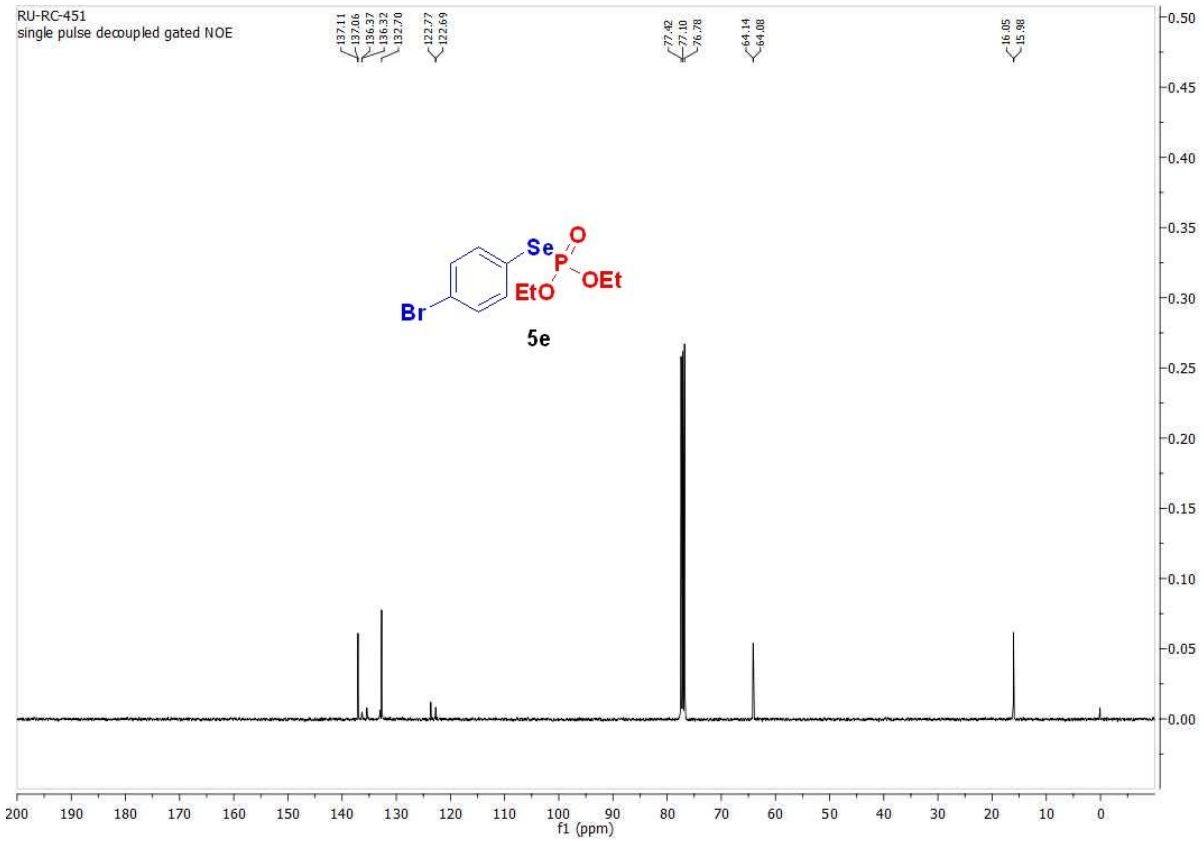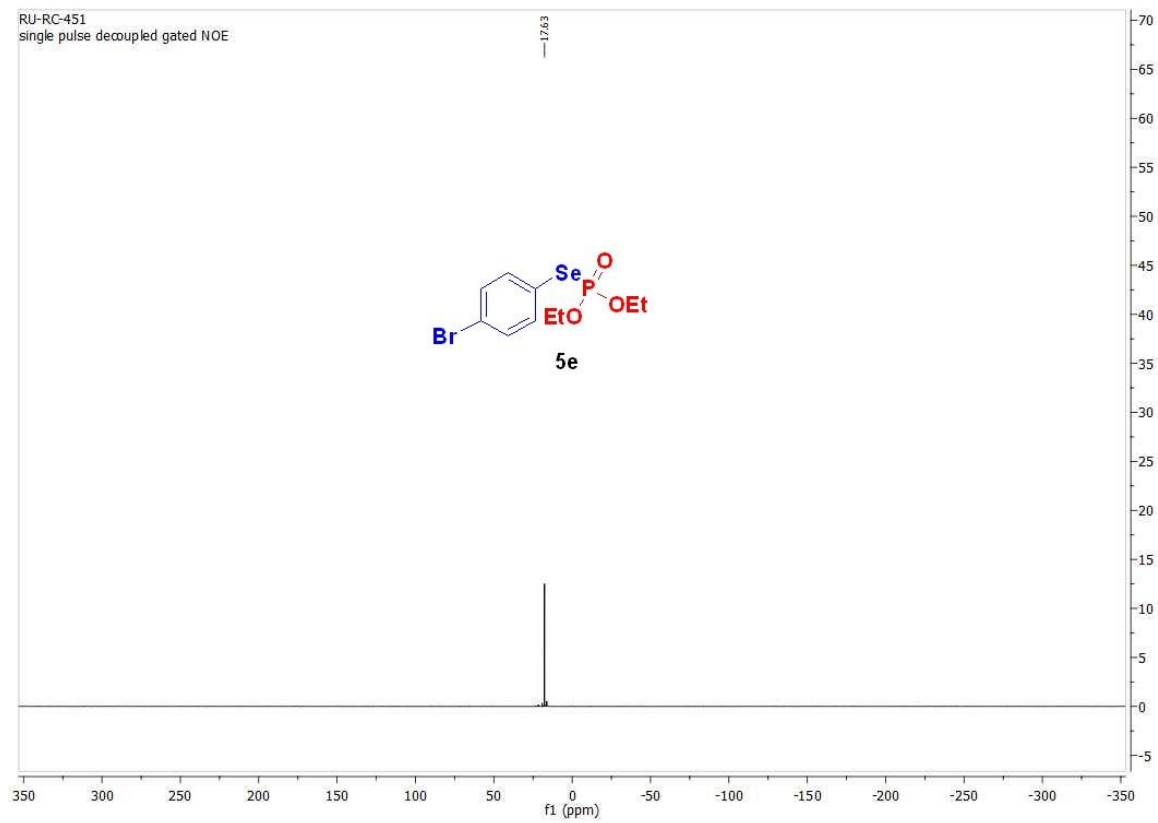

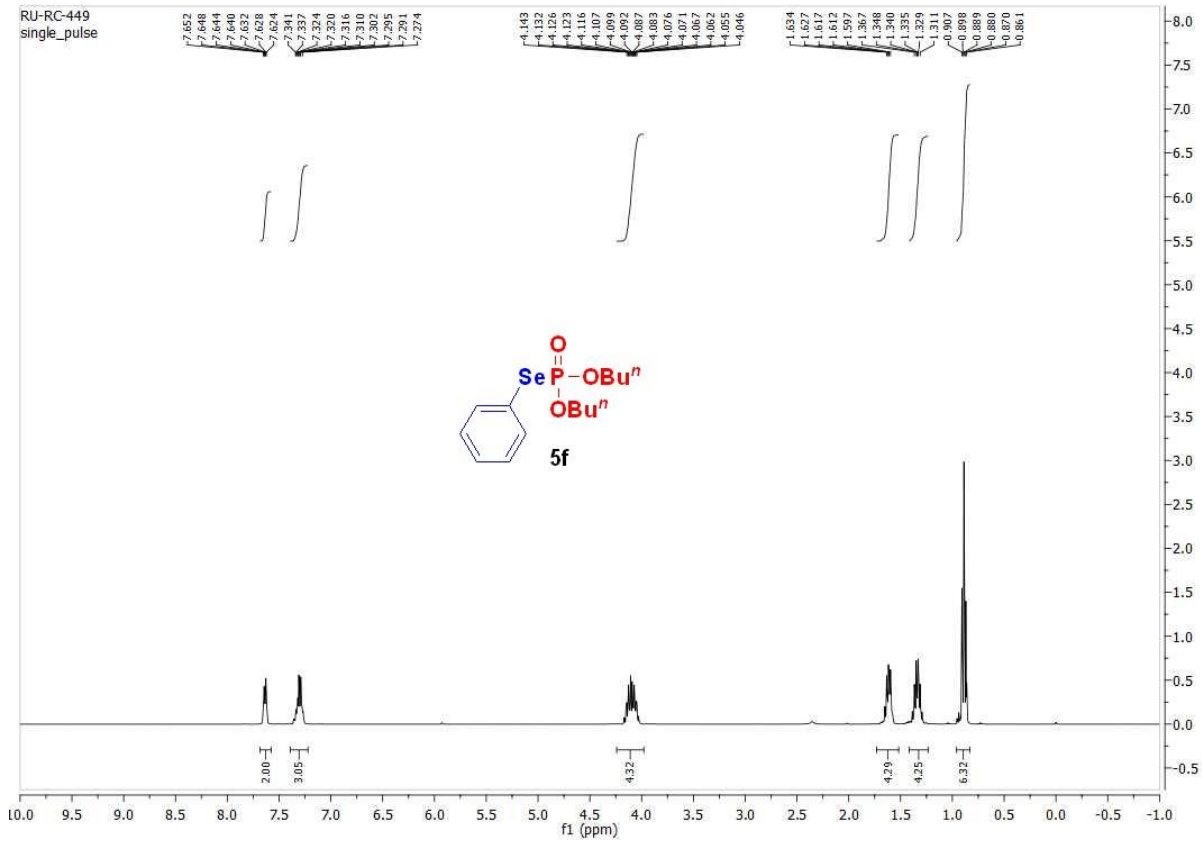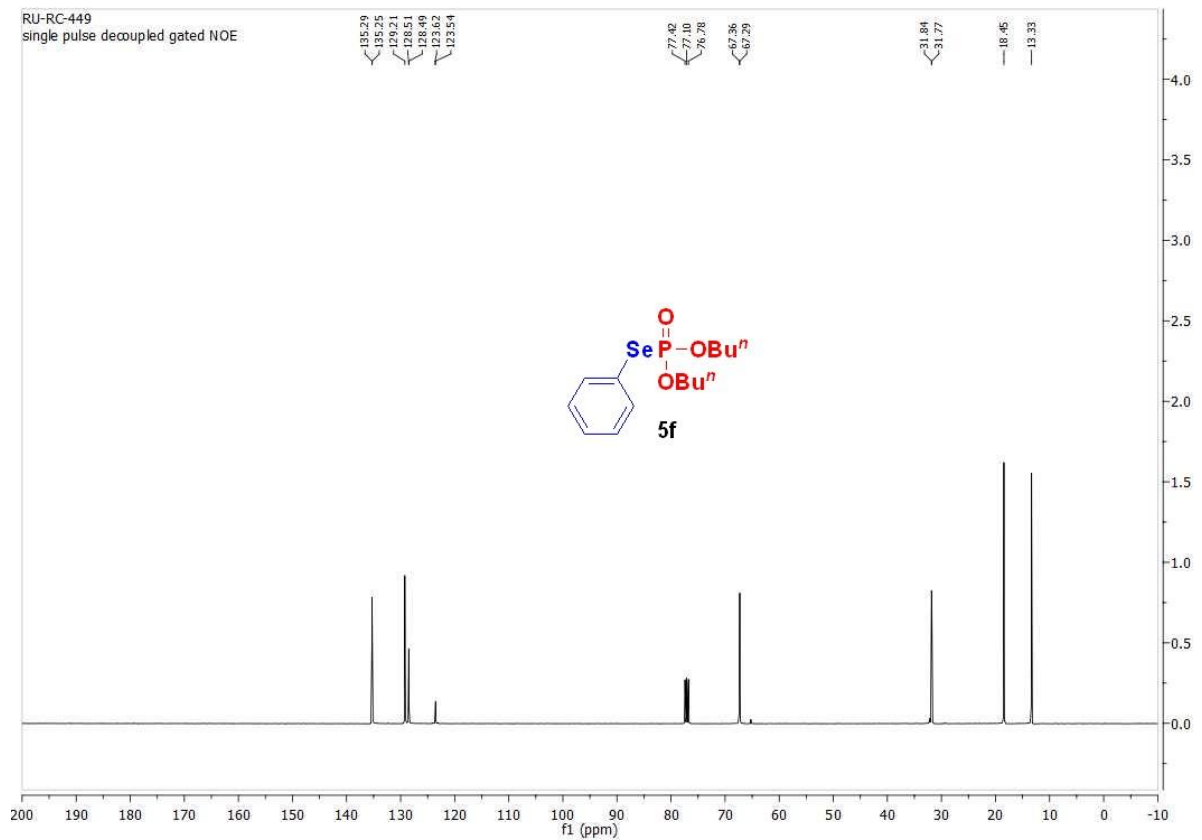

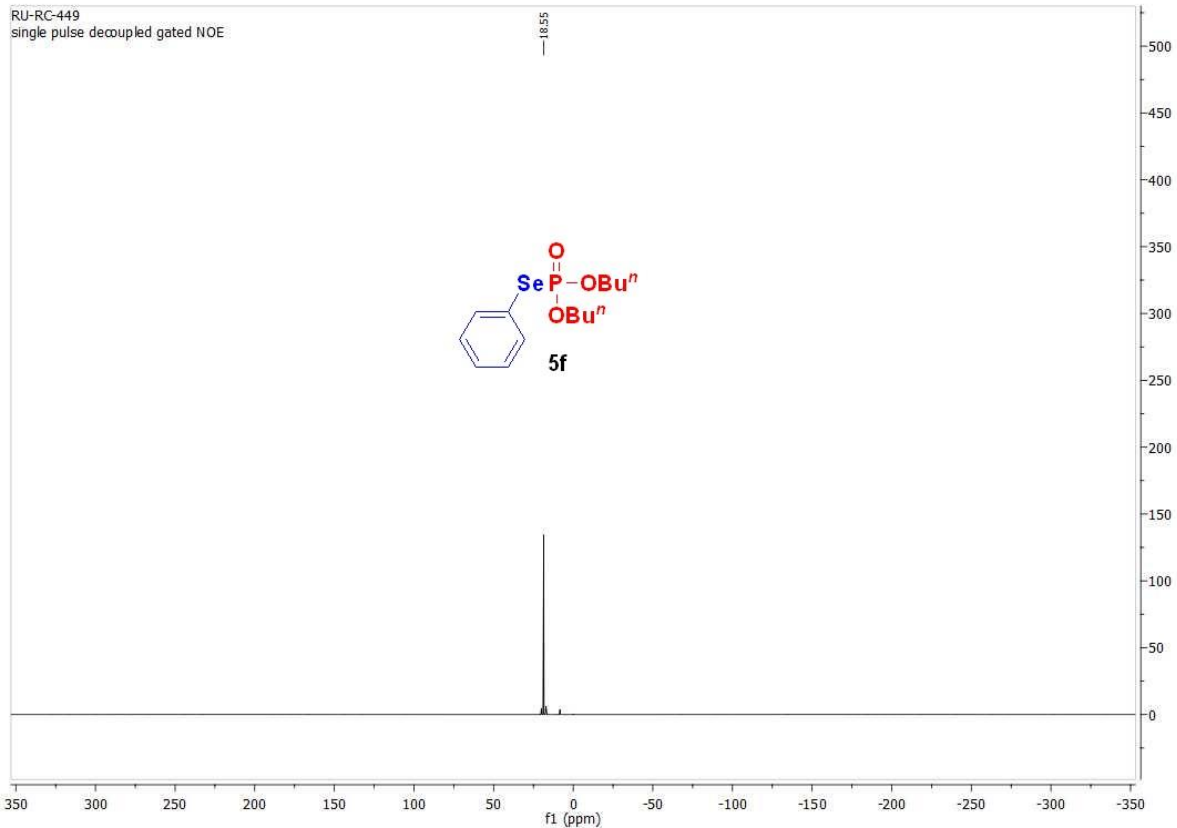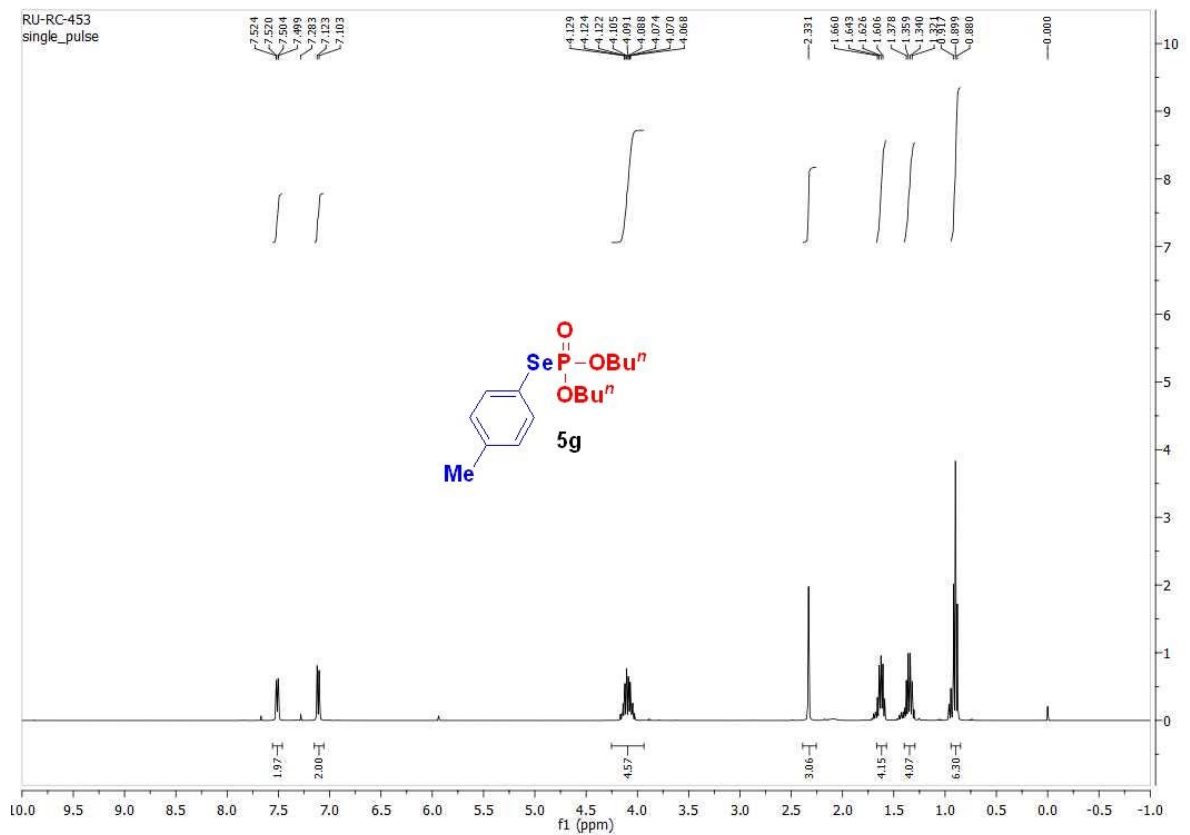

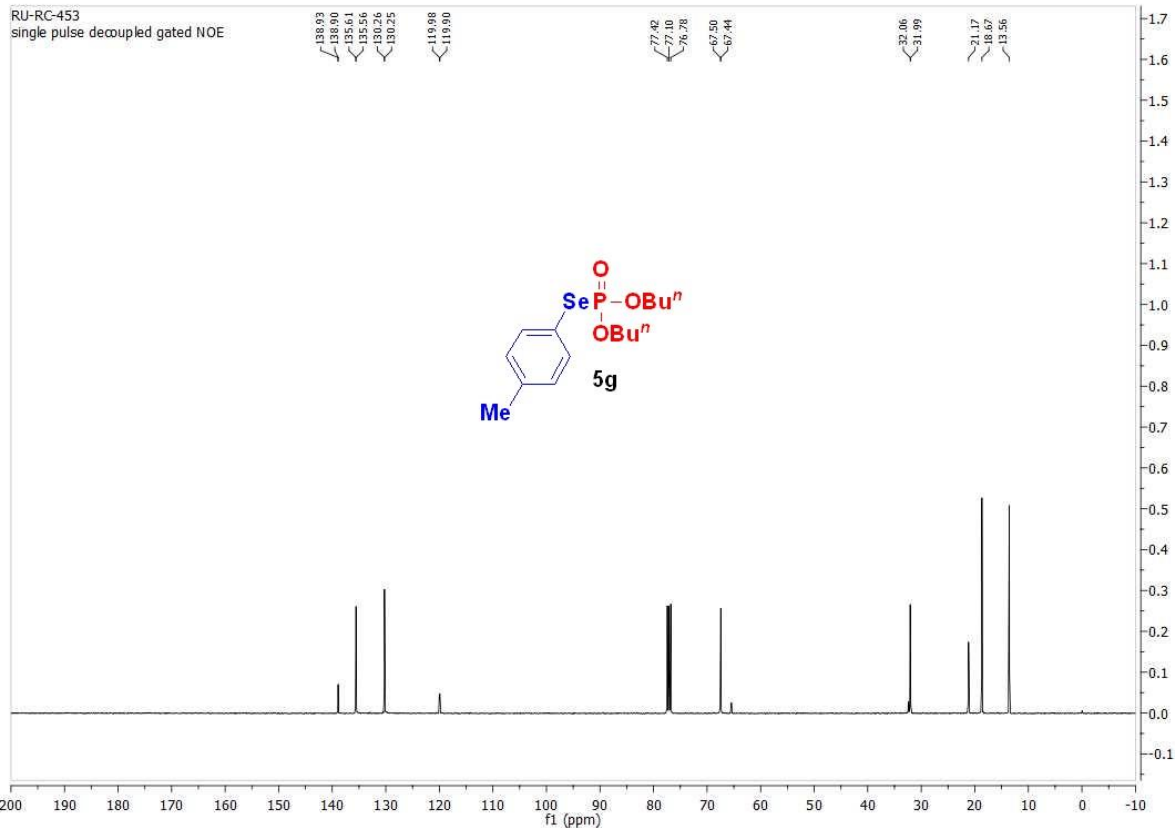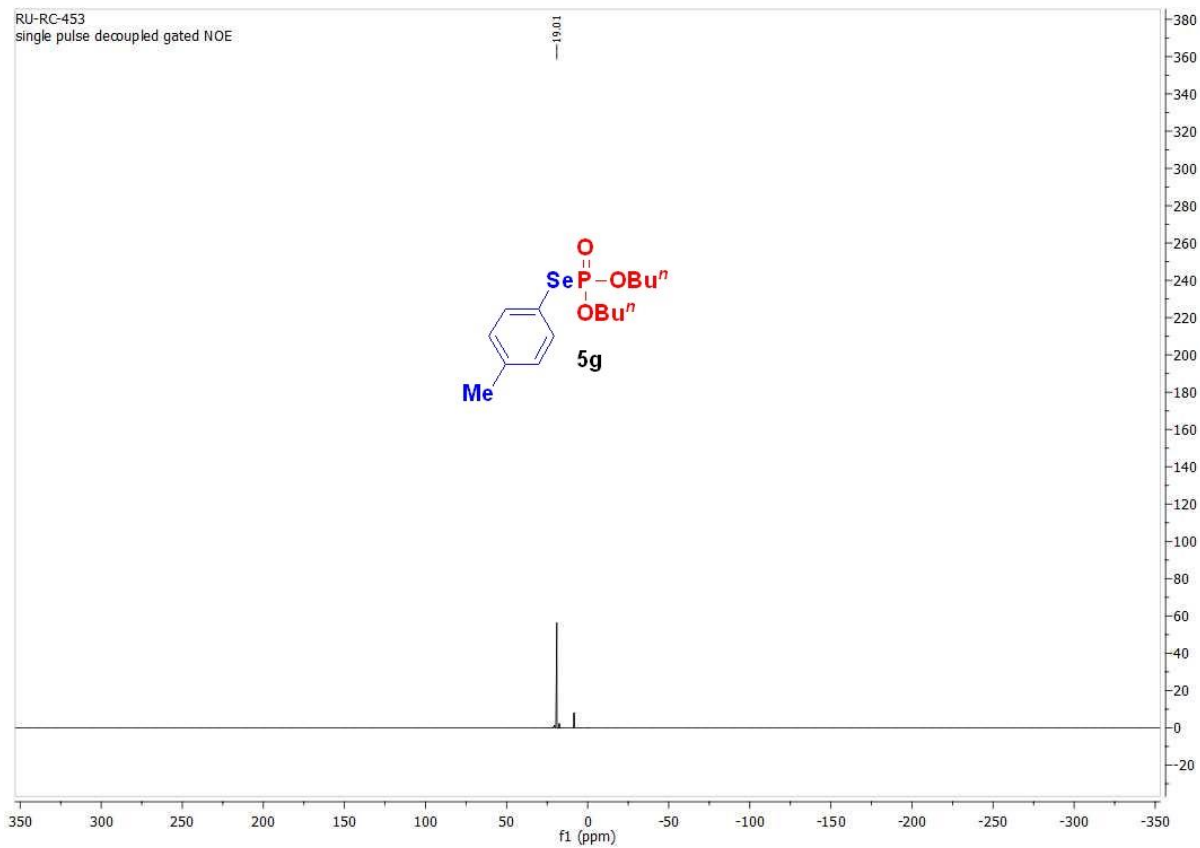

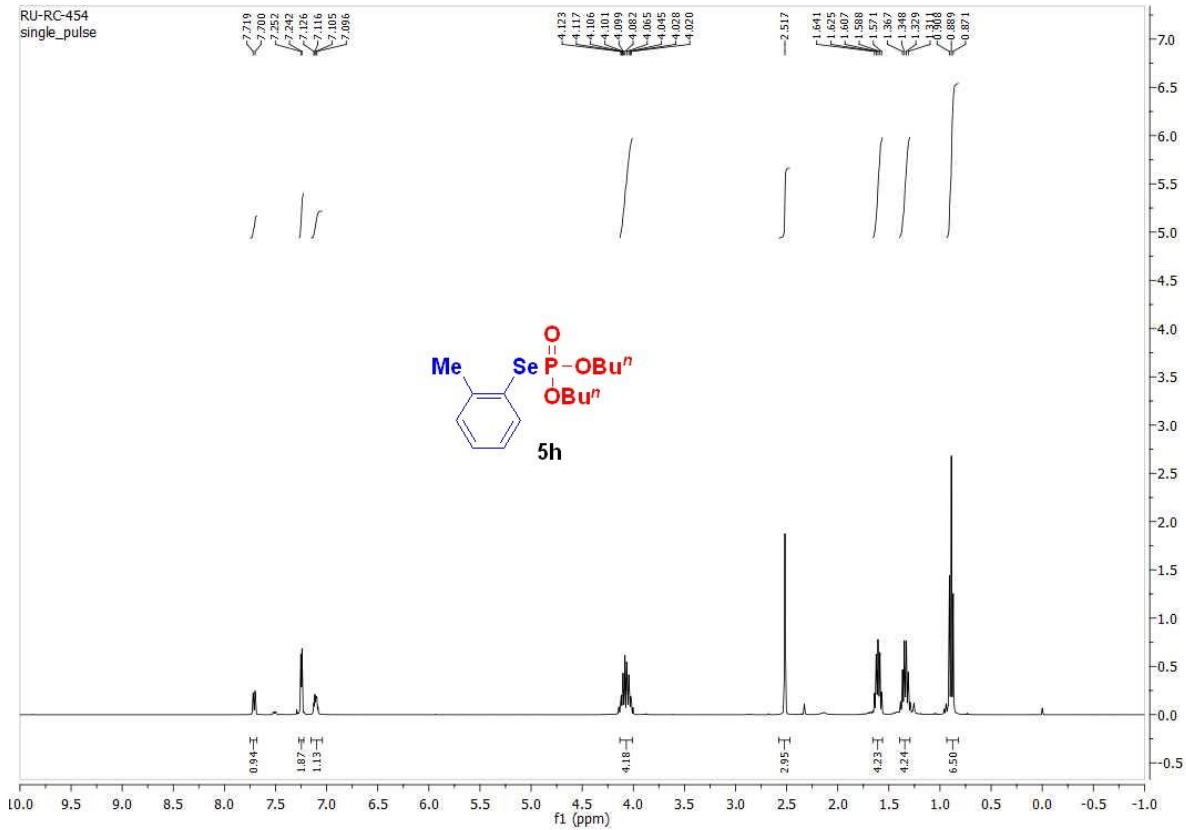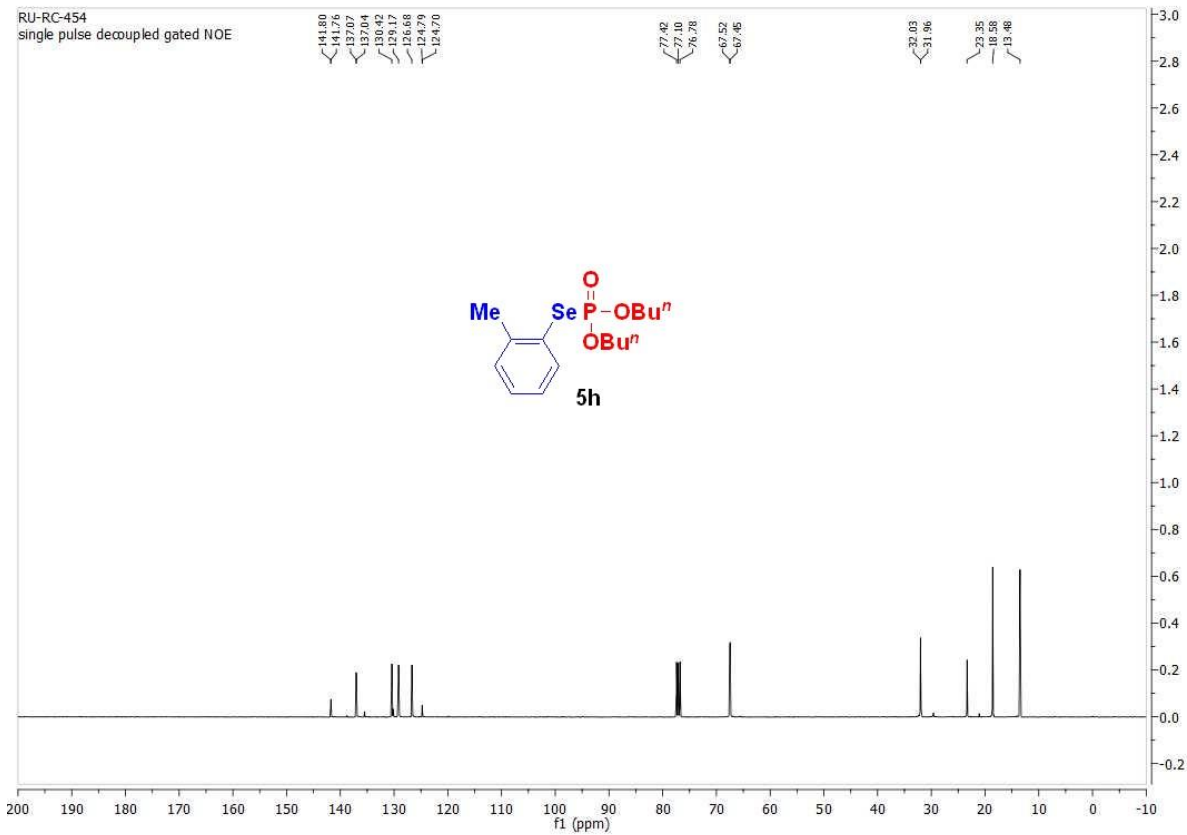

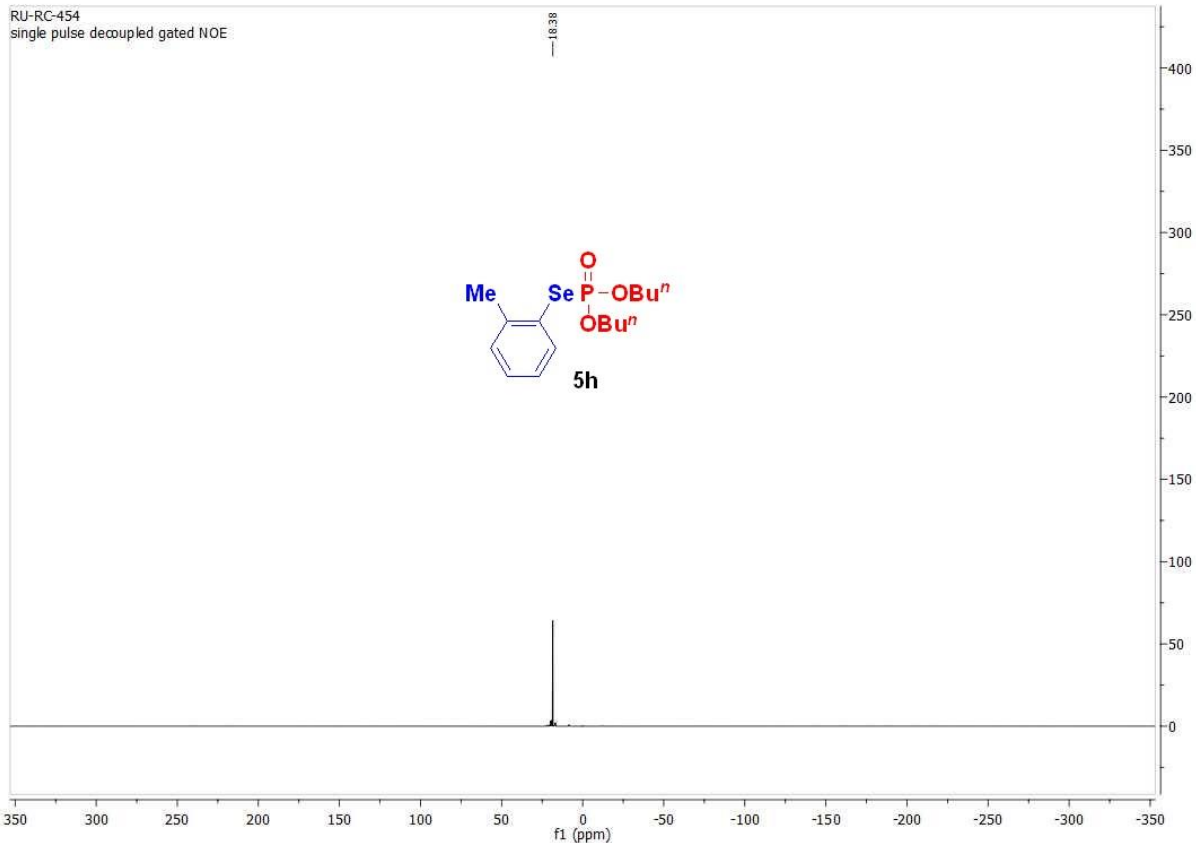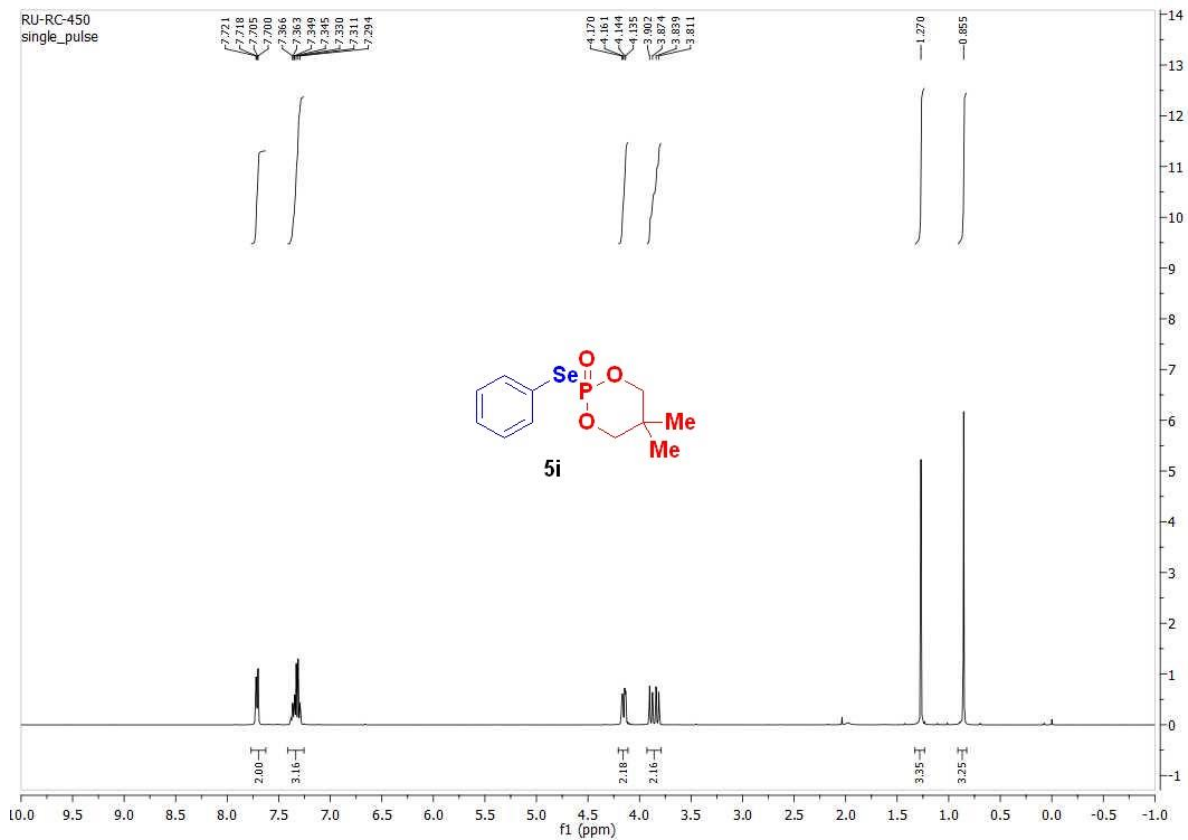

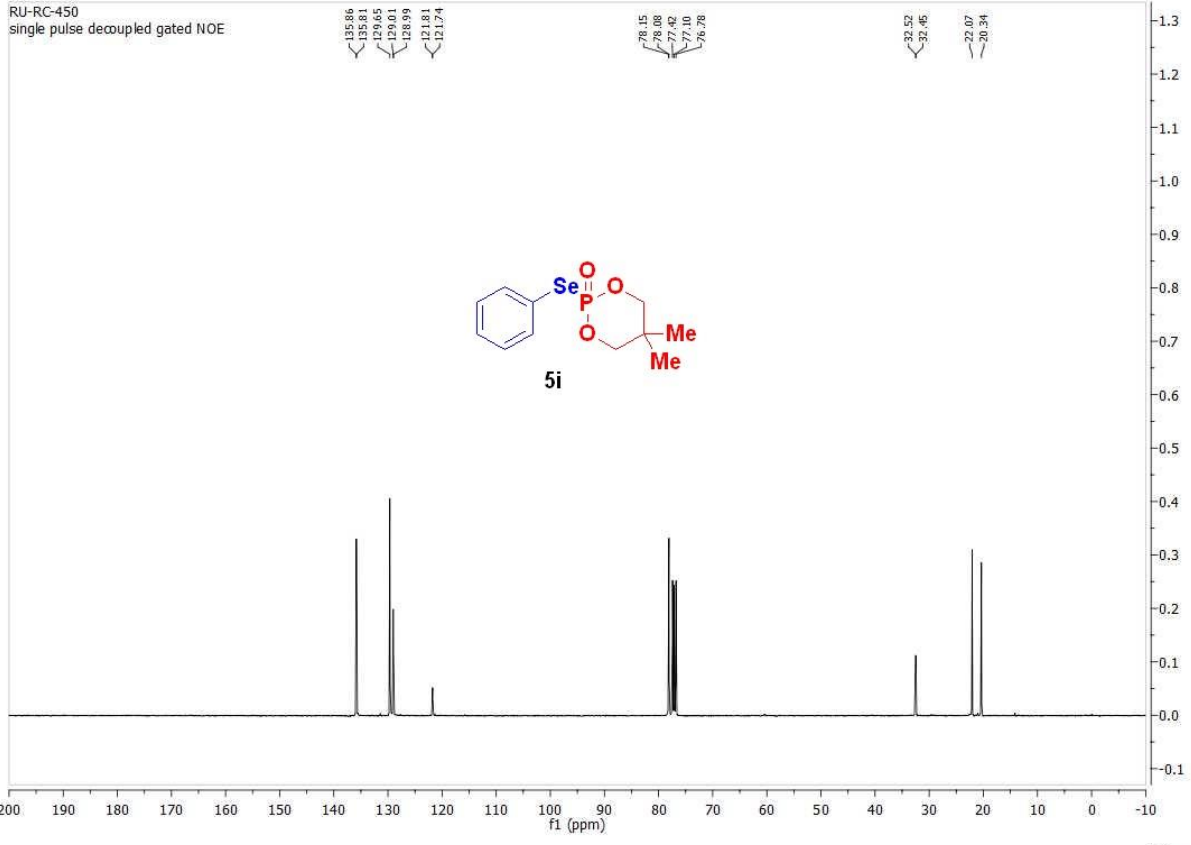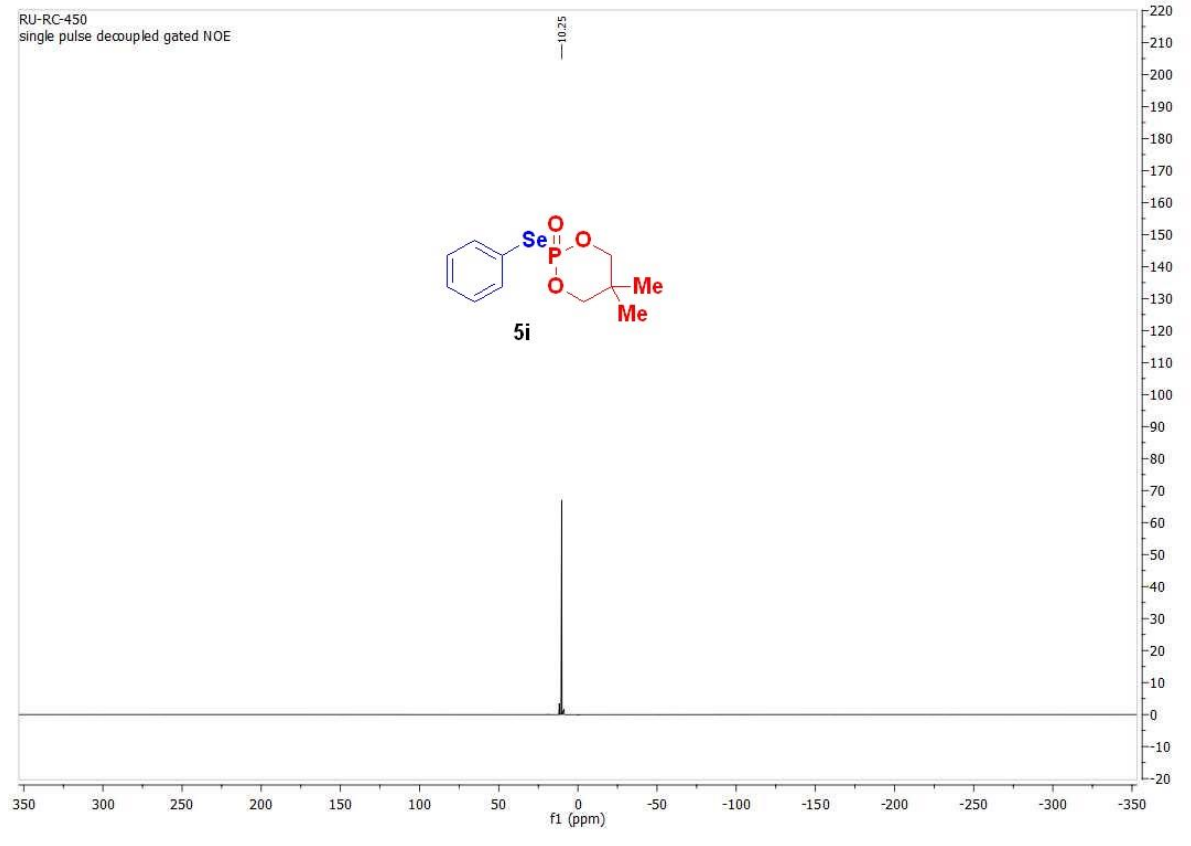



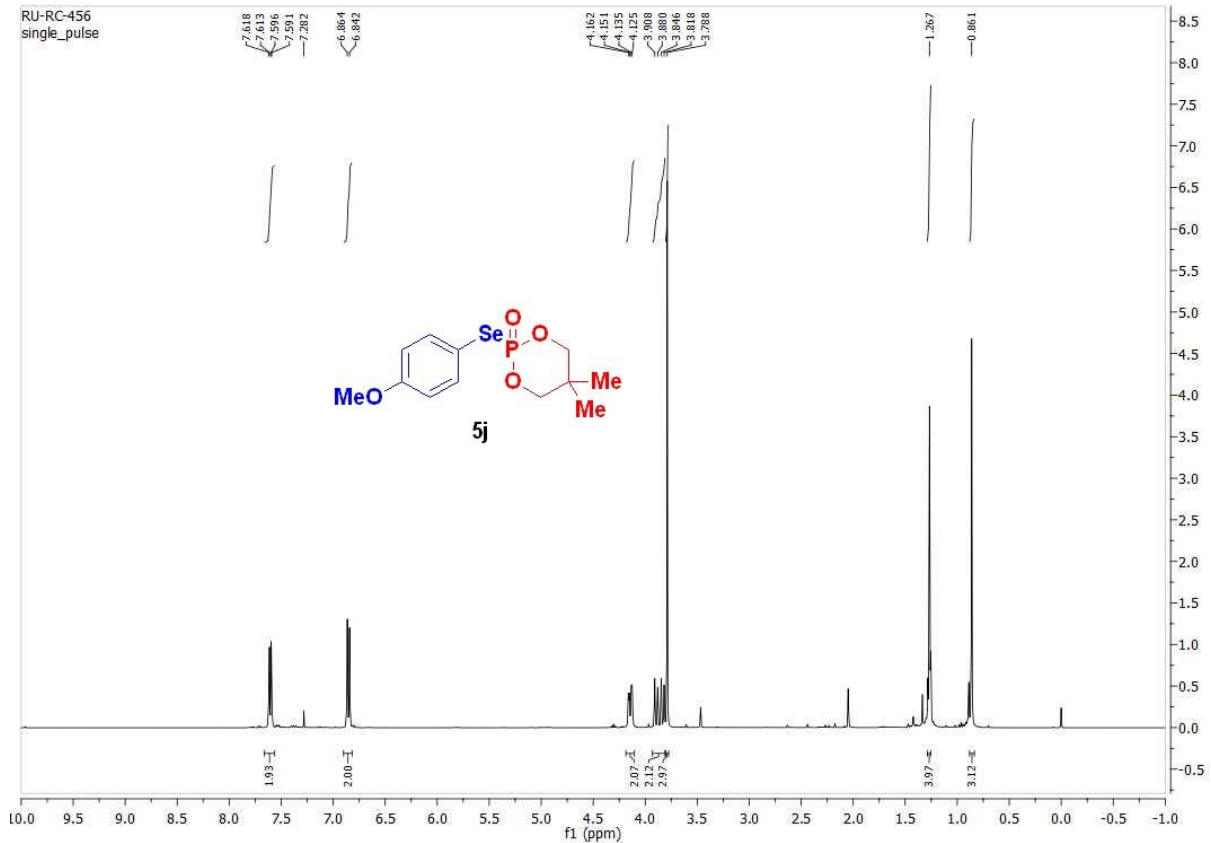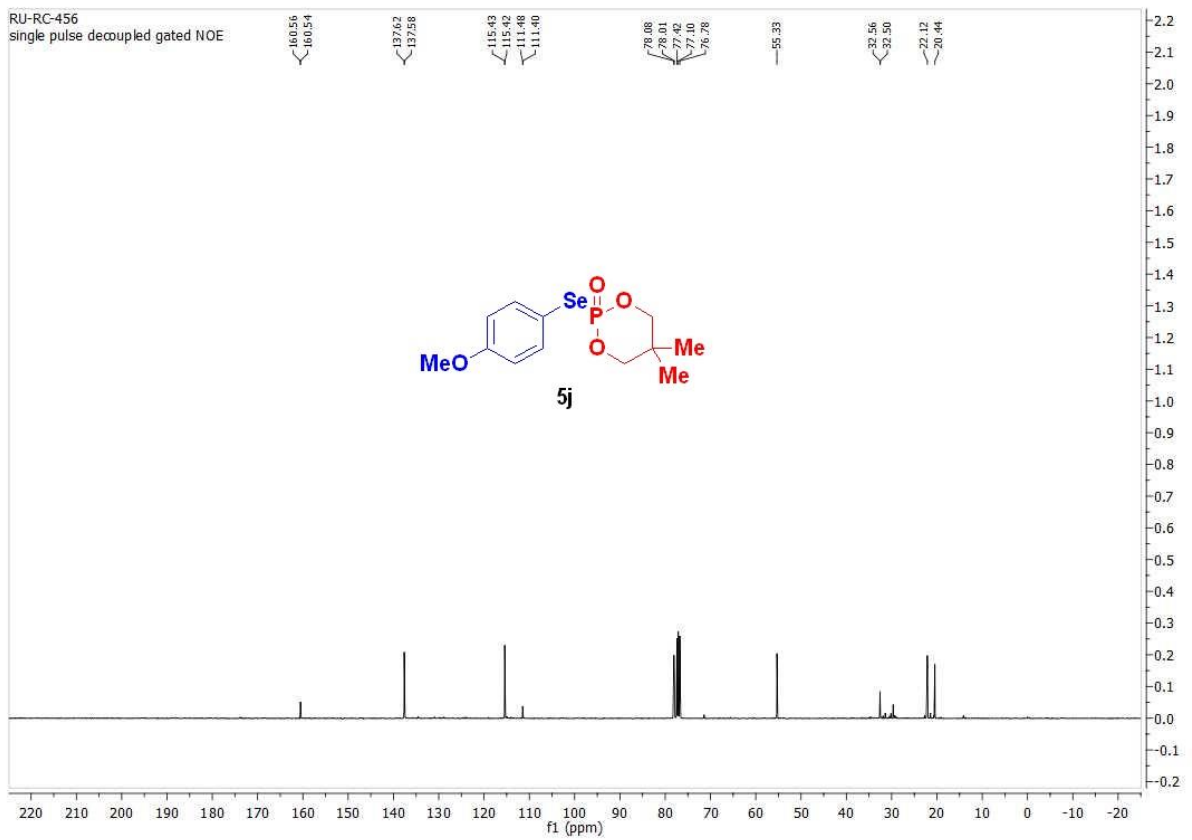

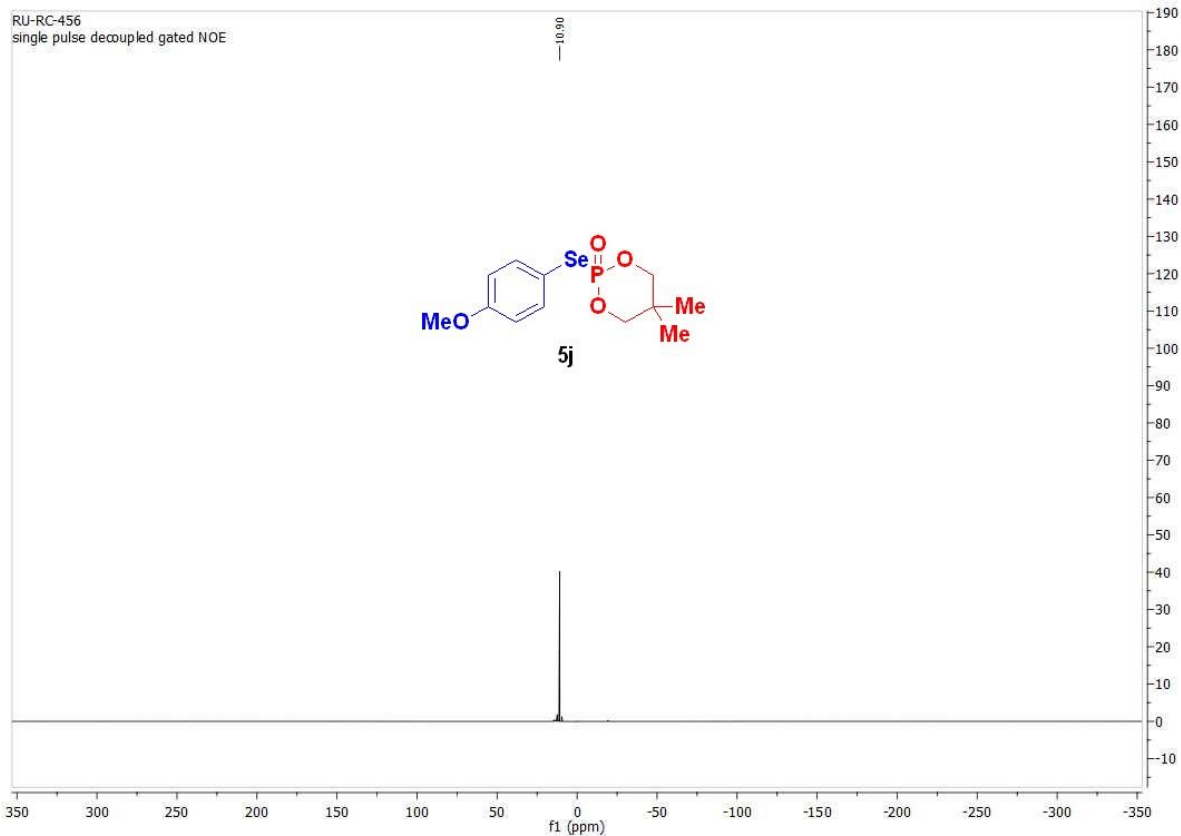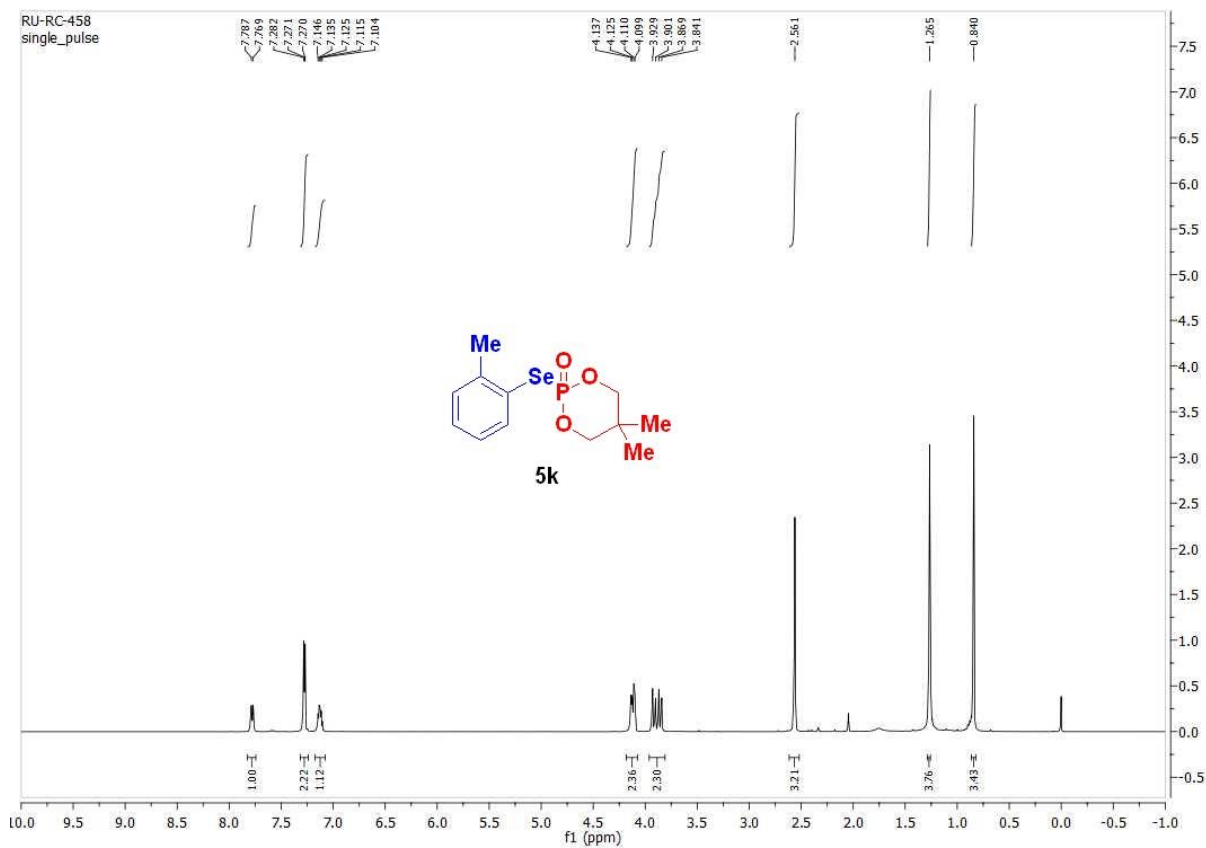

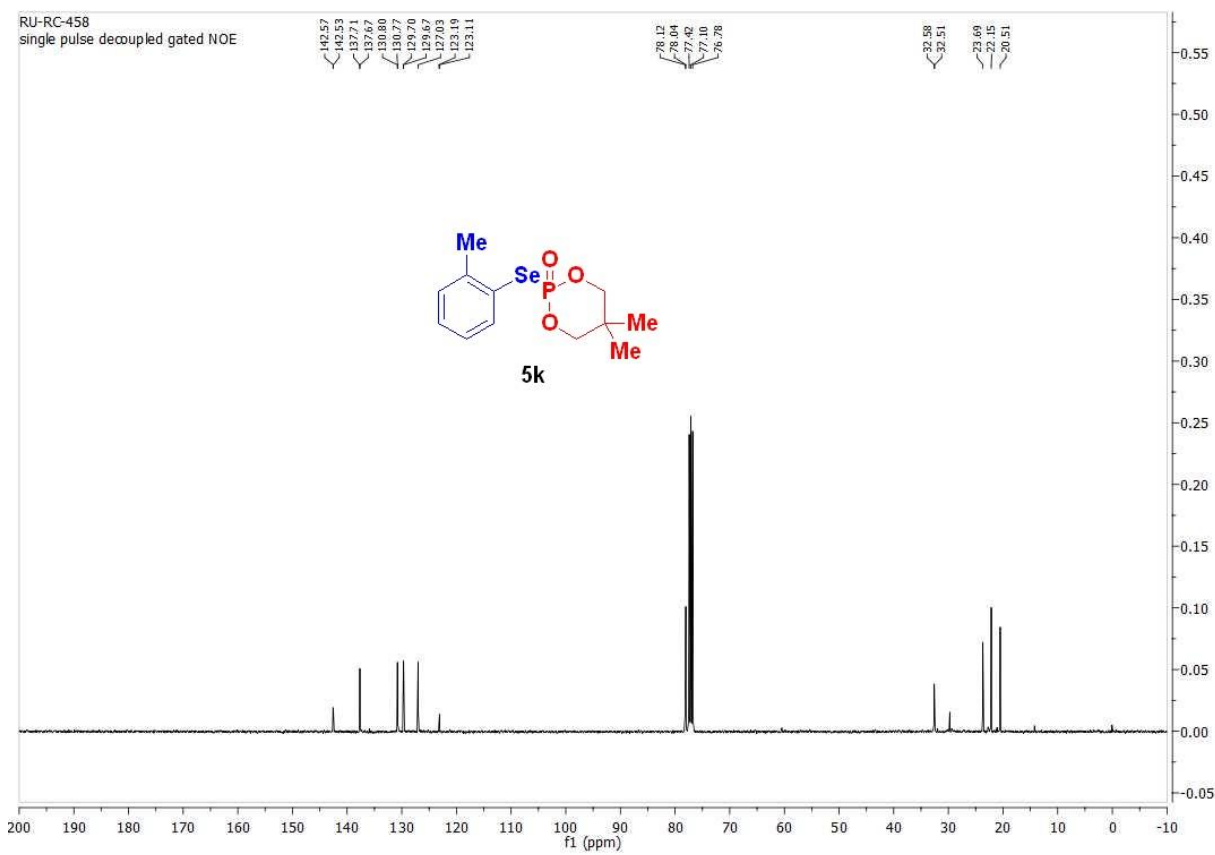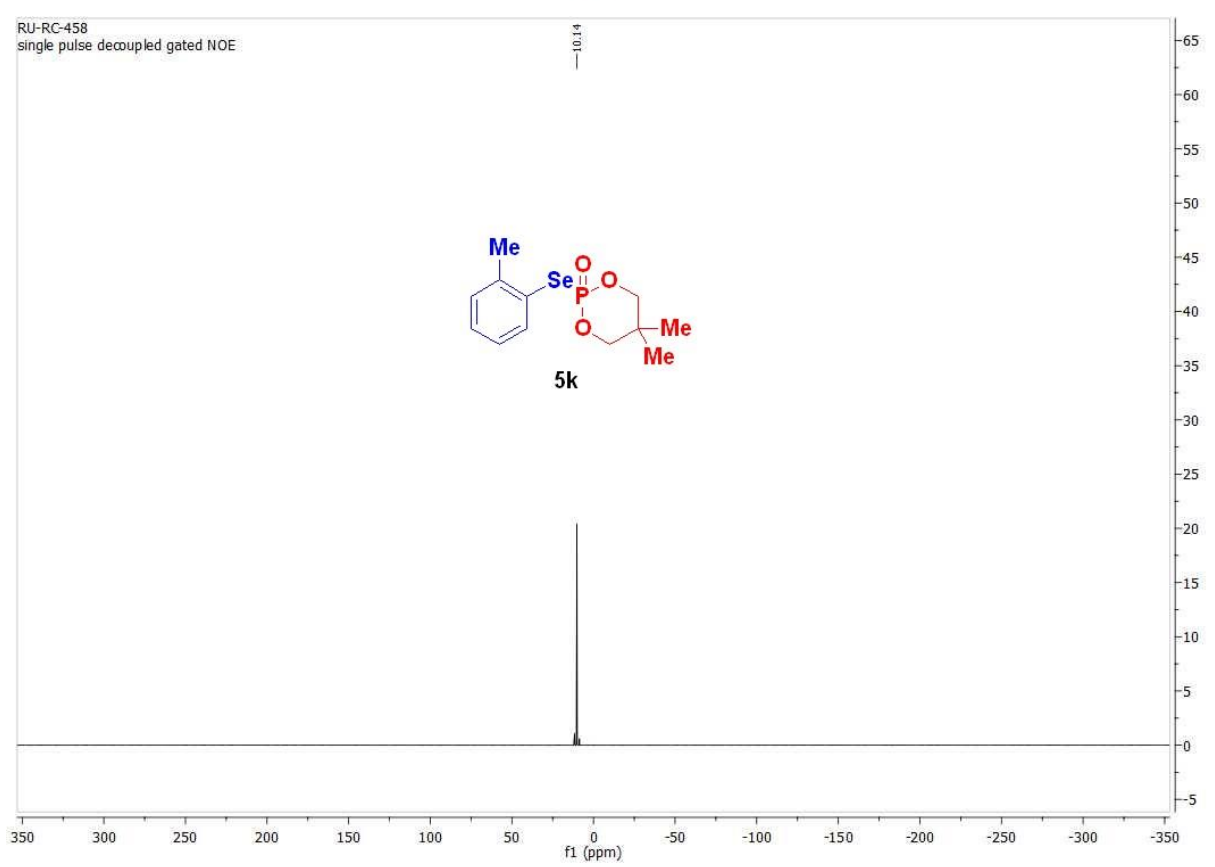

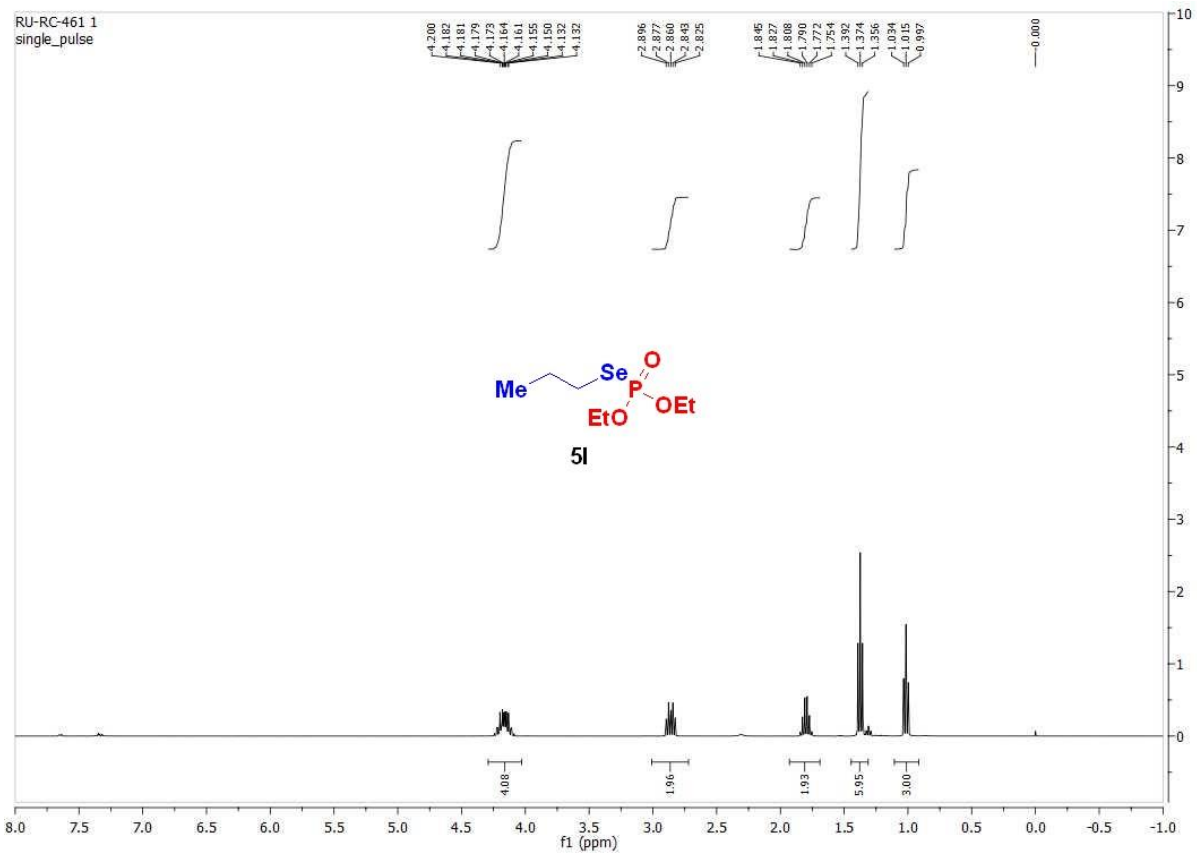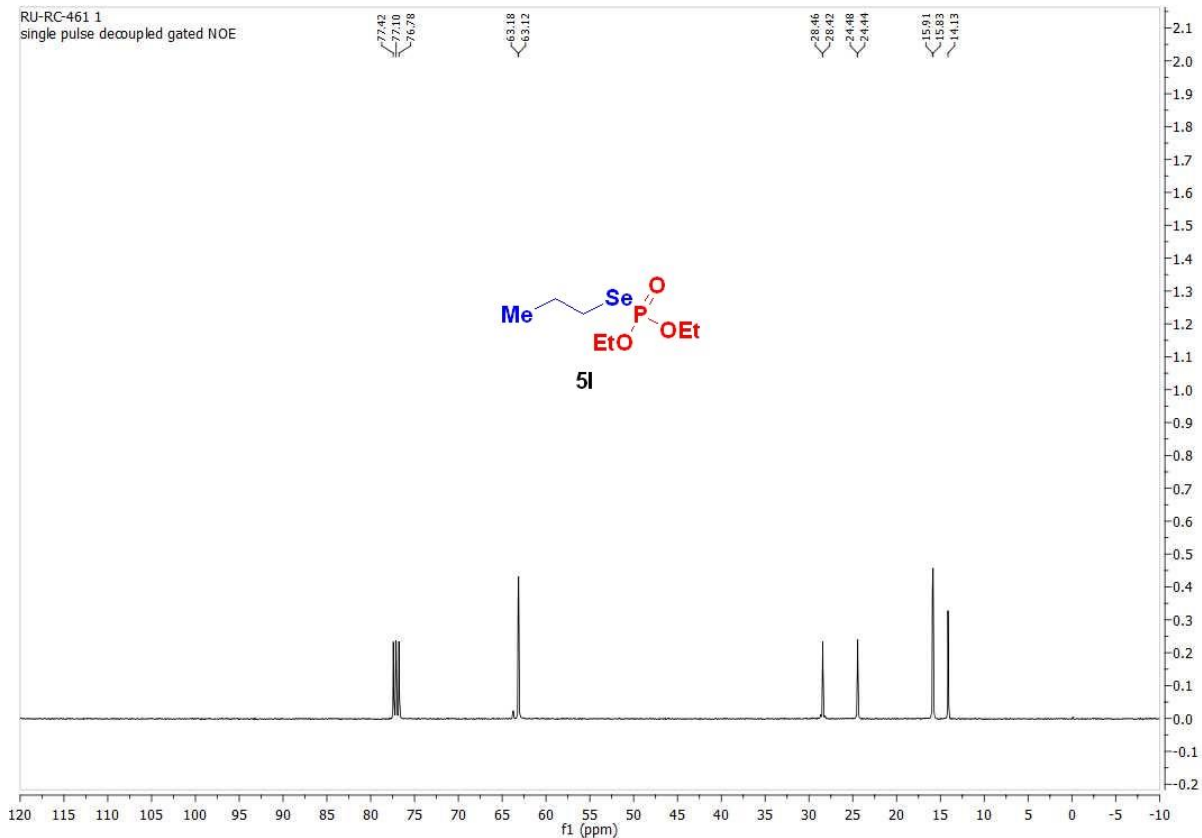

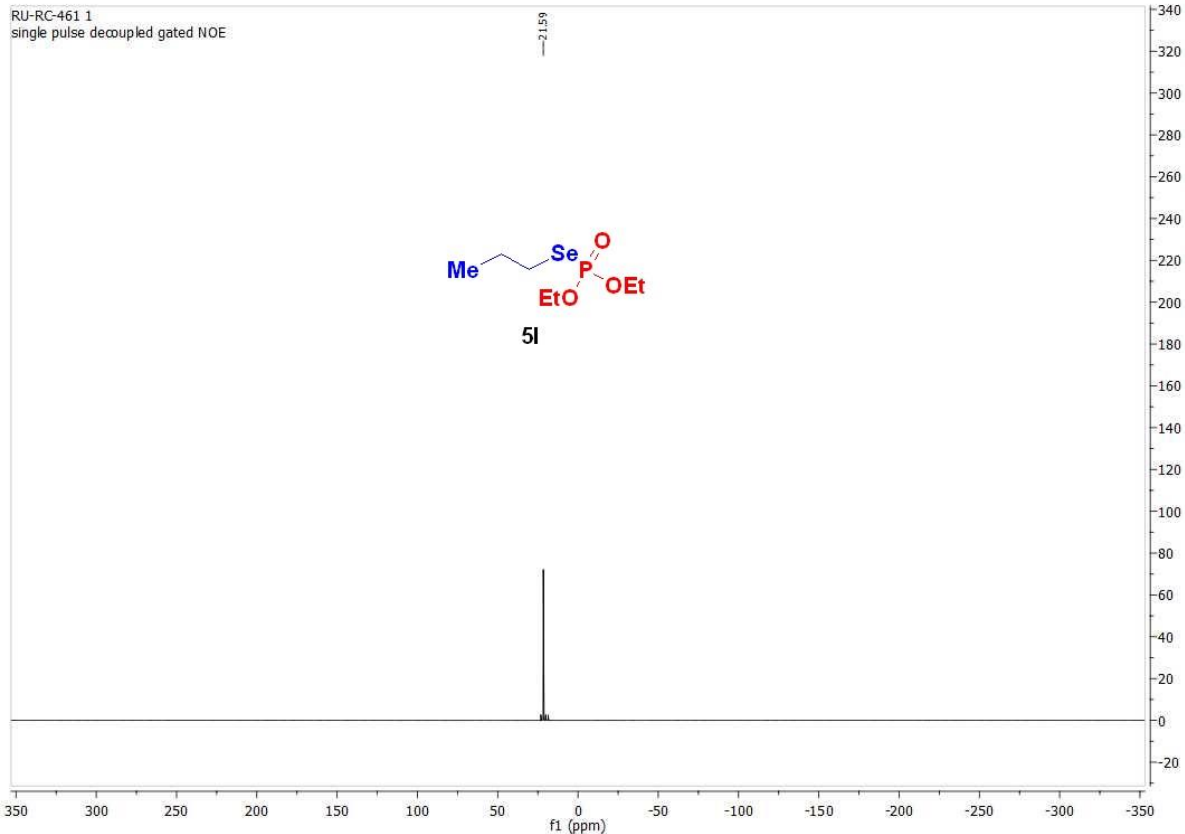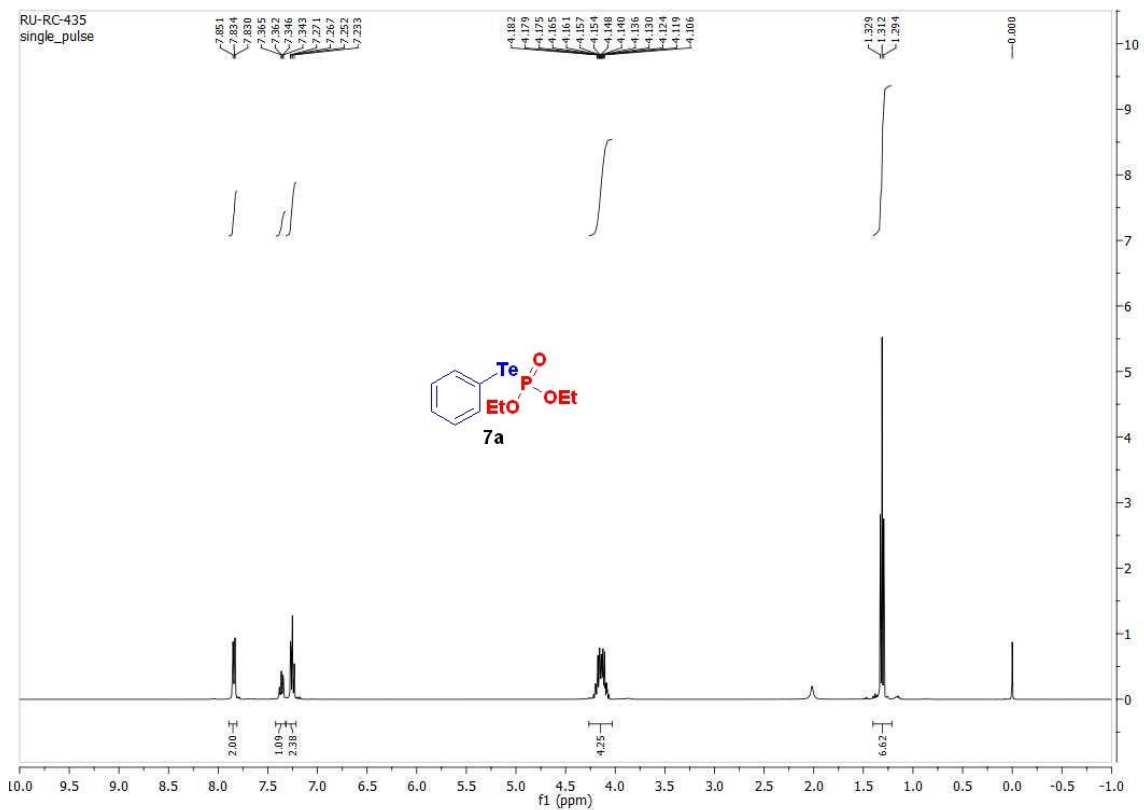

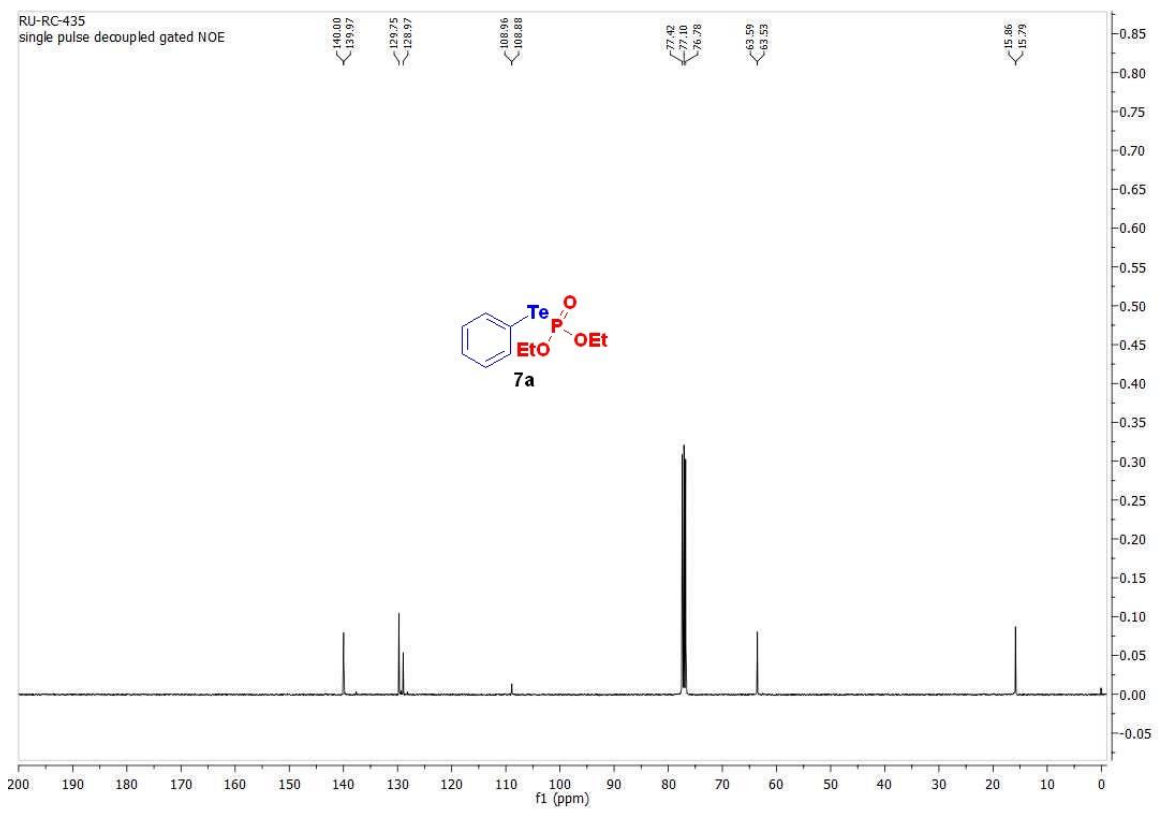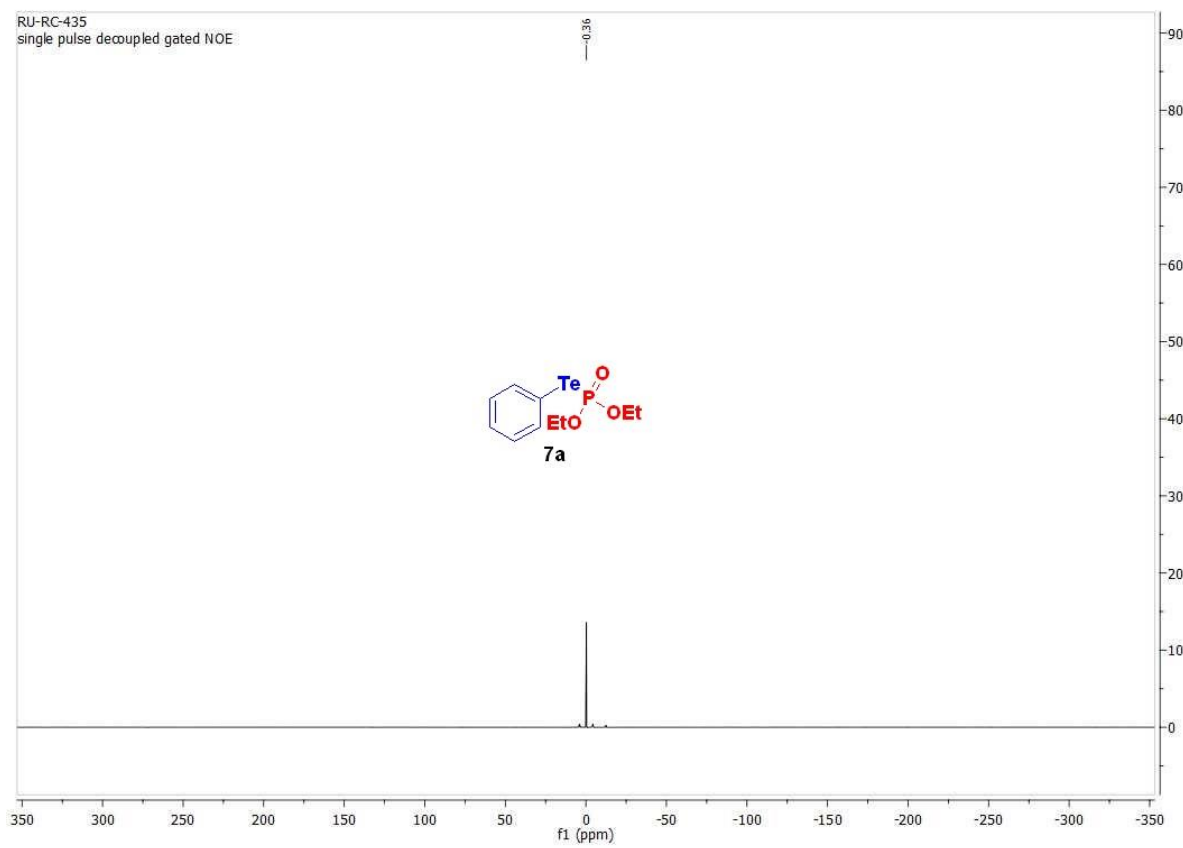

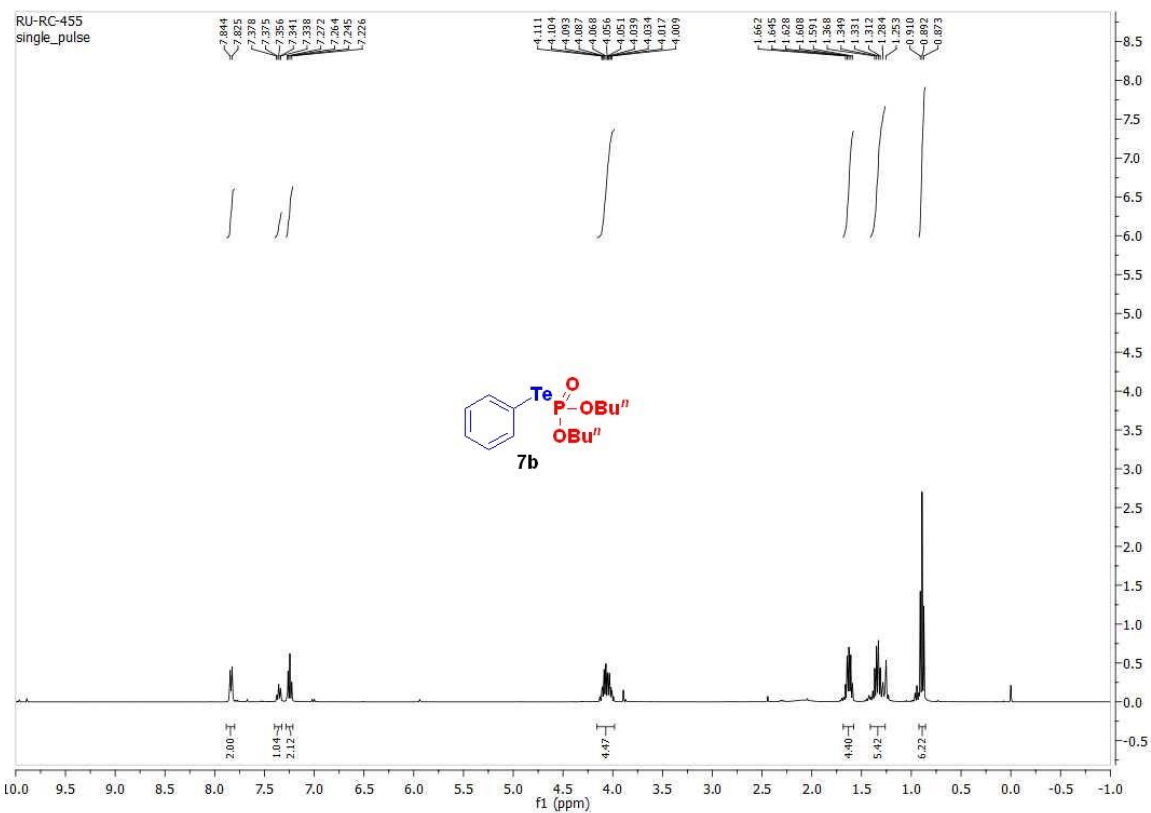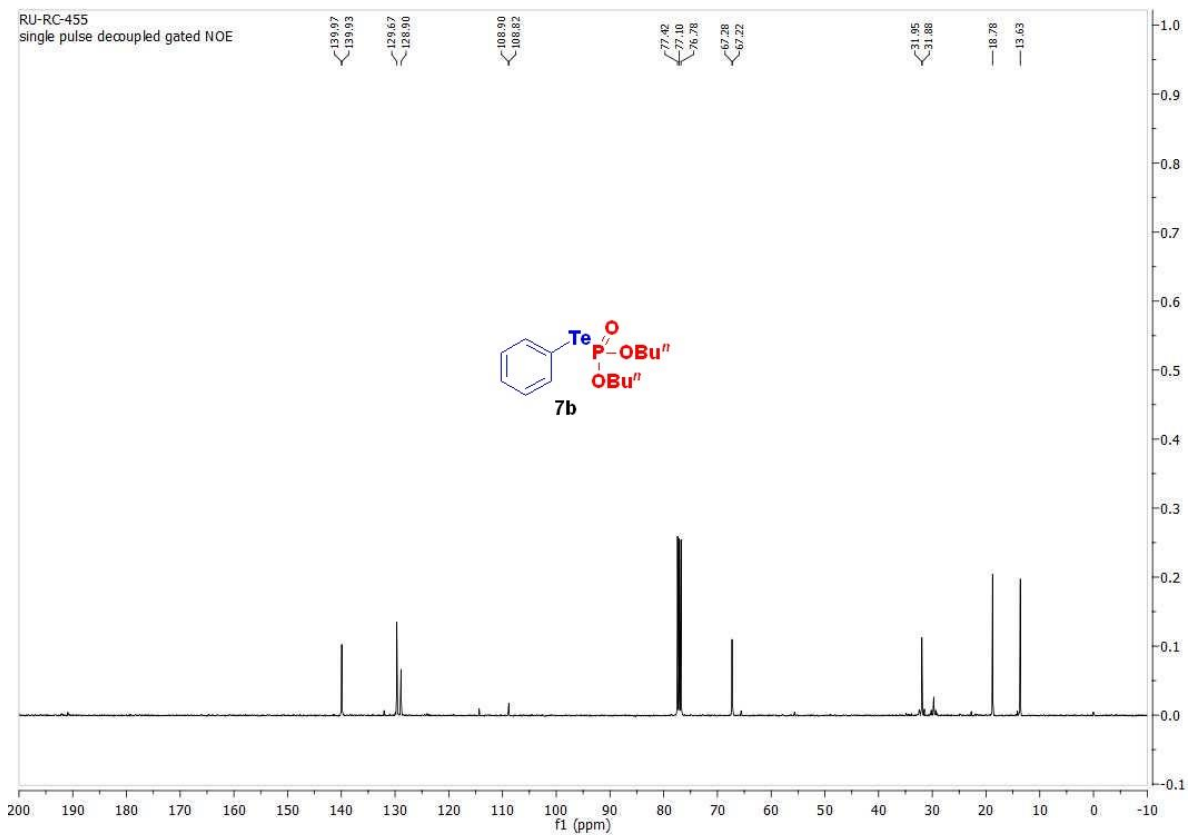

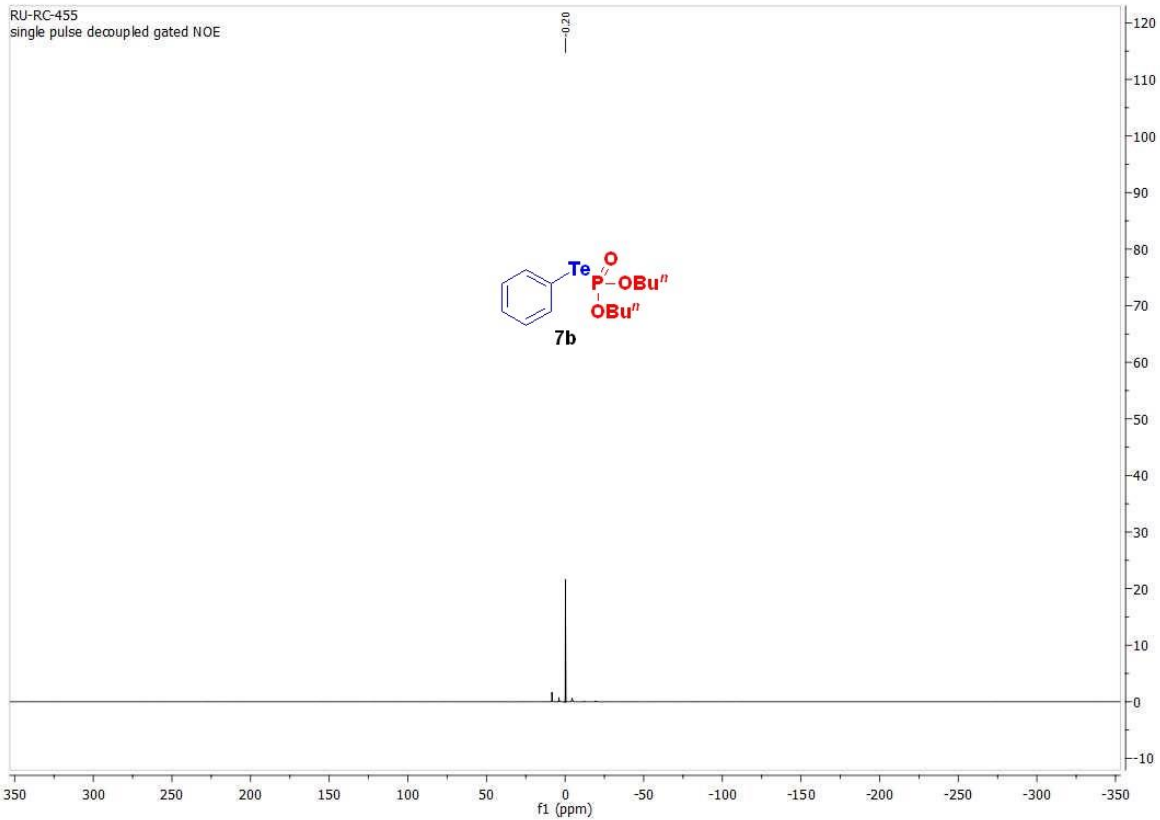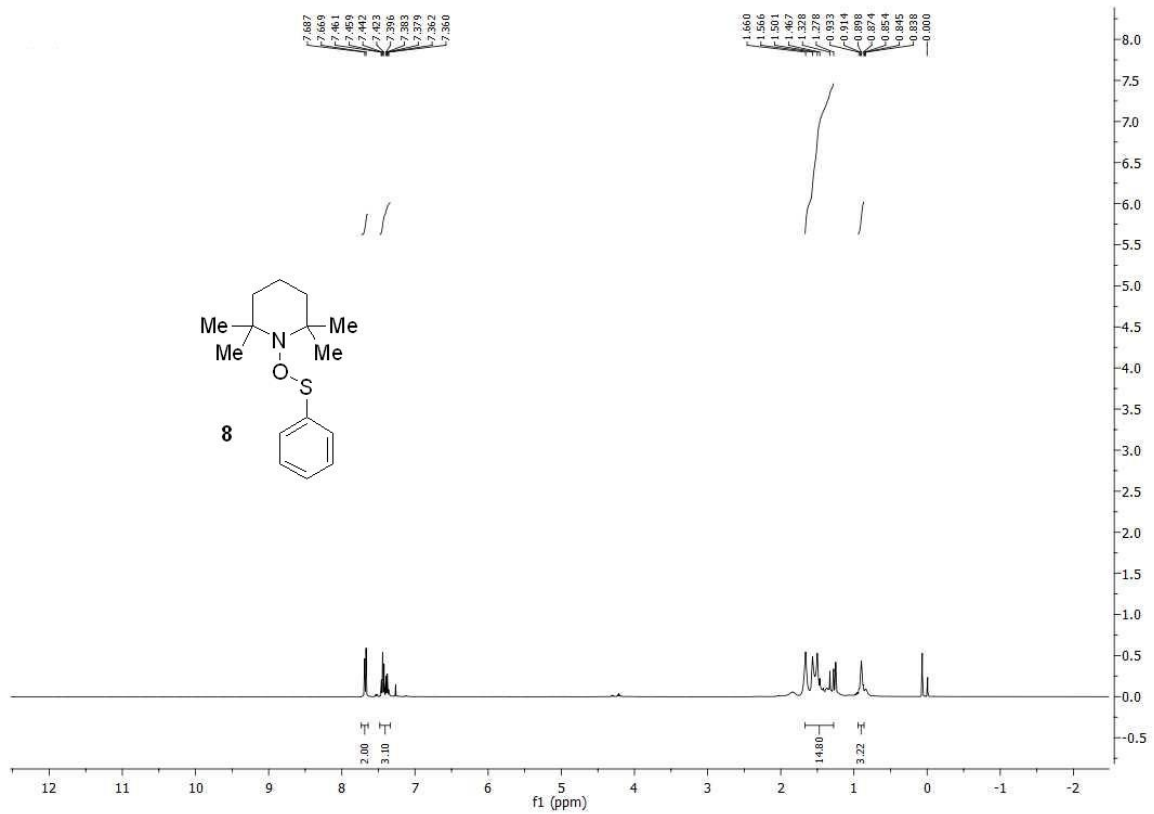



# HRMS Spectrum of compound 3g

|                               |                                        |                      |                       |
|-------------------------------|----------------------------------------|----------------------|-----------------------|
| <b>Data File</b>              | A-SB-3G.d                              | <b>Sample Name</b>   | AK-SB-3G              |
| <b>Sample Type</b>            | Sample                                 | <b>Position</b>      | P2-E1                 |
| <b>Instrument Name</b>        | Instrument 1                           | <b>User Name</b>     |                       |
| <b>Acq Method</b>             | ACN_H2O_40_60_esi_positive_bintu3min.m | <b>Acquired Time</b> | 10/1/2019 11:51:01 AM |
| <b>IRM Calibration Status</b> | Success                                | <b>DA Method</b>     | PROCESSNEW.m          |
| <b>Comment</b>                |                                        |                      |                       |

|                     |      |                       |                             |
|---------------------|------|-----------------------|-----------------------------|
| <b>Sample Group</b> |      | <b>Info.</b>          |                             |
| <b>Stream Name</b>  | LC 1 | <b>Acquisition SW</b> | 6200 series TOF/6500 series |
|                     |      | <b>Version</b>        | Q-TOF B.06.01 (B6172 SP1)   |

## Compound Table

| Compound Label        | RT    | Mass     | Abund | Formula   | Tgt Mass | Diff (ppm) |
|-----------------------|-------|----------|-------|-----------|----------|------------|
| Cpd 1: 0.185 331.2842 | 0.185 | 338.0894 | 49401 | C20H19OPS | 338.0894 | 0.07       |

| Compound Label        | m/z      | RT    | Algorithm       | Mass     |
|-----------------------|----------|-------|-----------------|----------|
| Cpd 1: 0.185 331.2842 | 339.0967 | 0.185 | Find By Formula | 338.0894 |

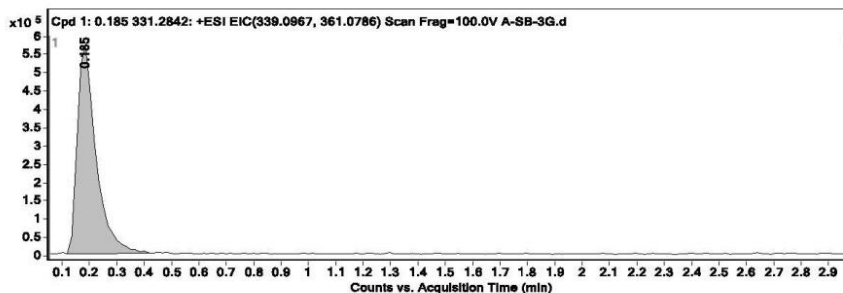

## MS Zoomed Spectrum

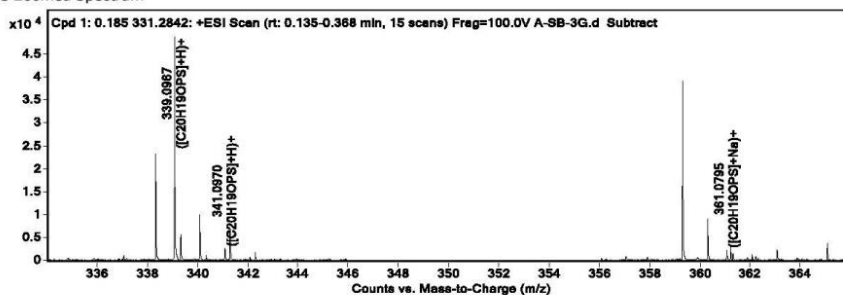

## MS Spectrum Peak List

| m/z      | Calc m/z | Diff(ppm) | z | Abund    | Formula   | Ion     |
|----------|----------|-----------|---|----------|-----------|---------|
| 339.0967 | 339.0967 | 0.03      | 1 | 49400.85 | C20H19OPS | (M+H)+  |
| 340.0998 | 340.0999 | 0.46      | 1 | 10096.57 | C20H19OPS | (M+H)+  |
| 341.097  | 341.0964 | -1.82     | 1 | 2575.77  | C20H19OPS | (M+H)+  |
| 361.0795 | 361.0786 | -2.3      | 1 | 2283.12  | C20H19OPS | (M+Na)+ |

Instrument Info : Agilent Technologies 6545 Q-TOF LC/MS

# HRMS Spectrum of compound 3h

**Data File** AK-SB-3h.d **Sample Name** AK-SB-3h  
**Sample Type** Sample **Position** P2-E2  
**Instrument Name** Instrument 1 **User Name**  
**Acq Method** ACN\_H2O\_40\_60\_esi\_positive\_bintu3min.m **Acquired Time** 10/1/2019 11:59:21 AM  
**IRM Calibration Status** Success **DA Method** PROCESSNEW.m  
**Comment**

**Sample Group**  
**Stream Name** LC 1 **Info.**  
**Acquisition SW** 6200 series TOF/6500 series  
**Version** Q-TOF B.06.01 (B6172 SP1)

## Compound Table

| Compound Label        | RT    | Mass     | Abund | Formula     | Tgt Mass | Diff (ppm) |
|-----------------------|-------|----------|-------|-------------|----------|------------|
| Cpd 1: 0.172 247.0880 | 0.172 | 416.0001 | 6528  | C20H18BrOPS | 415.9999 | 0.48       |

| Compound Label        | m/z      | RT    | Algorithm       | Mass     |
|-----------------------|----------|-------|-----------------|----------|
| Cpd 1: 0.172 247.0880 | 417.0073 | 0.172 | Find By Formula | 416.0001 |

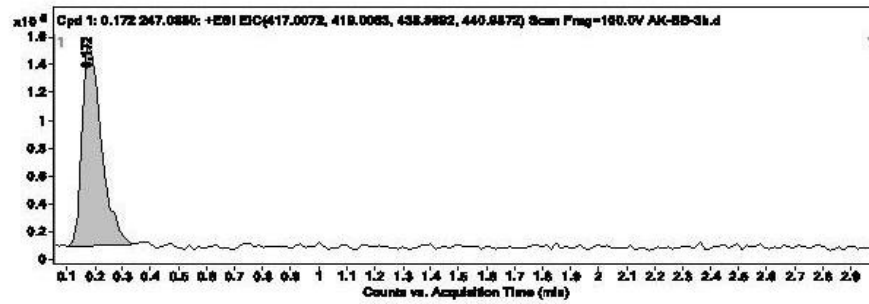

## MS Zoomed Spectrum

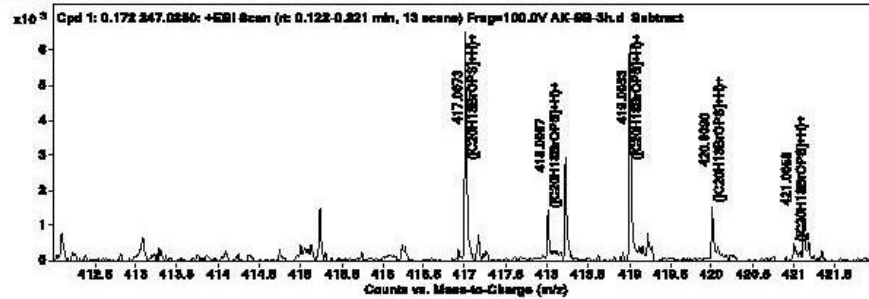

## MS Spectrum Peak List

| m/z      | Calc m/z | Diff(ppm) | z | Abund   | Formula     | Ion    |
|----------|----------|-----------|---|---------|-------------|--------|
| 417.0073 | 417.0072 | -0.29     | 1 | 6527.71 | C20H18BrOPS | (M+H)+ |
| 418.0097 | 418.0105 | 1.7       | 1 | 1440.15 | C20H18BrOPS | (M+H)+ |
| 419.0053 | 419.0053 | -0.14     | 1 | 6302.2  | C20H18BrOPS | (M+H)+ |
| 420.0099 | 420.0084 | -1.38     | 1 | 1599.37 | C20H18BrOPS | (M+H)+ |
| 421.0058 | 421.005  | -1.87     | 1 | 482.77  | C20H18BrOPS | (M+H)+ |
| 422.0216 | 422.0062 | -36.49    | 1 | 119.72  | C20H18BrOPS | (M+H)+ |

Instrument Info : Agilent Technologies 6545 Q-TOF LC/MS

# HRMS Spectrum of compound 3i

|                               |                                        |                      |                       |
|-------------------------------|----------------------------------------|----------------------|-----------------------|
| <b>Data File</b>              | AK-SB-3i.d                             | <b>Sample Name</b>   | AK-SB-3i              |
| <b>Sample Type</b>            | Sample                                 | <b>Position</b>      | P2-E3                 |
| <b>Instrument Name</b>        | Instrument 1                           | <b>User Name</b>     |                       |
| <b>Acq Method</b>             | ACN_H2O_40_60_esi_positive_bintu3min.m | <b>Acquired Time</b> | 10/1/2019 12:07:40 PM |
| <b>IRM Calibration Status</b> | Success                                | <b>DA Method</b>     | PROCESSNEW.m          |
| <b>Comment</b>                |                                        |                      |                       |

|                     |      |                               |                                                        |
|---------------------|------|-------------------------------|--------------------------------------------------------|
| <b>Sample Group</b> |      | <b>Info.</b>                  |                                                        |
| <b>Stream Name</b>  | LC 1 | <b>Acquisition SW Version</b> | 6200 series TOF/6 500 series Q-TOF B.06.01 (B6172 SP1) |

## Compound Table

| Compound Label        | RT    | Mass     | Abund | Formula          | Tgt Mass | Diff (ppm) |
|-----------------------|-------|----------|-------|------------------|----------|------------|
| Cpd 1: 0.183 373.0584 | 0.183 | 372.0511 | 6557  | C20 H18 Cl O P S | 372.0505 | 1.68       |

| Compound Label        | m/z      | RT    | Algorithm       | Mass     |
|-----------------------|----------|-------|-----------------|----------|
| Cpd 1: 0.183 373.0584 | 395.0398 | 0.183 | Find By Formula | 372.0511 |

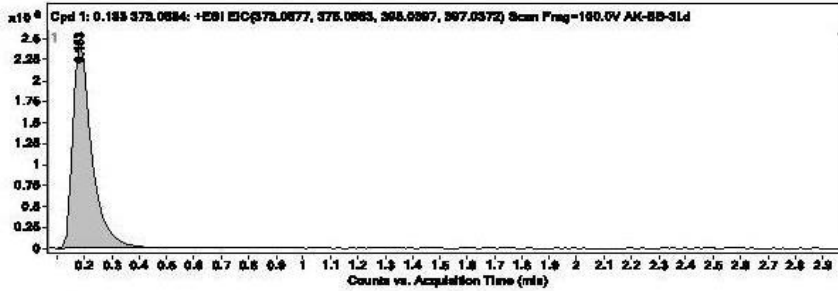

## MS Zoomed Spectrum

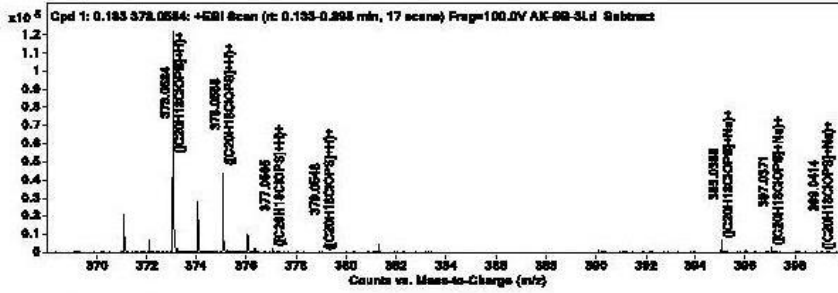

## MS Spectrum Peak List

| m/z      | Calc m/z | Diff(ppm) | z | Abund     | Formula     | Ion     |
|----------|----------|-----------|---|-----------|-------------|---------|
| 373.0584 | 373.0577 | -1.76     | 1 | 124382.36 | C20H18ClOPS | (M+H)+  |
| 374.0616 | 374.061  | -1.79     | 1 | 28376.43  | C20H18ClOPS | (M+H)+  |
| 375.0558 | 375.0553 | -1.5      | 1 | 47022.79  | C20H18ClOPS | (M+H)+  |
| 376.0588 | 376.0581 | -1.88     | 1 | 10409.05  | C20H18ClOPS | (M+H)+  |
| 377.0565 | 377.0548 | -4.32     | 1 | 2150.7    | C20H18ClOPS | (M+H)+  |
| 378.0594 | 378.056  | -9.07     | 1 | 465.74    | C20H18ClOPS | (M+H)+  |
| 379.0548 | 379.0576 | 7.49      | 1 | 131.61    | C20H18ClOPS | (M+H)+  |
| 395.0398 | 395.0397 | -0.28     | 1 | 6556.57   | C20H18ClOPS | (M+Na)+ |
| 396.0432 | 396.0429 | -0.63     | 1 | 1380.1    | C20H18ClOPS | (M+Na)+ |
| 397.0371 | 397.0372 | 0.23      | 1 | 2724.51   | C20H18ClOPS | (M+Na)+ |
| 398.0386 | 398.0401 | 3.56      | 1 | 589.86    | C20H18ClOPS | (M+Na)+ |
| 399.0414 | 399.0368 | -11.64    | 1 | 209.21    | C20H18ClOPS | (M+Na)+ |

Instrument Info : Agilent Technologies 6545 Q-TOF LC/MS

# HRMS Spectrum of compound 3k

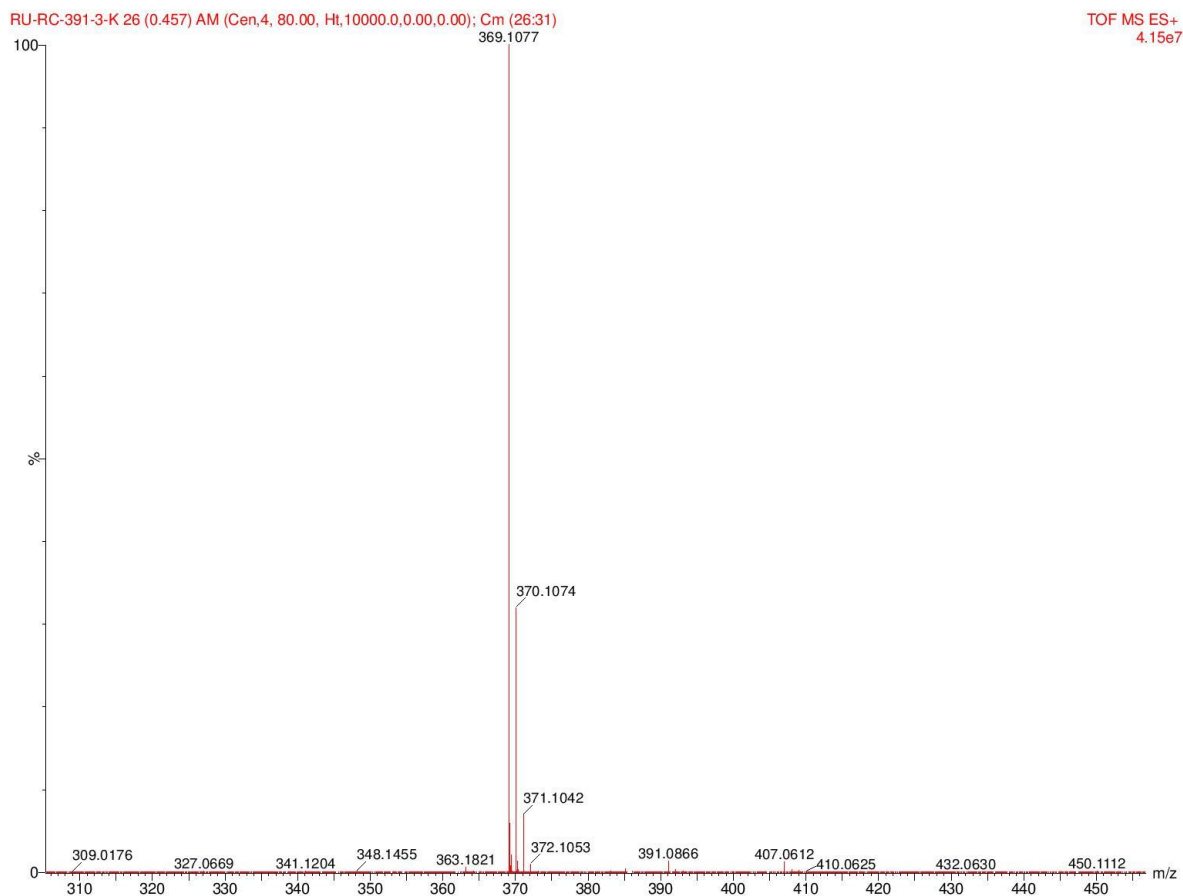

# HRMS Spectrum of compound 3l

|                        |                                        |               |                       |
|------------------------|----------------------------------------|---------------|-----------------------|
| Data File              | AK-SB-3l.d                             | Sample Name   | AK-SB-3l              |
| Sample Type            | Sample                                 | Position      | P2-E5                 |
| Instrument Name        | Instrument 1                           | User Name     |                       |
| Acq Method             | ACN_H2O_40_60_esi_positive_bintu3min.m | Acquired Time | 10/1/2019 12:24:20 PM |
| IRM Calibration Status | Success                                | DA Method     | PROCESSNEW.m          |
| Comment                |                                        |               |                       |

|              |      |                |                             |
|--------------|------|----------------|-----------------------------|
| Sample Group |      | Info.          |                             |
| Stream Name  | LC 1 | Acquisition SW | 6200 series TOF/6500 series |
|              |      | Version        | Q-TOF B.06.01 (B6172 SP1)   |

### Compound Table

| Compound Label        | RT    | Mass     | Abund | Formula      | Tgt Mass | Diff (ppm) |
|-----------------------|-------|----------|-------|--------------|----------|------------|
| Cpd 1: 0.188 367.1275 | 0.188 | 366.1203 | 18023 | C22 H23 O PS | 366.1207 | -1.21      |

| Compound Label        | m/z      | RT    | Algorithm       | Mass     |
|-----------------------|----------|-------|-----------------|----------|
| Cpd 1: 0.188 367.1275 | 389.1095 | 0.188 | Find By Formula | 366.1203 |

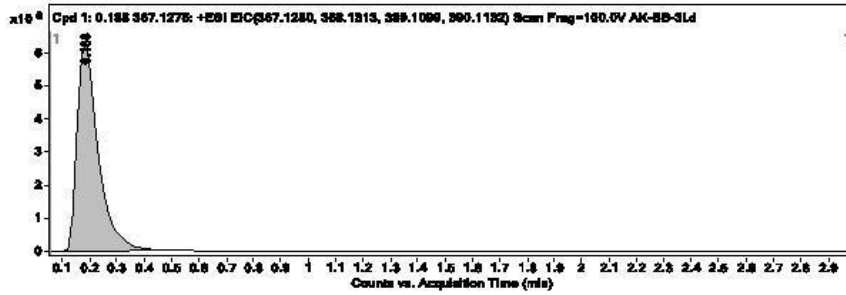

### MS Zoomed Spectrum

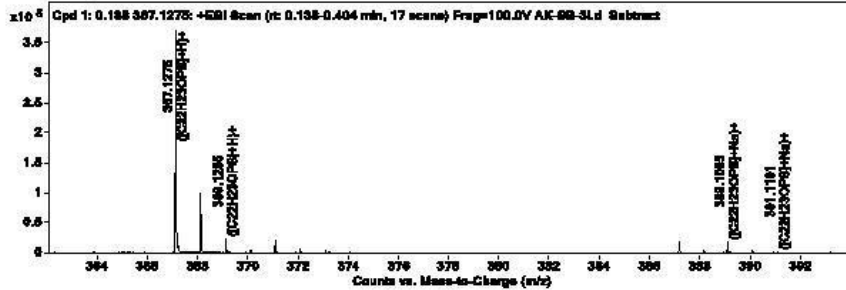

### MS Spectrum Peak List

| m/z      | Calc m/z | Diff(ppm) | z | Abund     | Formula   | Ion     |
|----------|----------|-----------|---|-----------|-----------|---------|
| 367.1275 | 367.128  | 1.29      | 1 | 389170.92 | C22H23OPS | (M+H)+  |
| 368.1308 | 368.1313 | 1.32      | 1 | 100243.58 | C22H23OPS | (M+H)+  |
| 369.1285 | 369.1282 | -0.9      | 1 | 23661.2   | C22H23OPS | (M+H)+  |
| 389.1095 | 389.1099 | 1.18      | 1 | 18022.98  | C22H23OPS | (M+Na)+ |
| 390.1123 | 390.1132 | 2.22      | 1 | 4689.46   | C22H23OPS | (M+Na)+ |
| 391.1101 | 391.1101 | 0.16      | 1 | 1473.28   | C22H23OPS | (M+Na)+ |

Instrument Info : Agilent Technologies 6545 Q-TOF LC/MS

# HRMS Spectrum of compound 3m

|                               |                                        |                      |                       |
|-------------------------------|----------------------------------------|----------------------|-----------------------|
| <b>Data File</b>              | AK-SB-3m.d                             | <b>Sample Name</b>   | AK-SB-3m              |
| <b>Sample Type</b>            | Sample                                 | <b>Position</b>      | P2-E6                 |
| <b>Instrument Name</b>        | Instrument 1                           | <b>User Name</b>     |                       |
| <b>Acq Method</b>             | ACN_H2O_40_60_esi_positive_bintu3min.m | <b>Acquired Time</b> | 10/1/2019 12:32:36 PM |
| <b>IRM Calibration Status</b> | Success                                | <b>DA Method</b>     | PROCESSNEW.m          |
| <b>Comment</b>                |                                        |                      |                       |

|                     |      |                               |                                                       |
|---------------------|------|-------------------------------|-------------------------------------------------------|
| <b>Sample Group</b> |      | <b>Info.</b>                  |                                                       |
| <b>Stream Name</b>  | LC 1 | <b>Acquisition SW Version</b> | 6200 series TOF/6500 series Q-TOF B.06.01 (B6172 SP1) |

## Compound Table

| Compound Label       | RT    | Mass     | Abund | Formula          | Tgt Mass | Diff (ppm) |
|----------------------|-------|----------|-------|------------------|----------|------------|
| Cpd 1: 2.141 73.0604 | 2.141 | 444.0328 | 113   | C22 H22 Br O P S | 444.0312 | 3.43       |

| Compound Label       | m/z      | RT    | Algorithm       | Mass     |
|----------------------|----------|-------|-----------------|----------|
| Cpd 1: 2.141 73.0604 | 469.0201 | 2.141 | Find By Formula | 444.0328 |

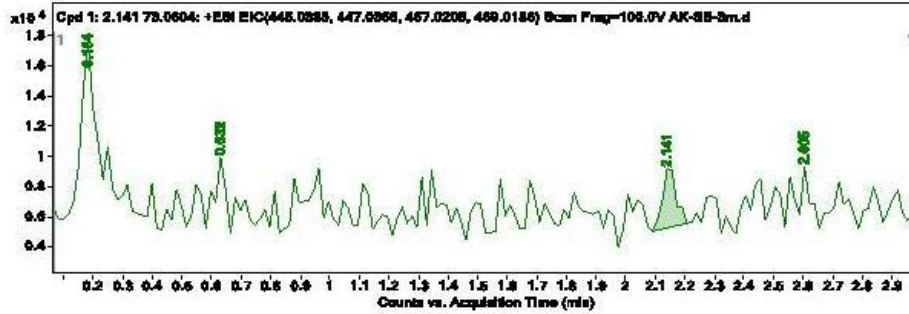

## MS Zoomed Spectrum

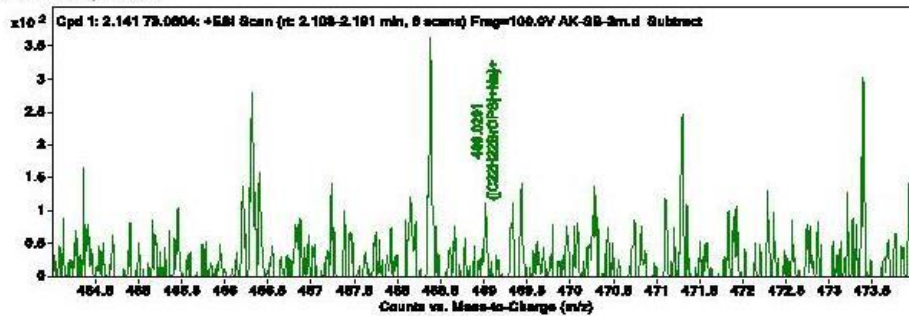

## MS Spectrum Peak List

| m/z      | Calc m/z | Diff(ppm) | z | Abund  | Formula     | Ion     |
|----------|----------|-----------|---|--------|-------------|---------|
| 469.0201 | 469.0186 | -3.24     | 1 | 112.52 | C22H22BrOPS | (M+Na)+ |

Instrument Info : Agilent Technologies 6545 Q-TOF LC/MS

# HRMS Spectrum of compound 3n

|                               |                                        |                      |                       |
|-------------------------------|----------------------------------------|----------------------|-----------------------|
| <b>Data File</b>              | AK-SB-3n.d                             | <b>Sample Name</b>   | AK-SB-3n              |
| <b>Sample Type</b>            | Sample                                 | <b>Position</b>      | P2-E7                 |
| <b>Instrument Name</b>        | Instrument 1                           | <b>User Name</b>     |                       |
| <b>Acq Method</b>             | ACN_H2O_40_60_esi_positive_bintu3min.m | <b>Acquired Time</b> | 10/1/2019 12:40:52 PM |
| <b>IRM Calibration Status</b> | Success                                | <b>DA Method</b>     | PROCESSNEW.m          |
| <b>Comment</b>                |                                        |                      |                       |

|                     |      |                               |                                                          |
|---------------------|------|-------------------------------|----------------------------------------------------------|
| <b>Sample Group</b> |      | <b>Info.</b>                  |                                                          |
| <b>Stream Name</b>  | LC 1 | <b>Acquisition SW Version</b> | 6200 series TOF/6500 series<br>Q-TOF B.06.01 (B6172 SP1) |

## Compound Table

| Compound Label        | RT    | Mass     | Abund | Formula          | Tgt Mass | Diff (ppm) |
|-----------------------|-------|----------|-------|------------------|----------|------------|
| Cpd 1: 0.193 331.2835 | 0.193 | 444.0306 | 819   | C22 H22 Br O P S | 444.0312 | -1.34      |

| Compound Label        | m/z      | RT    | Algorithm       | Mass     |
|-----------------------|----------|-------|-----------------|----------|
| Cpd 1: 0.193 331.2835 | 445.0372 | 0.193 | Find By Formula | 444.0306 |

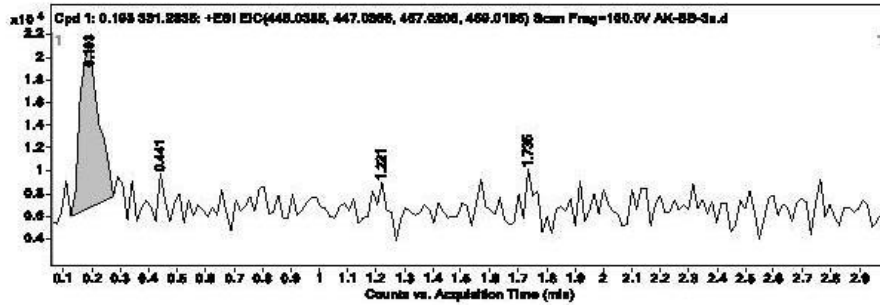

## MS Zoomed Spectrum

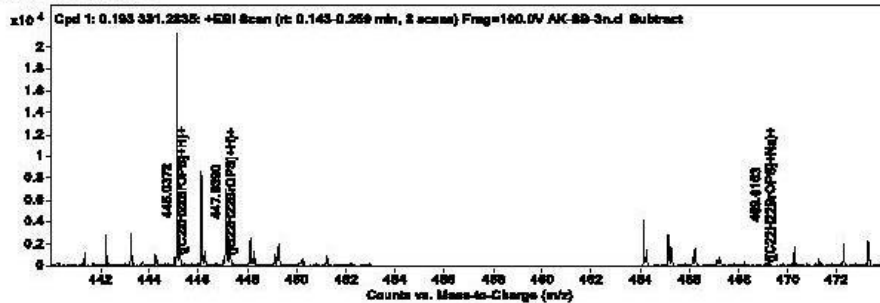

## MS Spectrum Peak List

| m/z      | Calc m/z | Diff(ppm) | z | Abund  | Formula     | Ion                 |
|----------|----------|-----------|---|--------|-------------|---------------------|
| 445.0372 | 445.0385 | 2.85      | 1 | 819.46 | C22H22BrOPS | (M+H) <sup>+</sup>  |
| 446.0377 | 446.0418 | 9.13      | 1 | 271.35 | C22H22BrOPS | (M+H) <sup>+</sup>  |
| 447.039  | 447.0366 | -5.24     | 1 | 724.77 | C22H22BrOPS | (M+H) <sup>+</sup>  |
| 448.0376 | 448.0397 | 4.65      | 1 | 214.35 | C22H22BrOPS | (M+H) <sup>+</sup>  |
| 469.0163 | 469.0186 | 4.93      | 1 | 116.83 | C22H22BrOPS | (M+Na) <sup>+</sup> |
| 470.0181 | 470.0217 | 7.62      | 1 | 36.91  | C22H22BrOPS | (M+Na) <sup>+</sup> |

Instrument Info : Agilent Technologies 6545 Q-TOF LC/MS

# HRMS Spectrum of compound 3o

|                               |                                        |                      |                       |
|-------------------------------|----------------------------------------|----------------------|-----------------------|
| <b>Data File</b>              | AK-SB-3o.d                             | <b>Sample Name</b>   | AK-SB-3o              |
| <b>Sample Type</b>            | Sample                                 | <b>Position</b>      | P2-E8                 |
| <b>Instrument Name</b>        | Instrument 1                           | <b>User Name</b>     |                       |
| <b>Acq Method</b>             | ACN_H2O_40_60_esi_positive_bintu3min.m | <b>Acquired Time</b> | 10/1/2019 12:49:08 PM |
| <b>IRM Calibration Status</b> | Success                                | <b>DA Method</b>     | PROCESSNEW.m          |
| <b>Comment</b>                |                                        |                      |                       |

|                     |      |                       |                             |
|---------------------|------|-----------------------|-----------------------------|
| <b>Sample Group</b> |      | <b>Info.</b>          |                             |
| <b>Stream Name</b>  | LC 1 | <b>Acquisition SW</b> | 6200 series TOF/6500 series |
|                     |      | <b>Version</b>        | Q-TOF B.06.01 (B6172 SP1)   |

## Compound Table

| Compound Label       | RT    | Mass     | Abund | Formula          | Tgt Mass | Diff (ppm) |
|----------------------|-------|----------|-------|------------------|----------|------------|
| Cpd 1: 0.183 98.0142 | 0.183 | 444.0311 | 18368 | C22 H22 Br O P S | 444.0312 | -0.21      |

| Compound Label       | m/z      | RT    | Algorithm       | Mass     |
|----------------------|----------|-------|-----------------|----------|
| Cpd 1: 0.183 98.0142 | 447.0365 | 0.183 | Find By Formula | 444.0311 |

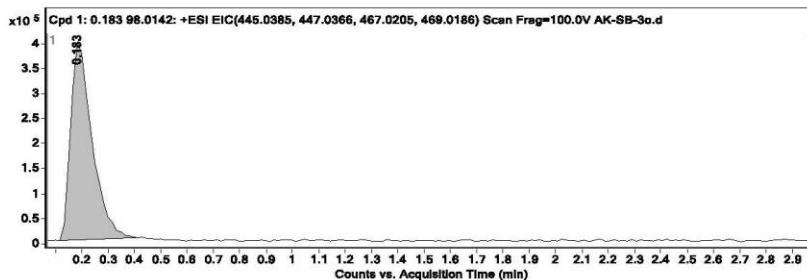

## MS Zoomed Spectrum

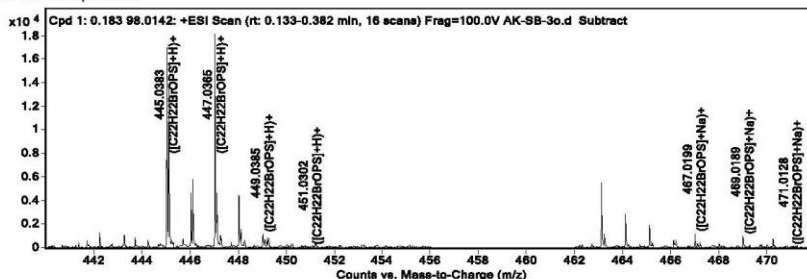

## MS Spectrum Peak List

| m/z      | Calc m/z | Diff(ppm) | z | Abund    | Formula     | Ion     |
|----------|----------|-----------|---|----------|-------------|---------|
| 445.0383 | 445.0385 | 0.46      | 1 | 17810.47 | C22H22BrOPS | (M+H)+  |
| 446.0419 | 446.0418 | -0.22     | 1 | 4653.61  | C22H22BrOPS | (M+H)+  |
| 447.0365 | 447.0366 | 0.31      | 1 | 18368.06 | C22H22BrOPS | (M+H)+  |
| 448.0398 | 448.0397 | -0.16     | 1 | 4707.37  | C22H22BrOPS | (M+H)+  |
| 449.0385 | 449.0368 | -3.9      | 1 | 1171.43  | C22H22BrOPS | (M+H)+  |
| 450.0398 | 450.0378 | -4.55     | 1 | 283.28   | C22H22BrOPS | (M+H)+  |
| 451.0302 | 451.0395 | 20.79     | 1 | 95.73    | C22H22BrOPS | (M+H)+  |
| 467.0199 | 467.0205 | 1.15      | 1 | 1213.25  | C22H22BrOPS | (M+Na)+ |
| 468.0239 | 468.0237 | -0.47     | 1 | 355.45   | C22H22BrOPS | (M+Na)+ |
| 469.0189 | 469.0186 | -0.7      | 1 | 996.16   | C22H22BrOPS | (M+Na)+ |
| 470.0215 | 470.0217 | 0.27      | 1 | 263.53   | C22H22BrOPS | (M+Na)+ |
| 471.0128 | 471.0187 | 12.55     | 1 | 99.4     | C22H22BrOPS | (M+Na)+ |

Instrument Info : Agilent Technologies 6545 Q-TOF LC/MS



# HRMS Spectrum of compound 3p

|                               |                                        |                      |                       |
|-------------------------------|----------------------------------------|----------------------|-----------------------|
| <b>Data File</b>              | AK-SB-3p.d                             | <b>Sample Name</b>   | AK-SB-3p              |
| <b>Sample Type</b>            | Sample                                 | <b>Position</b>      | P2-E9                 |
| <b>Instrument Name</b>        | Instrument 1                           | <b>User Name</b>     |                       |
| <b>Acq Method</b>             | ACN_H2O_40_60_esi_positive_bintu3min.m | <b>Acquired Time</b> | 10/1/2019 12:57:30 PM |
| <b>IRM Calibration Status</b> | Success                                | <b>DA Method</b>     | PROCESSNEW.m          |
| <b>Comment</b>                |                                        |                      |                       |

|                     |      |                               |                                                       |
|---------------------|------|-------------------------------|-------------------------------------------------------|
| <b>Sample Group</b> |      | <b>Info.</b>                  |                                                       |
| <b>Stream Name</b>  | LC 1 | <b>Acquisition SW Version</b> | 6200 series TOF/6500 series Q-TOF B.06.01 (B6172 SP1) |

## Compound Table

| Compound Label       | RT    | Mass     | Abund | Formula          | Tgt Mass | Diff (ppm) |
|----------------------|-------|----------|-------|------------------|----------|------------|
| Cpd 1: 0.178 98.0141 | 0.178 | 400.0815 | 2217  | C22 H22 Cl O P S | 400.0818 | -0.51      |

| Compound Label       | m/z      | RT    | Algorithm       | Mass     |
|----------------------|----------|-------|-----------------|----------|
| Cpd 1: 0.178 98.0141 | 401.0882 | 0.178 | Find By Formula | 400.0815 |

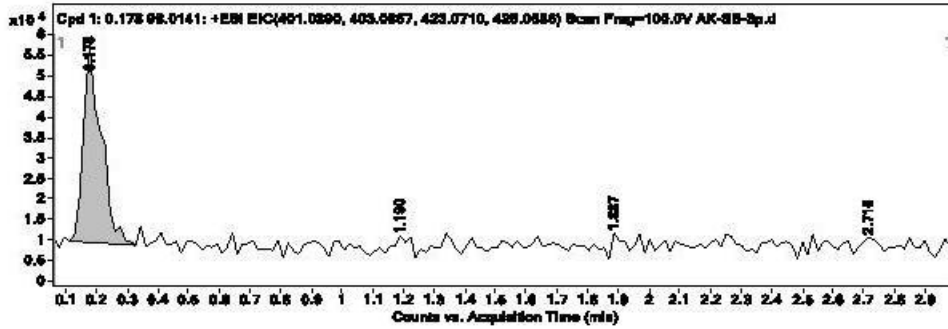

## MS Zoomed Spectrum

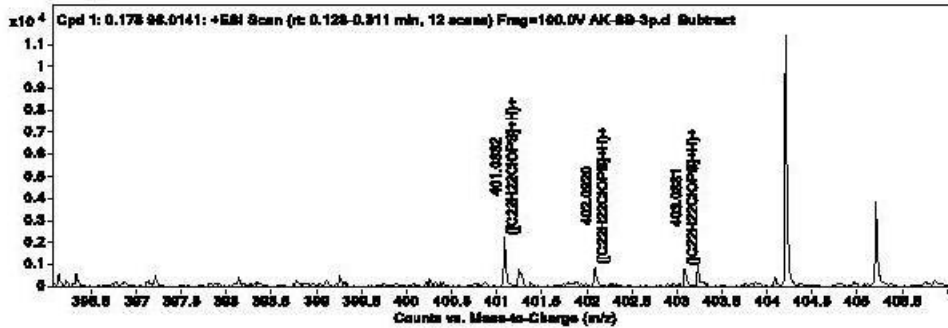

## MS Spectrum Peak List

| m/z      | Calc m/z | Diff(ppm) | z | Abund   | Formula     | Ion    |
|----------|----------|-----------|---|---------|-------------|--------|
| 401.0882 | 401.089  | 1.97      | 1 | 2217.09 | C22H22ClOPS | (M+H)+ |
| 402.092  | 402.0923 | 0.65      | 1 | 892.14  | C22H22ClOPS | (M+H)+ |
| 403.0881 | 403.0867 | -3.56     | 1 | 823.48  | C22H22ClOPS | (M+H)+ |

Instrument Info : Agilent Technologies 6545 Q-TOF LC/MS

# HRMS Spectrum of compound 3r

|                               |                                        |                      |                      |
|-------------------------------|----------------------------------------|----------------------|----------------------|
| <b>Data File</b>              | AK-SB-3r.d                             | <b>Sample Name</b>   | AK-SB-3r             |
| <b>Sample Type</b>            | Sample                                 | <b>Position</b>      | P2-E10               |
| <b>Instrument Name</b>        | Instrument 1                           | <b>User Name</b>     |                      |
| <b>Acq Method</b>             | ACN_H2O_40_60_esi_positive_bintu3min.m | <b>Acquired Time</b> | 10/1/2019 1:05:51 PM |
| <b>IRM Calibration Status</b> | Success                                | <b>DA Method</b>     | PROCESSNEW.m         |
| <b>Comment</b>                |                                        |                      |                      |

|                     |      |                               |                                                        |
|---------------------|------|-------------------------------|--------------------------------------------------------|
| <b>Sample Group</b> |      | <b>Info.</b>                  |                                                        |
| <b>Stream Name</b>  | LC 1 | <b>Acquisition SW Version</b> | 6200 series TOF/6500 series Q-TOF B.06.01 (B61.72 SP1) |

## Compound Table

| Compound Label        | RT    | Mass     | Abund | Formula        | Tgt Mass | Diff (ppm) |
|-----------------------|-------|----------|-------|----------------|----------|------------|
| Cpd 1: 0.175 397.1380 | 0.175 | 396.1309 | 50166 | C23 H25 O2 P S | 396.1313 | -1.07      |

| Compound Label        | m/z      | RT    | Algorithm       | Mass     |
|-----------------------|----------|-------|-----------------|----------|
| Cpd 1: 0.175 397.1380 | 419.1199 | 0.175 | Find By Formula | 396.1309 |

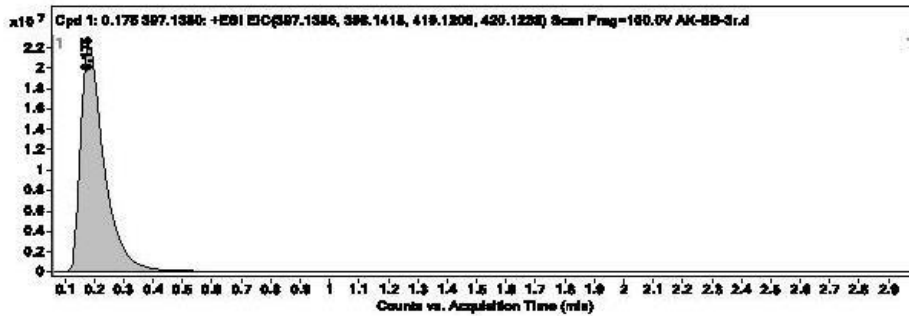

## MS Zoomed Spectrum

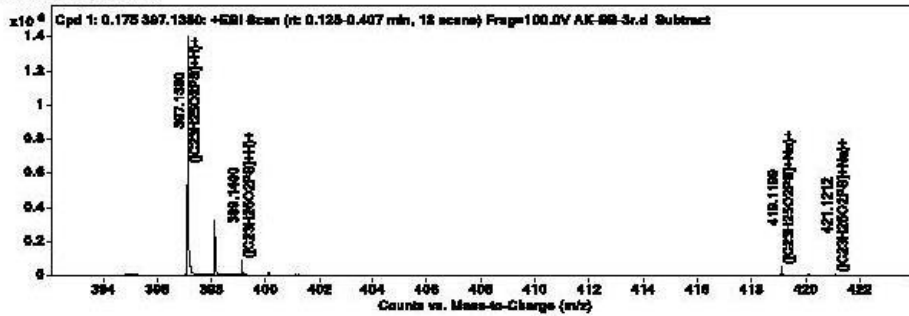

## MS Spectrum Peak List

| m/z      | Calc m/z | Diff(ppm) | z | Abund      | Formula    | Ion     |
|----------|----------|-----------|---|------------|------------|---------|
| 397.138  | 397.1386 | 1.35      | 1 | 1409909.75 | C23H25O2PS | (M+H)+  |
| 398.1416 | 398.1418 | 0.61      | 1 | 340891.69  | C23H25O2PS | (M+H)+  |
| 399.14   | 399.1391 | -2.24     | 1 | 85673.02   | C23H25O2PS | (M+H)+  |
| 419.1199 | 419.1205 | 1.39      | 1 | 50165.6    | C23H25O2PS | (M+Na)+ |
| 420.123  | 420.1238 | 1.97      | 1 | 12085.31   | C23H25O2PS | (M+Na)+ |
| 421.1212 | 421.121  | -0.38     | 1 | 3416.94    | C23H25O2PS | (M+Na)+ |

Instrument Info : Agilent Technologies 6545 Q-TOF LC/MS

# HRMS Spectrum of compound 3t

**Data File** AK-SB-3T.d **Sample Name** AK-SB-3T  
**Sample Type** Sample **Position** P2-D1  
**Instrument Name** Instrument 1 **User Name**  
**Acq Method** ChB60ChD40\_isocratic\_esi\_positive\_3min.m **Acquired Time** 10/3/2019 12:15:22 PM  
**IRM Calibration Status** Success **DA Method** PROCESSNEW.m  
**Comment**

**Sample Group** **Info.**  
**Stream Name** LC 1 **Acquisition SW** 6200 series TOF/6500 series  
**Version** Q-TOF B.06.01 (B6172 SP1)

## Compound Table

| Compound Label        | RT    | Mass     | Abund  | Formula       | Tgt Mass | Diff (ppm) |
|-----------------------|-------|----------|--------|---------------|----------|------------|
| Cpd 1: 0.201 353.1128 | 0.201 | 352.1055 | 174621 | C21 H21 O P S | 352.1051 | 1.32       |

| Compound Label        | m/z      | RT    | Algorithm       | Mass     |
|-----------------------|----------|-------|-----------------|----------|
| Cpd 1: 0.201 353.1128 | 353.1128 | 0.201 | Find By Formula | 352.1055 |

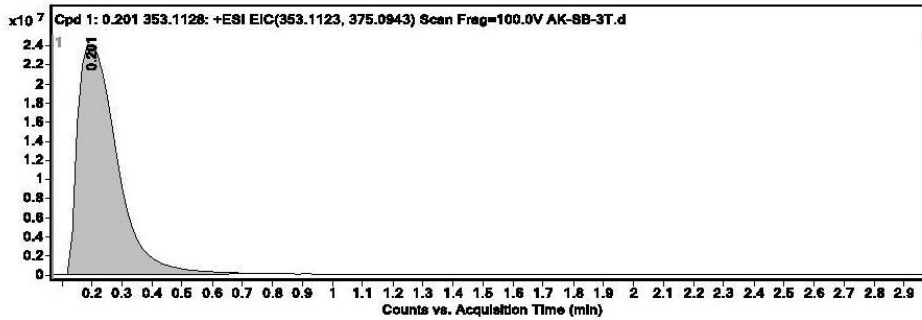

## MS Zoomed Spectrum

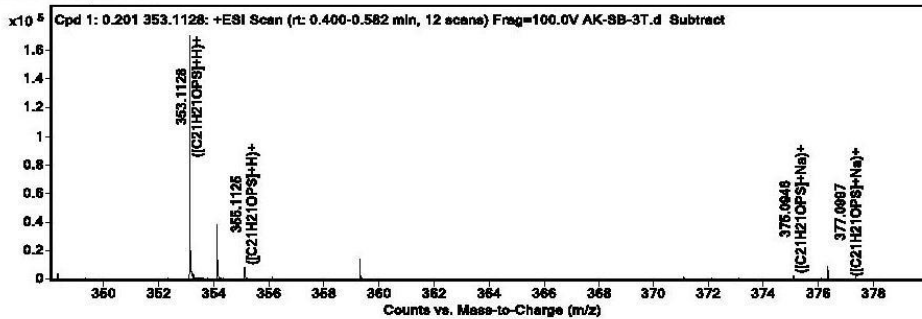

## MS Spectrum Peak List

| m/z      | Calc m/z | Diff(ppm) | z | Abund     | Formula   | Ion                 |
|----------|----------|-----------|---|-----------|-----------|---------------------|
| 353.1128 | 353.1123 | -1.35     | 1 | 174620.74 | C21H21OPS | (M+H) <sup>+</sup>  |
| 354.116  | 354.1156 | -1.25     | 1 | 39249.14  | C21H21OPS | (M+H) <sup>+</sup>  |
| 355.1125 | 355.1123 | -0.41     | 1 | 8483.23   | C21H21OPS | (M+H) <sup>+</sup>  |
| 375.0946 | 375.0943 | -0.86     | 1 | 2487.16   | C21H21OPS | (M+Na) <sup>+</sup> |
| 376.0983 | 376.0975 | -2.12     | 1 | 424.69    | C21H21OPS | (M+Na) <sup>+</sup> |
| 377.0997 | 377.0942 | -14.36    | 1 | 309.7     | C21H21OPS | (M+Na) <sup>+</sup> |

Instrument Info : Agilent Technologies 6545 Q-TOF LC/MS

# HRMS Spectrum of compound 3u

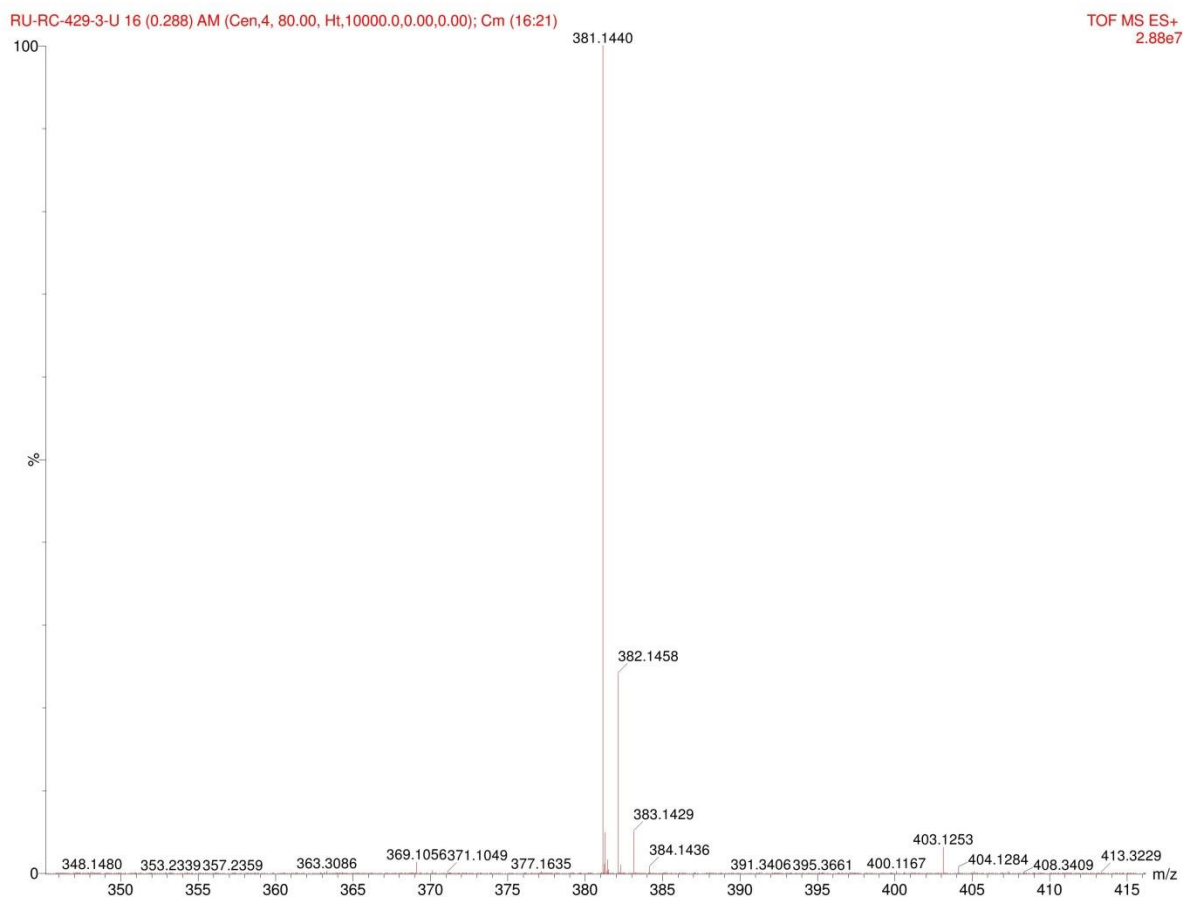

# HRMS Spectrum of compound 3v

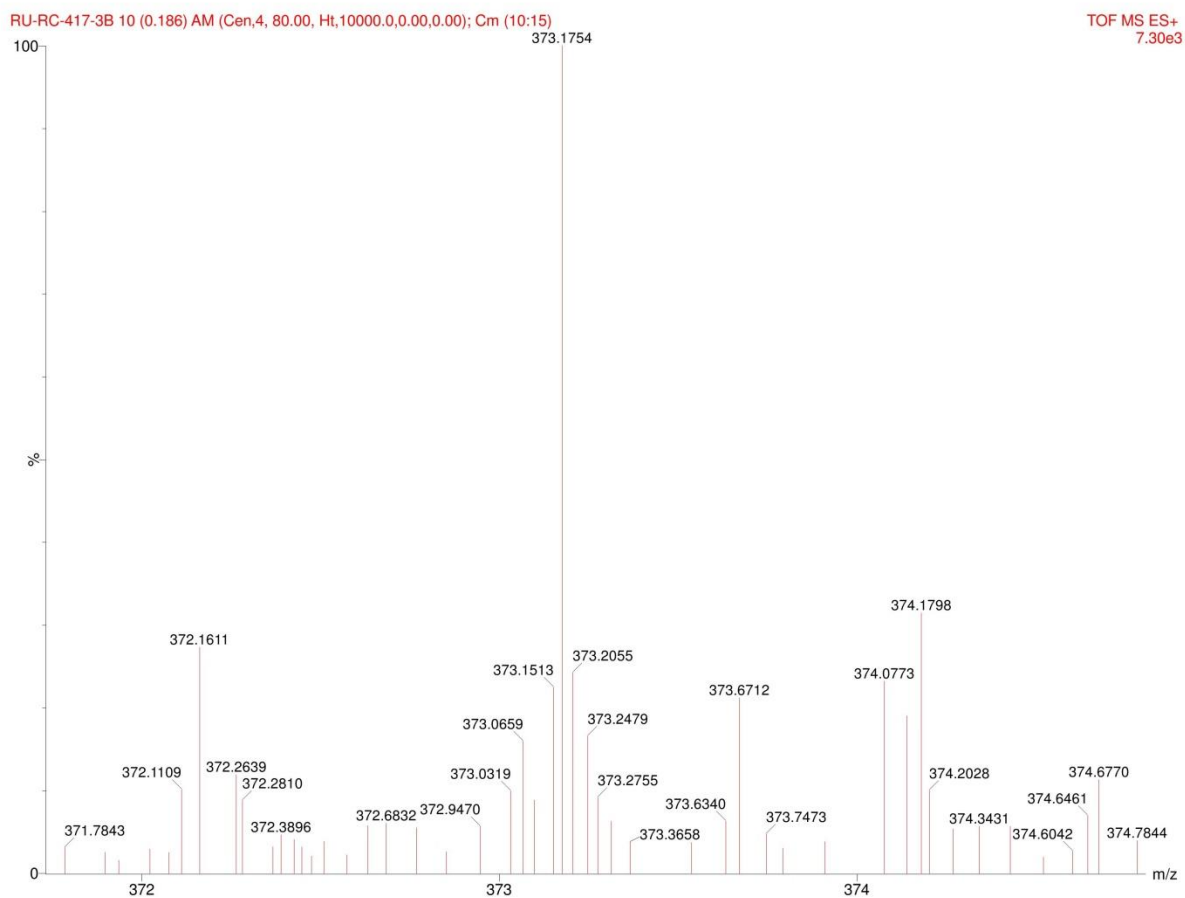

# HRMS Spectrum of compound 5b

**Data File** AK-SB-5B.d **Sample Name** AK-SB-5B  
**Sample Type** Sample **Position** P2-D4  
**Instrument Name** Instrument 1 **User Name**  
**Acq Method** ChB60ChD40\_isocratic\_esi\_positive\_3min.m **Acquired Time** 10/3/2019 12:40:09 PM  
**IRM Calibration Status** Success **DA Method** PROCESSNEW.m  
**Comment**

**Sample Group**  
**Stream Name** LC 1 **Info.**  
**Acquisition SW** 6200 series TOF/6500 series  
**Version** Q-TOF B.06.01 (B6172 SP1)

## Compound Table

| Compound Label        | RT    | Mass     | Abund | Formula         | Tgt Mass | Diff (ppm) |
|-----------------------|-------|----------|-------|-----------------|----------|------------|
| Cpd 1: 0.176 325.0110 | 0.176 | 318.0096 | 8135  | C11 H17 O4 P Se | 318.0089 | 2.09       |

| Compound Label        | m/z      | RT    | Algorithm       | Mass     |
|-----------------------|----------|-------|-----------------|----------|
| Cpd 1: 0.176 325.0110 | 346.9927 | 0.176 | Find By Formula | 318.0096 |

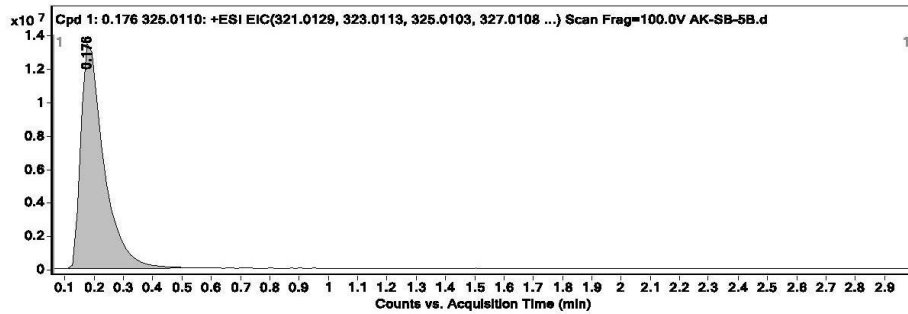

## MS Zoomed Spectrum

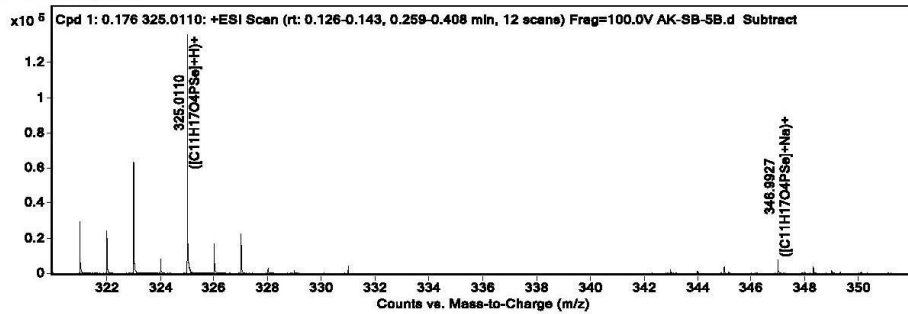

## MS Spectrum Peak List

| m/z      | Calc m/z | Diff(ppm) | z | Abund     | Formula     | Ion     |
|----------|----------|-----------|---|-----------|-------------|---------|
| 325.011  | 325.0103 | -2.12     | 1 | 136999.18 | C11H17O4PSe | (M+H)+  |
| 326.0143 | 326.0137 | -1.85     | 1 | 16884.26  | C11H17O4PSe | (M+H)+  |
| 346.9927 | 346.9922 | -1.29     | 1 | 8135.31   | C11H17O4PSe | (M+Na)+ |
| 347.996  | 347.9956 | -1.12     | 1 | 910.83    | C11H17O4PSe | (M+Na)+ |

Instrument Info : Agilent Technologies 6545 Q-TOF LC/MS

# HRMS Spectrum of compound 5d

|                               |                                          |                      |                       |
|-------------------------------|------------------------------------------|----------------------|-----------------------|
| <b>Data File</b>              | AK-SB-5D.d                               | <b>Sample Name</b>   | AK-SB-5D              |
| <b>Sample Type</b>            | Sample                                   | <b>Position</b>      | P2-D5                 |
| <b>Instrument Name</b>        | Instrument 1                             | <b>User Name</b>     |                       |
| <b>Acq Method</b>             | ChB60ChD40_isocratic_esi_positive_3min.m | <b>Acquired Time</b> | 10/3/2019 12:48:26 PM |
| <b>IRM Calibration Status</b> | Success                                  | <b>DA Method</b>     | PROCESSNEW.m          |
| <b>Comment</b>                |                                          |                      |                       |

|                     |      |                       |                             |
|---------------------|------|-----------------------|-----------------------------|
| <b>Sample Group</b> |      | <b>Info.</b>          |                             |
| <b>Stream Name</b>  | LC 1 | <b>Acquisition SW</b> | 6200 series TOF/6500 series |
|                     |      | <b>Version</b>        | Q-TOF B.06.01 (B6172 SP1)   |

## Compound Table

| Compound Label        | RT    | Mass     | Abund | Formula         | Tgt Mass | Diff (ppm) |
|-----------------------|-------|----------|-------|-----------------|----------|------------|
| Cpd 1: 0.189 309.0137 | 0.189 | 302.0123 | 8666  | C11 H17 O3 P Se | 302.014  | -5.54      |

| Compound Label        | m/z      | RT    | Algorithm       | Mass     |
|-----------------------|----------|-------|-----------------|----------|
| Cpd 1: 0.189 309.0137 | 330.9956 | 0.189 | Find By Formula | 302.0123 |

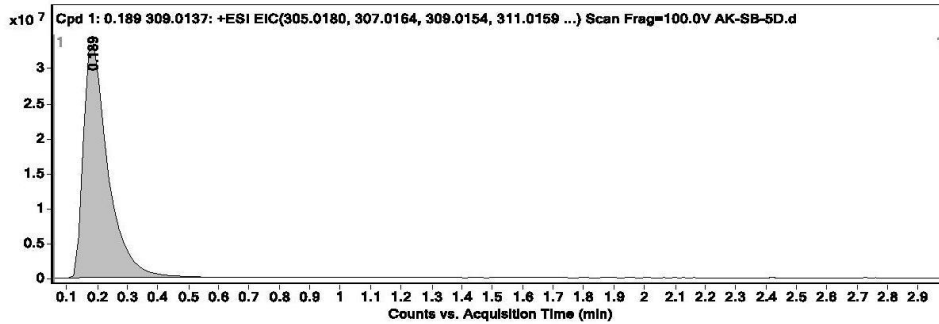

## MS Zoomed Spectrum

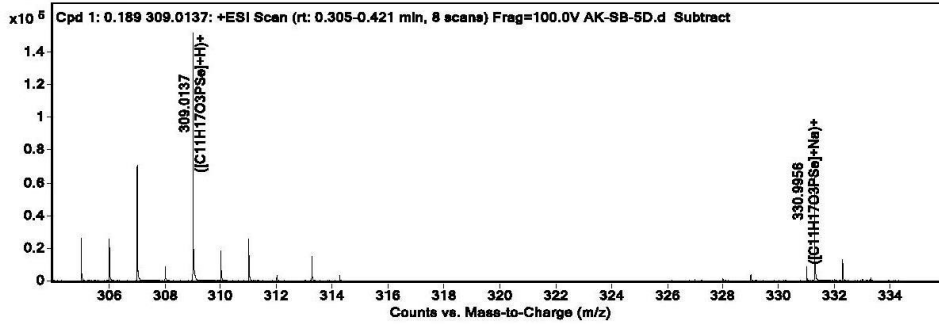

## MS Spectrum Peak List

| m/z      | Calc m/z | Diff(ppm) | z | Abund     | Formula     | Ion     |
|----------|----------|-----------|---|-----------|-------------|---------|
| 309.0137 | 309.0154 | 5.42      | 1 | 152145.06 | C11H17O3PSe | (M+H)+  |
| 310.0171 | 310.0188 | 5.23      | 1 | 18248.33  | C11H17O3PSe | (M+H)+  |
| 330.9956 | 330.9973 | 5.13      | 1 | 8666.43   | C11H17O3PSe | (M+Na)+ |
| 331.9988 | 332.0007 | 5.66      | 1 | 1157      | C11H17O3PSe | (M+Na)+ |

Instrument Info : Agilent Technologies 6545 Q-TOF LC/MS

# HRMS Spectrum of compound 5e

**Data File** AK-SB-5E.d **Sample Name** AK-SB-5E  
**Sample Type** Sample **Position** P2-D6  
**Instrument Name** Instrument 1 **User Name**  
**Acq Method** ChB60ChD40\_isocratic\_esi\_positive\_3min.m **Acquired Time** 10/3/2019 12:56:42 PM  
**IRM Calibration Status** Success **DA Method** PROCESSNEW.m  
**Comment**

**Sample Group**  
**Stream Name** LC 1 **Info.**  
**Acquisition SW** 6200 series TOF/6500 series  
**Version** Q-TOF B.06.01 (B6172 SP1)

## Compound Table

| Compound Label        | RT    | Mass     | Abund | Formula            | Tgt Mass | Diff (ppm) |
|-----------------------|-------|----------|-------|--------------------|----------|------------|
| Cpd 1: 0.192 372.9079 | 0.192 | 365.9068 | 5379  | C10 H14 Br O3 P Se | 365.9089 | -5.59      |

| Compound Label        | m/z      | RT    | Algorithm       | Mass     |
|-----------------------|----------|-------|-----------------|----------|
| Cpd 1: 0.192 372.9079 | 394.8895 | 0.192 | Find By Formula | 365.9068 |

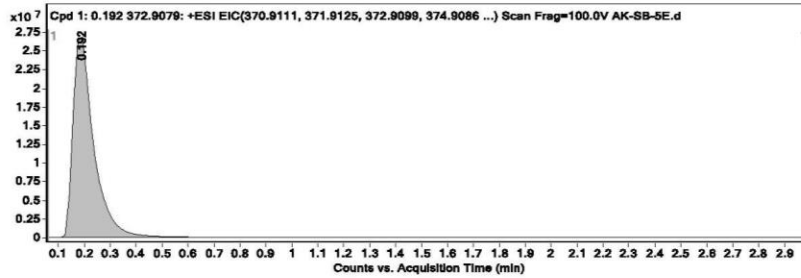

## MS Zoomed Spectrum

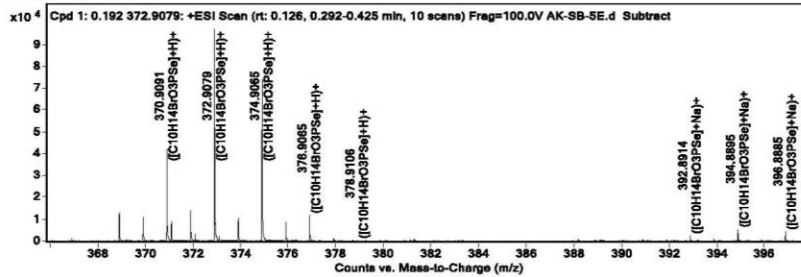

## MS Spectrum Peak List

| m/z      | Calc m/z | Diff (ppm) | z | Abund    | Formula       | Ion     |
|----------|----------|------------|---|----------|---------------|---------|
| 370.9091 | 370.9111 | 5.35       | 1 | 42435.1  | C10H14BrO3PSe | (M+H)+  |
| 371.9105 | 371.9125 | 5.57       | 1 | 13903.93 | C10H14BrO3PSe | (M+H)+  |
| 372.9079 | 372.9099 | 5.33       | 1 | 97119.04 | C10H14BrO3PSe | (M+H)+  |
| 373.9111 | 373.9133 | 5.92       | 1 | 10842.53 | C10H14BrO3PSe | (M+H)+  |
| 374.9065 | 374.9086 | 5.55       | 1 | 75129.39 | C10H14BrO3PSe | (M+H)+  |
| 375.9098 | 375.912  | 5.61       | 1 | 8617.62  | C10H14BrO3PSe | (M+H)+  |
| 376.9065 | 376.9087 | 5.81       | 1 | 11772.72 | C10H14BrO3PSe | (M+H)+  |
| 377.9092 | 377.912  | 7.23       | 1 | 1241.46  | C10H14BrO3PSe | (M+H)+  |
| 378.9106 | 378.9139 | 8.79       | 1 | 247.23   | C10H14BrO3PSe | (M+H)+  |
| 392.8914 | 392.8931 | 4.14       | 1 | 2389.1   | C10H14BrO3PSe | (M+Na)+ |
| 393.8929 | 393.8945 | 3.86       | 1 | 772.18   | C10H14BrO3PSe | (M+Na)+ |
| 394.8895 | 394.8918 | 5.98       | 1 | 5378.82  | C10H14BrO3PSe | (M+Na)+ |
| 395.8932 | 395.8952 | 4.97       | 1 | 515.42   | C10H14BrO3PSe | (M+Na)+ |
| 396.8885 | 396.8905 | 5.07       | 1 | 4225.32  | C10H14BrO3PSe | (M+Na)+ |
| 397.8927 | 397.8939 | 2.99       | 1 | 363.53   | C10H14BrO3PSe | (M+Na)+ |
| 398.8892 | 398.8907 | 3.71       | 1 | 682.65   | C10H14BrO3PSe | (M+Na)+ |
| 399.8823 | 399.8939 | 29.09      | 1 | 54.13    | C10H14BrO3PSe | (M+Na)+ |

Instrument Info : Agilent Technologies 6545 Q-TOF LC/MS



# HRMS Spectrum of compound 5h

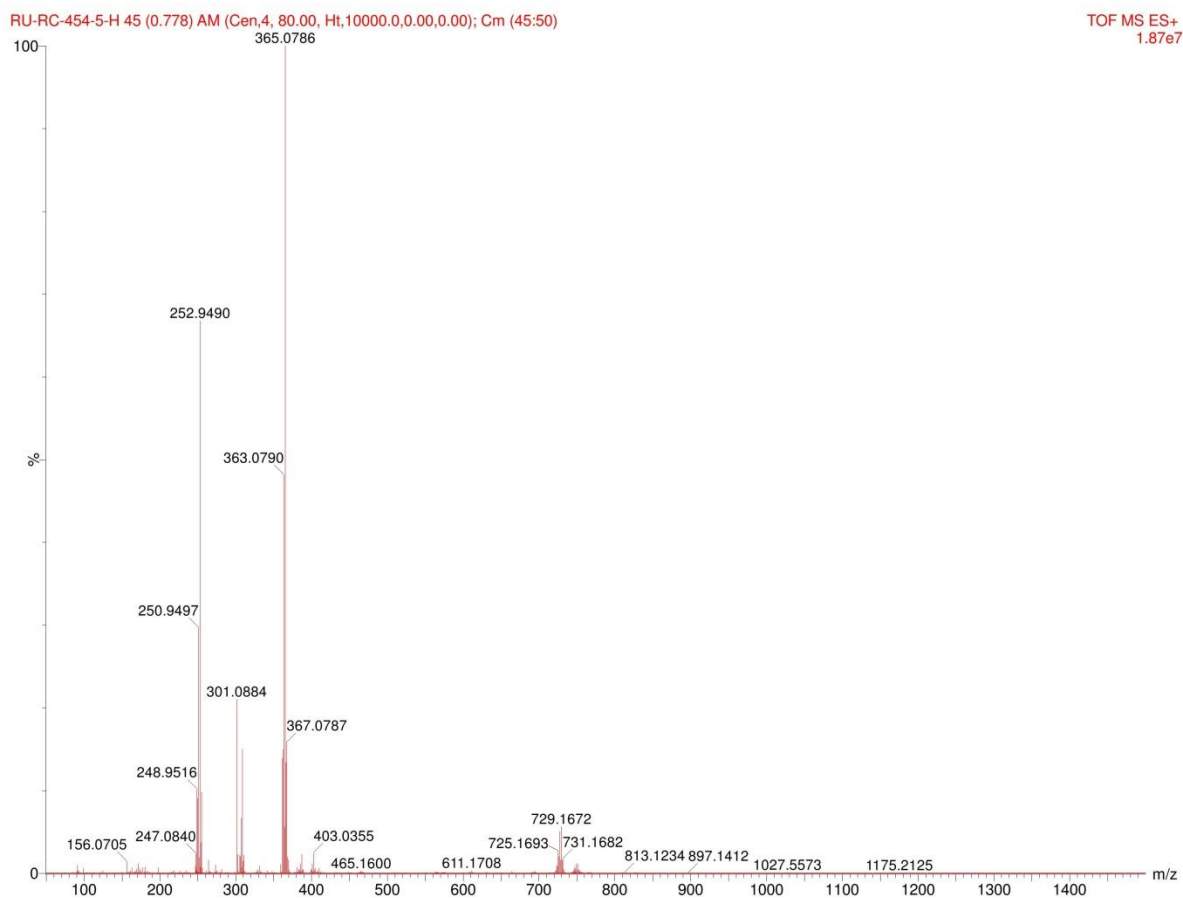

# HRMS Spectrum of compound 5j

|                               |                                          |                      |                      |
|-------------------------------|------------------------------------------|----------------------|----------------------|
| <b>Data File</b>              | AK-SB-5J.d                               | <b>Sample Name</b>   | AK-SB-5J             |
| <b>Sample Type</b>            | Sample                                   | <b>Position</b>      | P2-D7                |
| <b>Instrument Name</b>        | Instrument 1                             | <b>User Name</b>     |                      |
| <b>Acq Method</b>             | ChB60ChD40_isocratic_esi_positive_3min.m | <b>Acquired Time</b> | 10/3/2019 1:04:55 PM |
| <b>IRM Calibration Status</b> | Success                                  | <b>DA Method</b>     | PROCESSNEW.m         |
| <b>Comment</b>                |                                          |                      |                      |

|                     |      |                       |                             |
|---------------------|------|-----------------------|-----------------------------|
| <b>Sample Group</b> |      | <b>Info.</b>          |                             |
| <b>Stream Name</b>  | LC 1 | <b>Acquisition SW</b> | 6200 series TOF/6500 series |
|                     |      | <b>Version</b>        | Q-TOF B.06.01 (B6172 SP1)   |

## Compound Table

| Compound Label        | RT    | Mass     | Abund | Formula         | Tgt Mass | Diff (ppm) |
|-----------------------|-------|----------|-------|-----------------|----------|------------|
| Cpd 1: 0.181 337.0089 | 0.181 | 330.0075 | 66802 | C12 H17 O4 P Se | 330.0089 | -4.32      |

| Compound Label        | m/z      | RT    | Algorithm       | Mass     |
|-----------------------|----------|-------|-----------------|----------|
| Cpd 1: 0.181 337.0089 | 337.0089 | 0.181 | Find By Formula | 330.0075 |

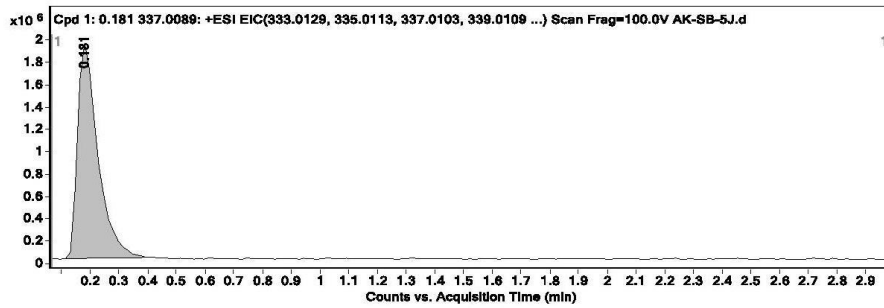

## MS Zoomed Spectrum

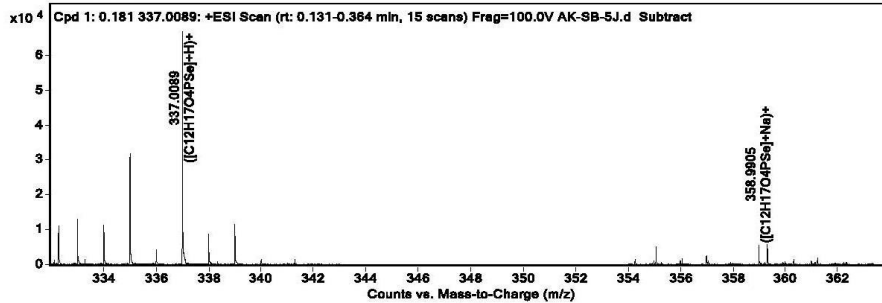

## MS Spectrum Peak List

| m/z      | Calc m/z | Diff(ppm) | z | Abund    | Formula     | Ion     |
|----------|----------|-----------|---|----------|-------------|---------|
| 337.0089 | 337.0103 | 4.2       | 1 | 66801.91 | C12H17O4PSe | (M+H)+  |
| 338.0124 | 338.0137 | 3.79      | 1 | 8742.53  | C12H17O4PSe | (M+H)+  |
| 358.9905 | 358.9922 | 4.71      | 1 | 5565.78  | C12H17O4PSe | (M+Na)+ |
| 359.9936 | 359.9956 | 5.58      | 1 | 799.78   | C12H17O4PSe | (M+Na)+ |

Instrument Info : Agilent Technologies 6545 Q-TOF LC/MS

# HRMS Spectrum of compound 5k

|                               |                                          |                      |                      |
|-------------------------------|------------------------------------------|----------------------|----------------------|
| <b>Data File</b>              | AK-SB-5K.d                               | <b>Sample Name</b>   | AK-SB-5K             |
| <b>Sample Type</b>            | Sample                                   | <b>Position</b>      | P2-D9                |
| <b>Instrument Name</b>        | Instrument 1                             | <b>User Name</b>     |                      |
| <b>Acq Method</b>             | ChB60ChD40_isocratic_esi_positive_3min.m | <b>Acquired Time</b> | 10/3/2019 1:21:18 PM |
| <b>IRM Calibration Status</b> | Success                                  | <b>DA Method</b>     | PROCESSNEW.m         |
| <b>Comment</b>                |                                          |                      |                      |

|                     |      |                       |                             |
|---------------------|------|-----------------------|-----------------------------|
| <b>Sample Group</b> |      | <b>Info.</b>          |                             |
| <b>Stream Name</b>  | LC 1 | <b>Acquisition SW</b> | 6200 series TOF/6500 series |
|                     |      | <b>Version</b>        | Q-TOF B.06.01 (B6172 SP1)   |

## Compound Table

| Compound Label        | RT    | Mass     | Abund  | Formula         | Tgt Mass | Diff (ppm) |
|-----------------------|-------|----------|--------|-----------------|----------|------------|
| Cpd 1: 0.184 321.0135 | 0.184 | 314.0121 | 116716 | C12 H17 O3 P Se | 314.014  | -6.14      |

| Compound Label        | m/z      | RT    | Algorithm       | Mass     |
|-----------------------|----------|-------|-----------------|----------|
| Cpd 1: 0.184 321.0135 | 321.0135 | 0.184 | Find By Formula | 314.0121 |

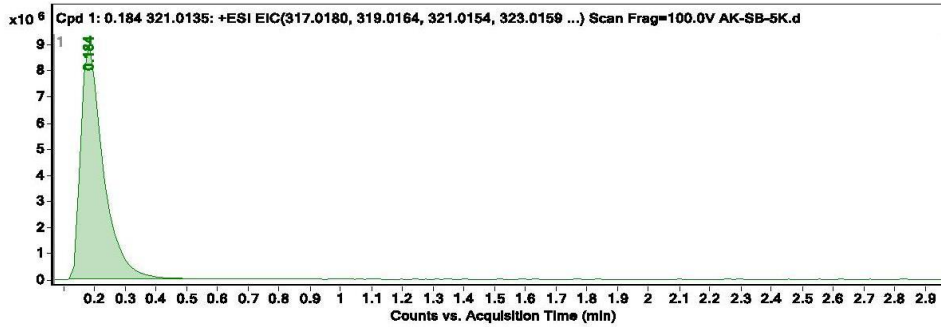

## MS Zoomed Spectrum

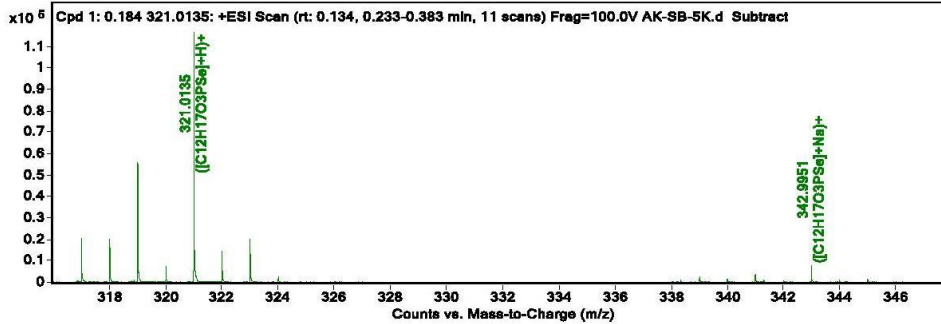

## MS Spectrum Peak List

| m/z      | Calc m/z | Diff(ppm) | z | Abund    | Formula     | Ion     |
|----------|----------|-----------|---|----------|-------------|---------|
| 321.0135 | 321.0154 | 5.88      | 1 | 116716.3 | C12H17O3PSe | (M+H)+  |
| 322.0168 | 322.0188 | 6.23      | 1 | 14837.48 | C12H17O3PSe | (M+H)+  |
| 342.9951 | 342.9973 | 6.58      | 1 | 7932.92  | C12H17O3PSe | (M+Na)+ |
| 343.9976 | 344.0007 | 8.89      | 1 | 963.54   | C12H17O3PSe | (M+Na)+ |

Instrument Info : Agilent Technologies 6545 Q-TOF LC/MS

# HRMS Spectrum of compound 8

|                               |                                          |                      |                      |
|-------------------------------|------------------------------------------|----------------------|----------------------|
| <b>Data File</b>              | AK-SB-8.d                                | <b>Sample Name</b>   | AK-SB-8              |
| <b>Sample Type</b>            | Sample                                   | <b>Position</b>      | P2-D8                |
| <b>Instrument Name</b>        | Instrument 1                             | <b>User Name</b>     |                      |
| <b>Acq Method</b>             | ChB60ChD40_isocratic_esi_positive_3min.m | <b>Acquired Time</b> | 10/3/2019 1:13:06 PM |
| <b>IRM Calibration Status</b> | Success                                  | <b>DA Method</b>     | PROCESSNEW.m         |
| <b>Comment</b>                |                                          |                      |                      |

|                     |      |                               |                                                       |
|---------------------|------|-------------------------------|-------------------------------------------------------|
| <b>Sample Group</b> |      | <b>Info.</b>                  |                                                       |
| <b>Stream Name</b>  | LC 1 | <b>Acquisition SW Version</b> | 6200 series TOF/6500 series Q-TOF B.06.01 (B6172 SP1) |

### Compound Table

| Compound Label        | RT    | Mass     | Abund  | Formula       | Tgt Mass | Diff (ppm) |
|-----------------------|-------|----------|--------|---------------|----------|------------|
| Cpd 1: 0.185 142.1583 | 0.185 | 265.1488 | 106439 | C15 H23 N O S | 265.15   | -4.81      |

| Compound Label        | m/z      | RT    | Algorithm       | Mass     |
|-----------------------|----------|-------|-----------------|----------|
| Cpd 1: 0.185 142.1583 | 266.1561 | 0.185 | Find By Formula | 265.1488 |

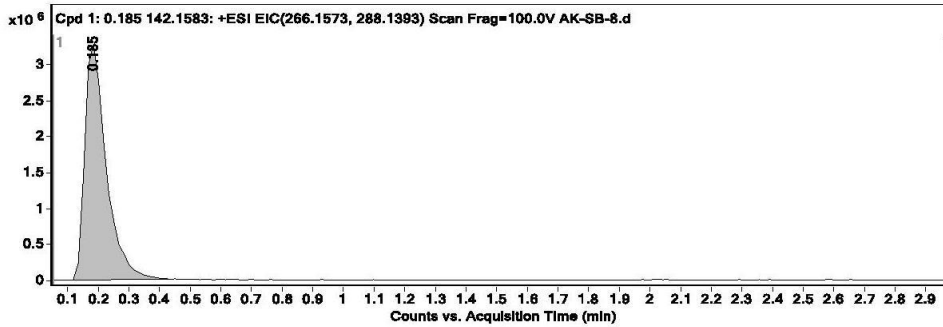

### MS Zoomed Spectrum

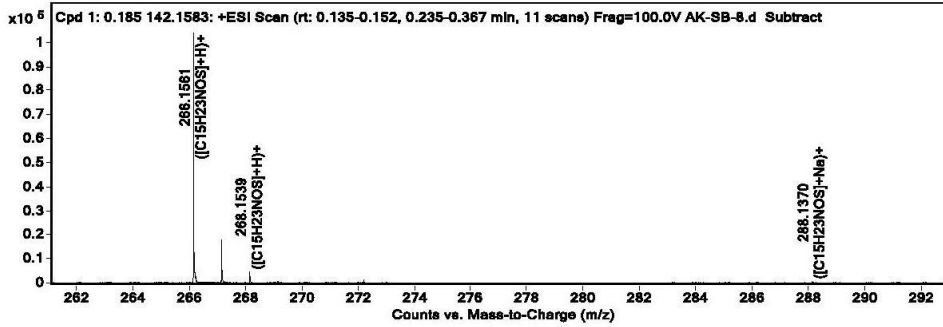

### MS Spectrum Peak List

| m/z      | Calc m/z | Diff(ppm) | z | Abund     | Formula   | Ion     |
|----------|----------|-----------|---|-----------|-----------|---------|
| 266.1561 | 266.1573 | 4.67      | 1 | 106438.68 | C15H23NOS | (M+H)+  |
| 267.1593 | 267.1604 | 4.25      | 1 | 17821.39  | C15H23NOS | (M+H)+  |
| 268.1539 | 268.1559 | 7.29      | 1 | 4639.62   | C15H23NOS | (M+H)+  |
| 288.137  | 288.1393 | 7.67      | 1 | 713.26    | C15H23NOS | (M+Na)+ |
| 289.1316 | 289.1423 | 37.01     | 1 | 220.37    | C15H23NOS | (M+Na)+ |

Instrument Info : Agilent Technologies 6545 Q-TOF LC/MS
